# Supplementary material for: Solvent-Induced Transient Self-Assembly of Peptide Gels: Gelator–Solvent Reactions and Material Properties Correlation
Source: PubMed Central journal article supplement (PMC10782441; doi:10.1021/acs.chemmater.3c02327), 2023-12-15
Supplement: cm3c02327_si_001.pdf [file cm3c02327_si_001.pdf]

## Supporting Information

### **Solvent-Induced Transient Self-Assembly of Peptide Gels: Gelator-Solvent Reactions and Material Properties Correlation**

*Romain Chevigny,<sup>†</sup> Henna Rahkola,<sup>†</sup> Efstratios D. Sitsanidis,<sup>†</sup> Elsa  
Korhonen,<sup>†</sup> Jennifer R. Hiscock,<sup>‡</sup> Mika Pettersson,<sup>†</sup> and Maija  
Nissinen<sup>\*†</sup>*

<sup>†</sup> Department of Chemistry, Nanoscience Center, University of Jyväskylä, P.O.  
Box 35, FI-40014 JYU Finland

<sup>‡</sup> School of Physical Sciences, University of Kent, Canterbury, Kent, CT2 7NH,  
UK

## Table of Contents

|        |                                                         |    |
|--------|---------------------------------------------------------|----|
| 1.     | Synthesis and characterization .....                    | 3  |
| 1.1.   | Synthesis of diprotected precursors <b>1-8</b> .....    | 3  |
| 1.1.1. | Boc-Phe-Phe-O <i>t</i> Bu <b>1</b> .....                | 3  |
| 1.1.2. | Boc-Phe-Phe-Phe-O <i>t</i> Bu <b>2</b> .....            | 5  |
| 1.1.3. | Boc-Leu-Phe-O <i>t</i> Bu <b>3</b> .....                | 9  |
| 1.1.4. | Boc-Ile-Phe-O <i>t</i> Bu <b>4</b> .....                | 10 |
| 1.1.5. | Boc-Val-Phe-O <i>t</i> Bu <b>5</b> .....                | 12 |
| 1.1.6. | Boc-Ala-Phe-O <i>t</i> Bu <b>6</b> .....                | 13 |
| 1.1.7. | Boc-Gly-Phe-O <i>t</i> Bu <b>7</b> .....                | 15 |
| 1.1.8. | Boc-Tyr-Phe-O <i>t</i> Bu <b>8</b> .....                | 16 |
| 1.2.   | Synthesis of monoprotected compounds <b>1a-3a</b> ..... | 18 |
| 1.2.1. | Phe-Phe-O <i>t</i> Bu <b>1a</b> .....                   | 18 |
| 1.2.2. | Phe-Phe-Phe-O <i>t</i> Bu <b>2a</b> .....               | 20 |
| 1.2.3. | Leu-Phe-O <i>t</i> Bu <b>3a</b> .....                   | 21 |
| 2.     | Gelation and gel characterization .....                 | 23 |
| 2.1.   | Gelation protocol .....                                 | 23 |

|        |                                                                                                                           |    |
|--------|---------------------------------------------------------------------------------------------------------------------------|----|
| 2.2    | Gel characterization by NMR .....                                                                                         | 24 |
| 2.2.1  | Gel system <b>I</b> : Precursor Boc-Phe-Phe-O <i>t</i> Bu <b>1</b> .....                                                  | 25 |
| 2.2.2  | Gel system <b>II</b> : Precursor Boc-Phe-Phe-Phe-O <i>t</i> Bu <b>2</b> .....                                             | 28 |
| 2.2.3. | Gel system <b>III</b> : Precursor Boc-Leu-Phe-O <i>t</i> Bu <b>3</b> .....                                                | 32 |
| 2.2.4. | Gel system <b>IV</b> : Precursor Boc-Phe-Phe-O <i>t</i> Bu <b>1</b> + Boc-Leu-Phe-O <i>t</i> Bu <b>3</b> , 1:1 ratio..... | 37 |
| 2.2.5. | Gelation attempt in DCM.....                                                                                              | 43 |
| 2.3.   | Solvatochromism and concentration study by UV-vis.....                                                                    | 44 |
| 2.4.   | Phase-transition temperature .....                                                                                        | 45 |
| 2.5.   | Gelation concentration screening .....                                                                                    | 46 |
| 3.     | FTIR spectra of compounds <b>1-8</b> , <b>1a-3a</b> and xerogels <b>I-IV</b> .....                                        | 48 |
| 4.     | UV-vis spectra of compounds <b>1-1a</b> , <b>2-2a</b> and <b>3-3a</b> .....                                               | 58 |
| 5.     | Rheology measurement plots of gel systems <b>I</b> , <b>II</b> , <b>III</b> and <b>IV</b> .....                           | 60 |

## 1. Synthesis and characterization

### 1.1. Synthesis of diprotected precursors 1-8

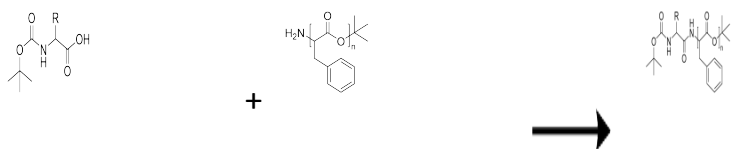

General protocol: Boc-protected amino acid (1.0 equivalent), TBTU (1.0 equivalent) and NaHCO<sub>3</sub> (1.0 equivalent) were suspended in anhydrous DMF (10 mL) under N<sub>2</sub> atmosphere. The solution

was left to stir at R.T. for 1 hour. *tert*-butyl protected amino acid (1.1 equivalent) and NaHCO<sub>3</sub> (1.1 equivalent) were suspended in anhydrous DMF (10 mL). The two solutions were mixed and allowed to stir under N<sub>2</sub> atmosphere at R.T. overnight. The solvent was then evaporated under vacuum (co-evaporation with toluene x3), and the residue was dissolved in DCM. The organic phase was extracted with water (x2), subsequently with an aqueous HCl solution (0.1 M), water (x2) and a saturated aqueous solution of NaHCO<sub>3</sub>. The organic phase was then dried with MgSO<sub>4</sub> and evaporated under vacuum, yielding the desired compounds.

### 1.1.1. Boc-Phe-Phe-O~~t~~Bu 1

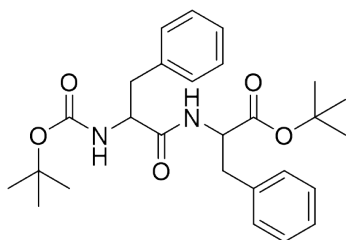

Yellow powder (70 % yield). **Melting point:** 129-133 °C.

**<sup>1</sup>H NMR** (500 MHz, *d*<sub>6</sub>-DMSO) δ 8.21 (d, *J* = 7.5 Hz, 1H), 7.33 – 7.16 (m, 10H), 6.84 (d, *J* = 8.8 Hz, 1H), 4.38 (q, *J* = 7.3 Hz, 1H), 4.19 (td, *J* = 9.8, 3.9 Hz, 1H), 2.96 (ddt, *J* = 31.5, 13.8, 5.7 Hz, 4H), 2.73 – 2.66 (m, 1H), 1.32 (s, 9H), 1.28 (s, 9H).

**<sup>13</sup>C NMR** (126 MHz, *d*<sub>6</sub>-DMSO) δ 171.8, 170.4, 155.2, 138.2, 137.1, 129.3, 129.2, 128.2, 128.0, 126.5, 126.2, 80.7, 78.0, 55.5, 54.1, 37.4, 36.9, 28.1, 27.5.

**HR-MS:** *m/z* for C<sub>27</sub>H<sub>36</sub>N<sub>2</sub>O<sub>5</sub> [M + H]<sup>+</sup> calculated 469.2700, found 469.2675.

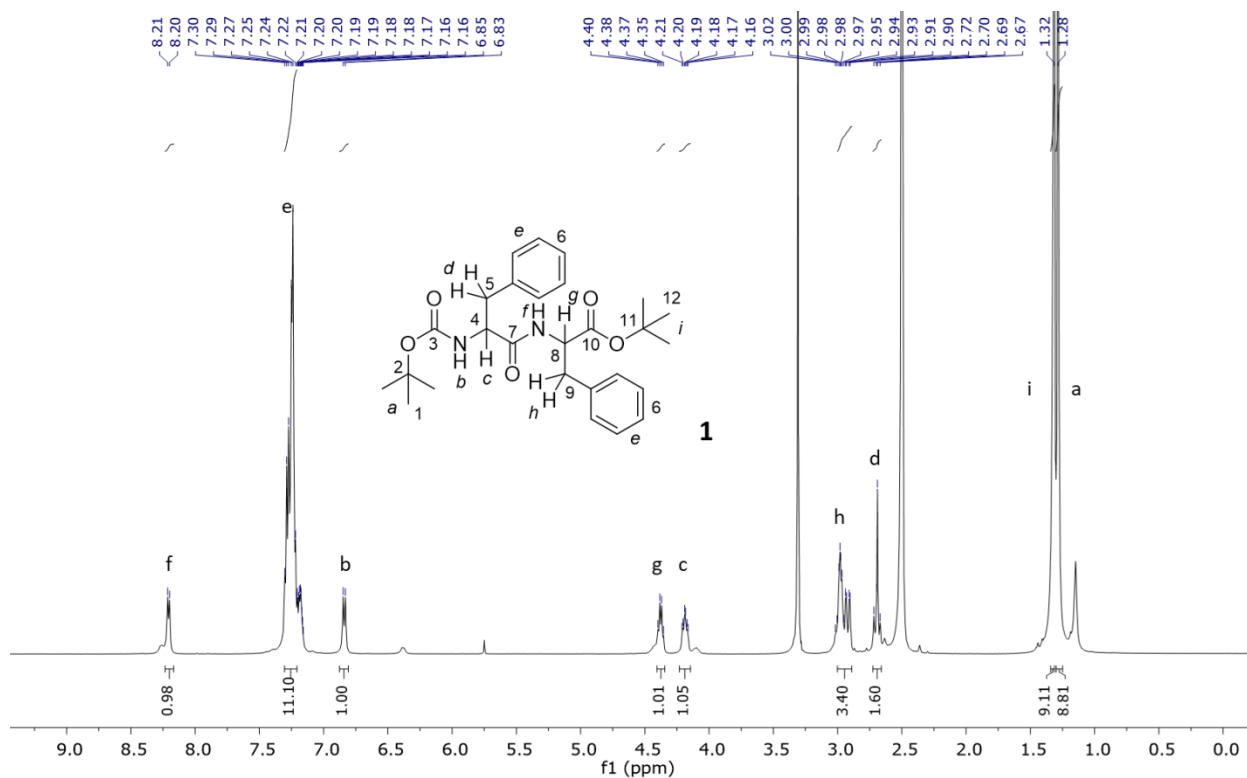

**Figure S1.**  $^1\text{H}$  NMR (500 MHz,  $d_6$ -DMSO) spectrum of Boc-Phe-Phe-OtBu **1**.

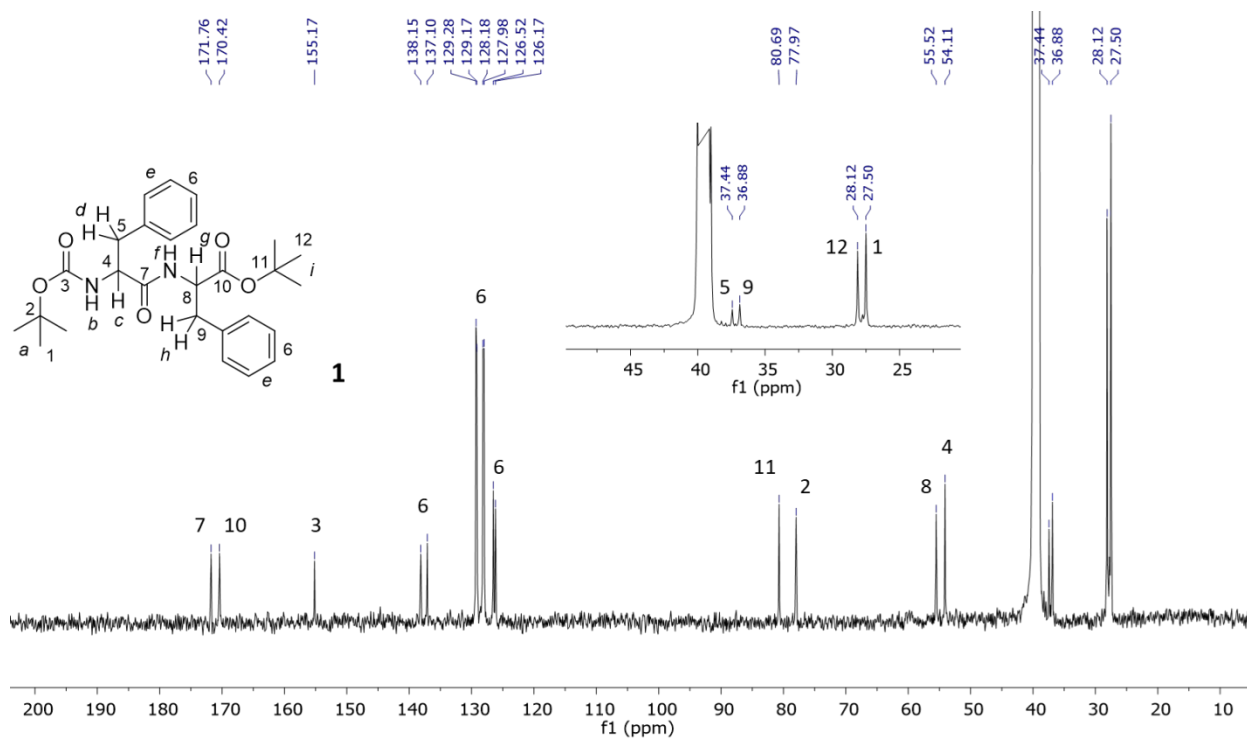

**Figure S2.**  $^{13}\text{C}$  NMR (126 MHz,  $d_6$ -DMSO) spectrum of Boc-Phe-Phe-O $t$ Bu 1.

### 1.1.2. Boc-Phe-Phe-Phe-O $t$ Bu 2

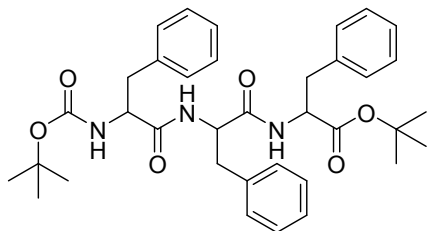

Yellow powder (74 % yield). **Melting point:** 78-83 °C.

$^1\text{H}$  NMR (500 MHz,  $\text{CDCl}_3$ )  $\delta$  7.31 – 6.96 (m, 15H), 6.44 (d,  $J$  = 7.2 Hz, 1H), 6.27 – 6.16 (m, 1H), 4.85 (s, 1H), 4.56 (dq,  $J$  = 14.9, 7.4, 6.8 Hz, 2H), 4.35 – 4.25 (m, 1H), 3.06 – 2.89 (m, 6H), 1.36 (s, 9H), 1.34 (s, 9H).

$^{13}\text{C}$  NMR (126 MHz,  $\text{CDCl}_3$ )  $\delta$  171.0, 169.8, 169.7, 155.3, 136.5, 136.2, 136.0, 129.5, 129.3, 128.7, 128.6, 128.4, 127.0, 127.0, 82.3, 80.3, 55.7, 54.4, 53.9, 38.1, 28.2, 27.9.

$^1\text{H}$  NMR (500 MHz,  $d_6$ -DMSO)  $\delta$  8.46 (d,  $J$  = 7.5 Hz, 0.7H), 8.33 (d,  $J$  = 7.5 Hz, 0.3H), 8.03 (d,  $J$  = 8.6 Hz, 0.3H), 7.90 (d,  $J$  = 8.4 Hz, 0.7H), 7.34 – 7.12 (m, 15H), 6.84 (d,  $J$  = 8.9 Hz, 0.7H), 4.62 (td,  $J$  = 8.8, 4.4 Hz, 0.7H), 4.58 – 4.52 (m, 0.3H), 4.38 (q,  $J$  = 7.5 Hz, 1H), 4.10 (td,  $J$  = 9.7, 3.9 Hz, 0.7H), 4.02 (s, 0.3H), 3.07 – 2.94 (m, 3H), 2.85 – 2.76 (m, 2H), 2.65 – 2.57 (m, 1H), 1.31 (s, 9H), 1.27 (s, 9H). Note: presence of a rotamer (N-H peaks at 8.33 ppm and 8.03 ppm and C-H peak at 4.58 – 4.52 ppm). Peaks corresponding to the rotamer in DMSO vanishes in  $\text{CDCl}_3$  (Figure S3) and higher temperature measurements (Figure S6).

$^{13}\text{C}$  NMR (126 MHz,  $d_6$ -DMSO)  $\delta$  171.7, 171.4, 170.8, 155.5, 138.6, 137.9, 137.5, 129.8, 129.6, 128.7, 128.4, 127.0, 126.7, 126.6, 81.2, 78.6, 56.3, 54.7, 53.7, 38.4, 38.1, 37.4, 28.6, 28.0.

**HR-MS:**  $m/z$  for  $\text{C}_{36}\text{H}_{45}\text{N}_3\text{O}_6$   $[\text{M} + \text{Na}]^+$  calculated 638.3100, found 638.3192.

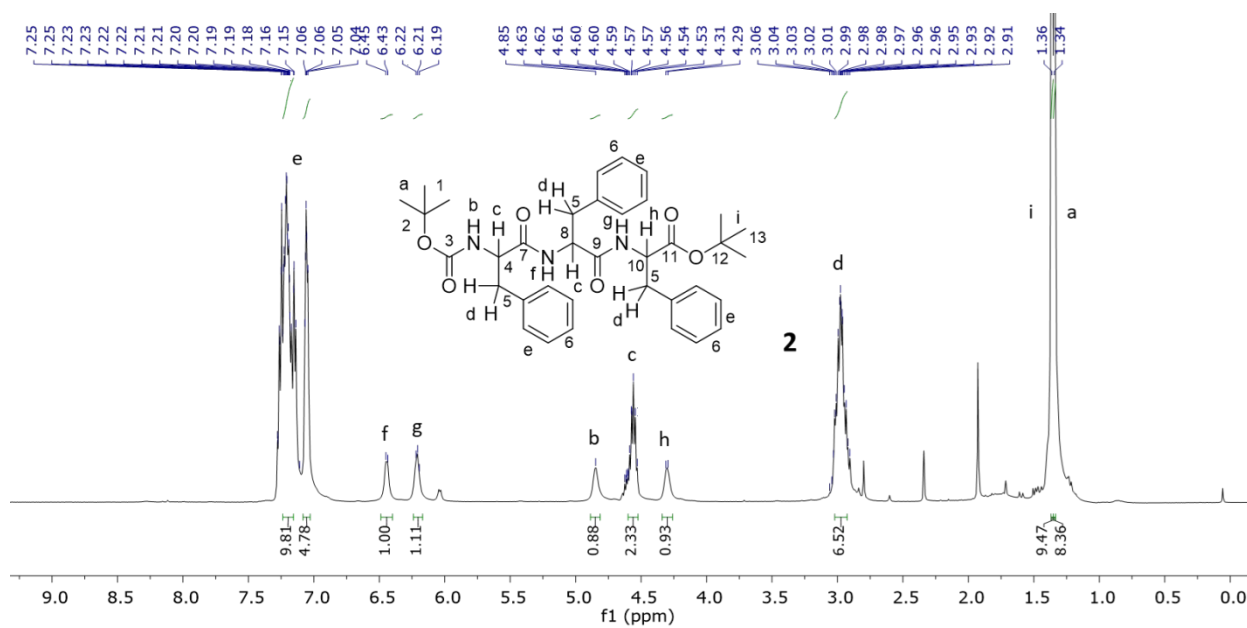

**Figure S3.**  $^1\text{H}$  NMR (500 MHz,  $\text{CDCl}_3$ ) spectrum of Boc-Phe-Phe-Phe-OtBu **2**.

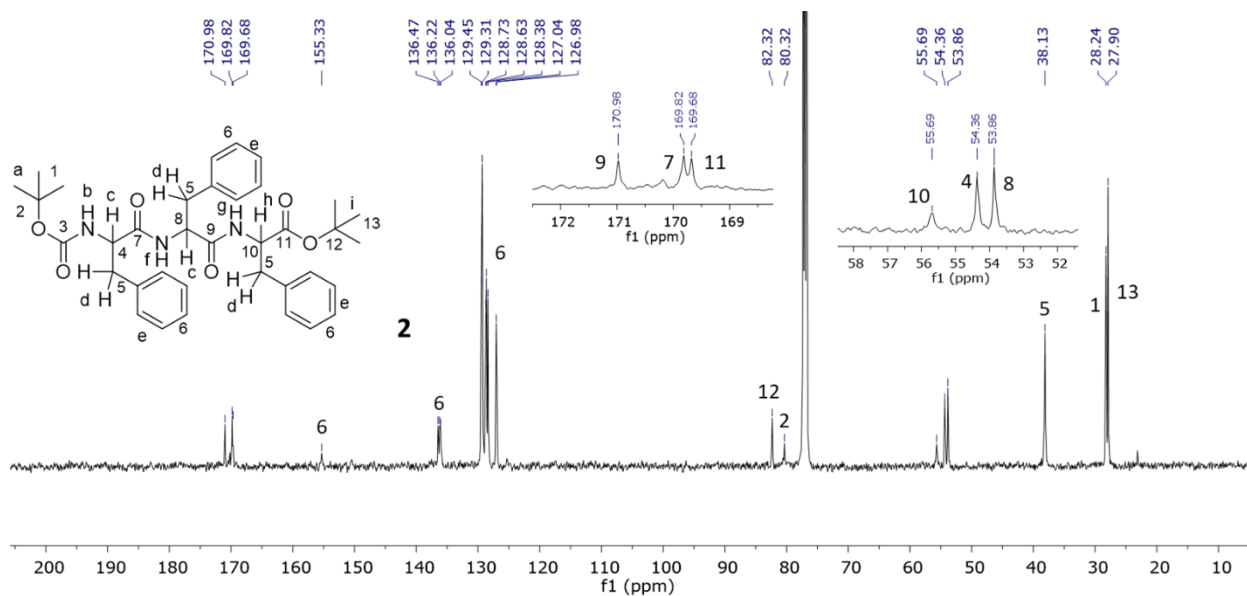

**Figure S4.**  $^{13}\text{C}$  NMR (126 MHz,  $\text{CDCl}_3$ ) spectrum of Boc-Phe-Phe-Phe-OtBu **2**.

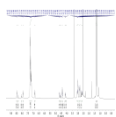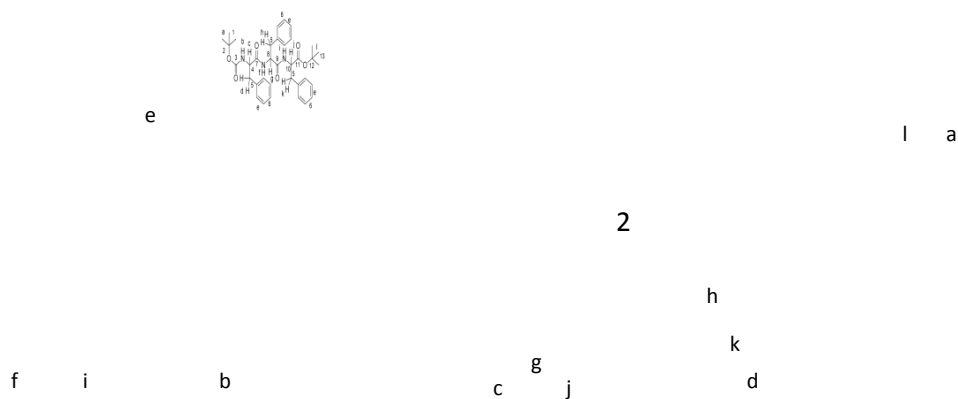

**Figure S5.**  $^1\text{H}$  NMR (500 MHz,  $d_6$ -DMSO) spectrum of Boc-Phe-Phe-Phe-OtBu **2**. Presence of a rotamer.

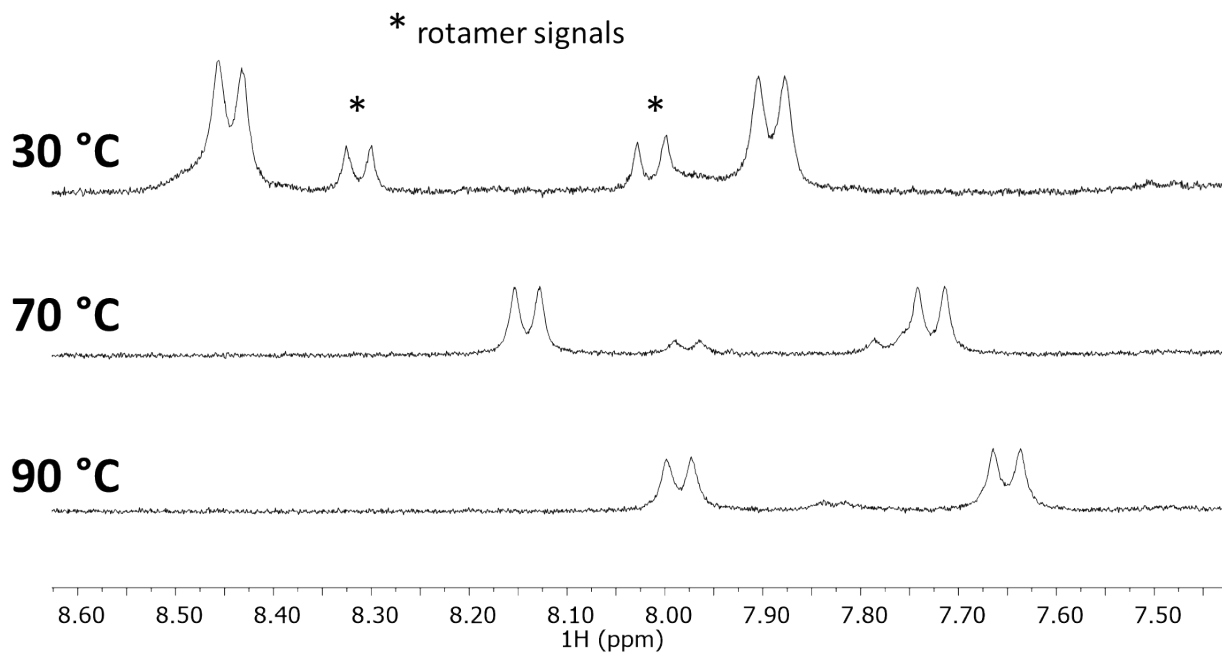



**Figure S6.**  $^1\text{H}$  NMR (500 MHz,  $d_6$ -DMSO) spectrum of Boc-Phe-Phe-Phe-O*t*Bu **2** magnified in the NH amide region showing the rotamer signal at R.T. (30 °C, top row). Temperature increase to 70 °C (middle row) and 90 °C (bottom row) showing the disappearance of the rotamer signals.

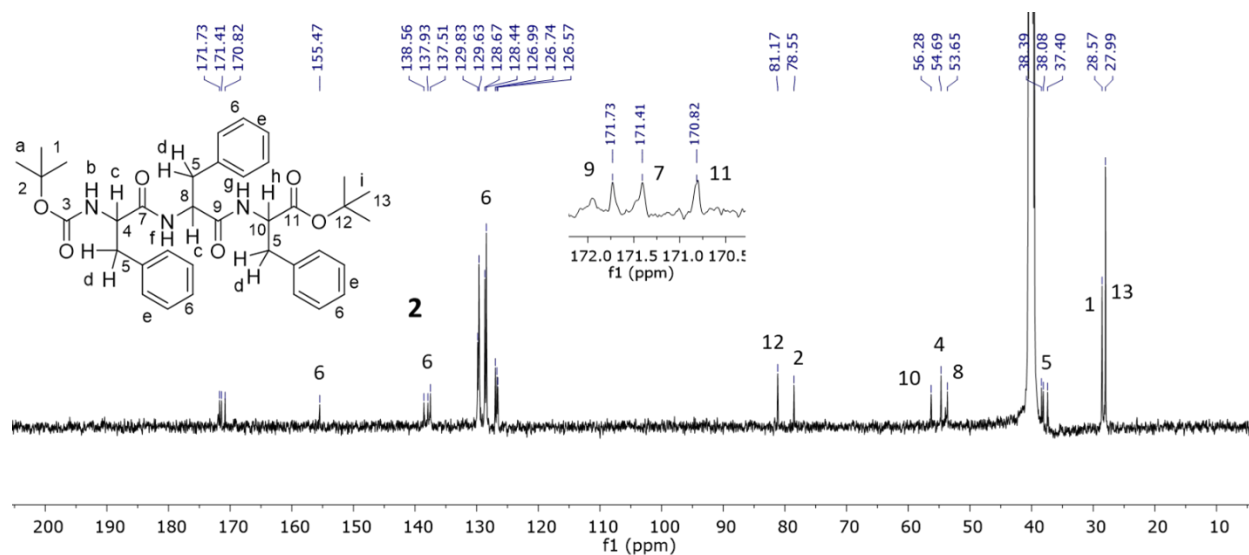

**Figure S7.**  $^{13}\text{C}$  NMR (126 MHz,  $d_6$ -DMSO) spectrum of Boc-Phe-Phe-Phe-O*t*Bu **2**.

### 1.1.3. Boc-Leu-Phe-OBu 3

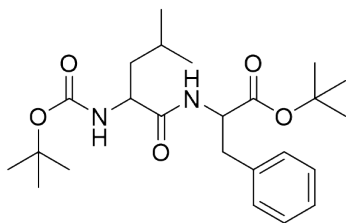

Yellow powder (63 % yield). **Melting point:** 123-126 °C.

**<sup>1</sup>H NMR** (500 MHz, *d*<sub>6</sub>-DMSO) δ 7.99 (d, *J* = 7.6 Hz, 1H), 7.23 (dd, *J* = 22.5, 7.1 Hz, 5H), 6.80 (d, *J* = 8.7 Hz, 1H), 4.35 (q, *J* = 7.5 Hz, 1H), 3.97 (dt, *J* = 14.8, 7.0 Hz, 1H), 2.94 (qd, *J* = 13.6, 6.9 Hz, 2H), 1.59 – 1.51 (m, 1H), 1.37 (s, 9H), 1.34 (m, 2H), 1.31 (s, 9H), 0.84 (dd, *J* = 14.2, 6.6 Hz, 6H). Note: 1.34 ppm peak is hidden within 1.37 ppm and 1.31 ppm peaks.

**<sup>13</sup>C NMR** (126 MHz, *d*<sub>6</sub>-DMSO) δ 172.4, 170.3, 155.1, 137.1, 129.2, 128.1, 126.4, 80.6, 77.9, 53.8, 52.6, 40.8, 36.8, 28.1, 27.5, 24.1, 22.9, 21.5.

**HR-MS:** *m/z* for C<sub>24</sub>H<sub>38</sub>N<sub>2</sub>O<sub>5</sub> [M + Na]<sup>+</sup> calculated 457.2600, found 457.2650.

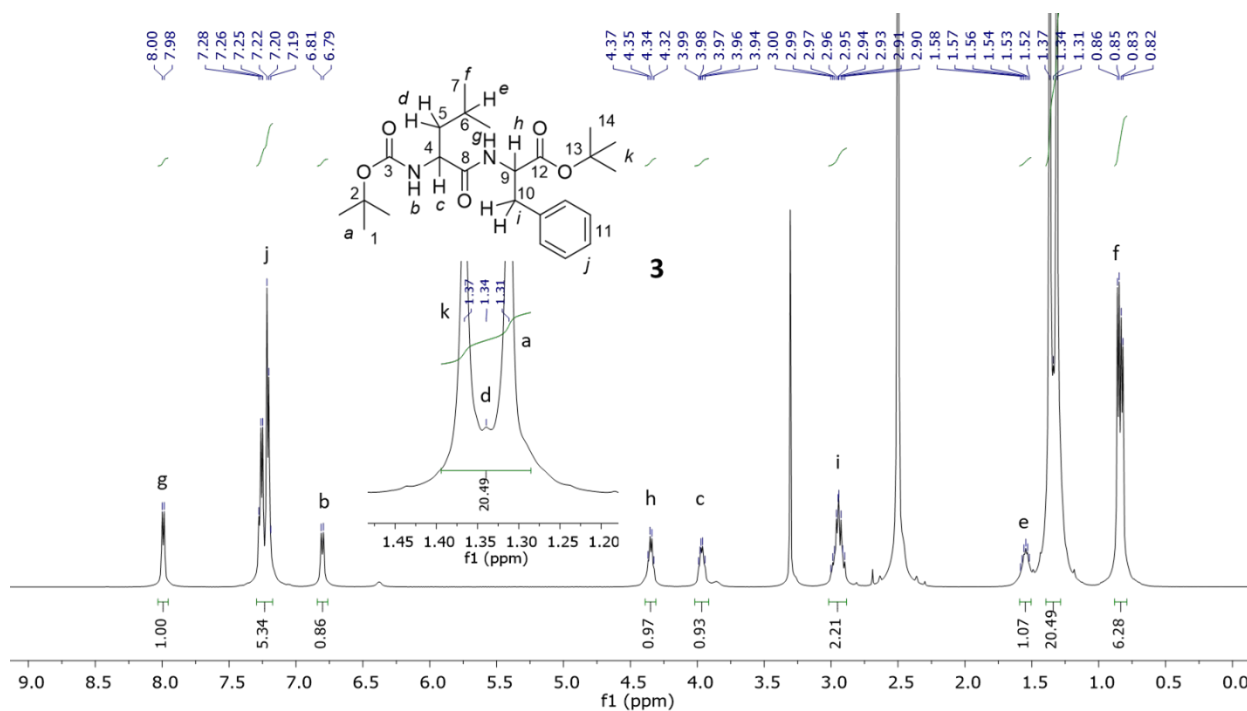

Figure S8. <sup>1</sup>H NMR (500 MHz, *d*<sub>6</sub>-DMSO) spectrum of Boc-Leu-Phe-OBu 3.

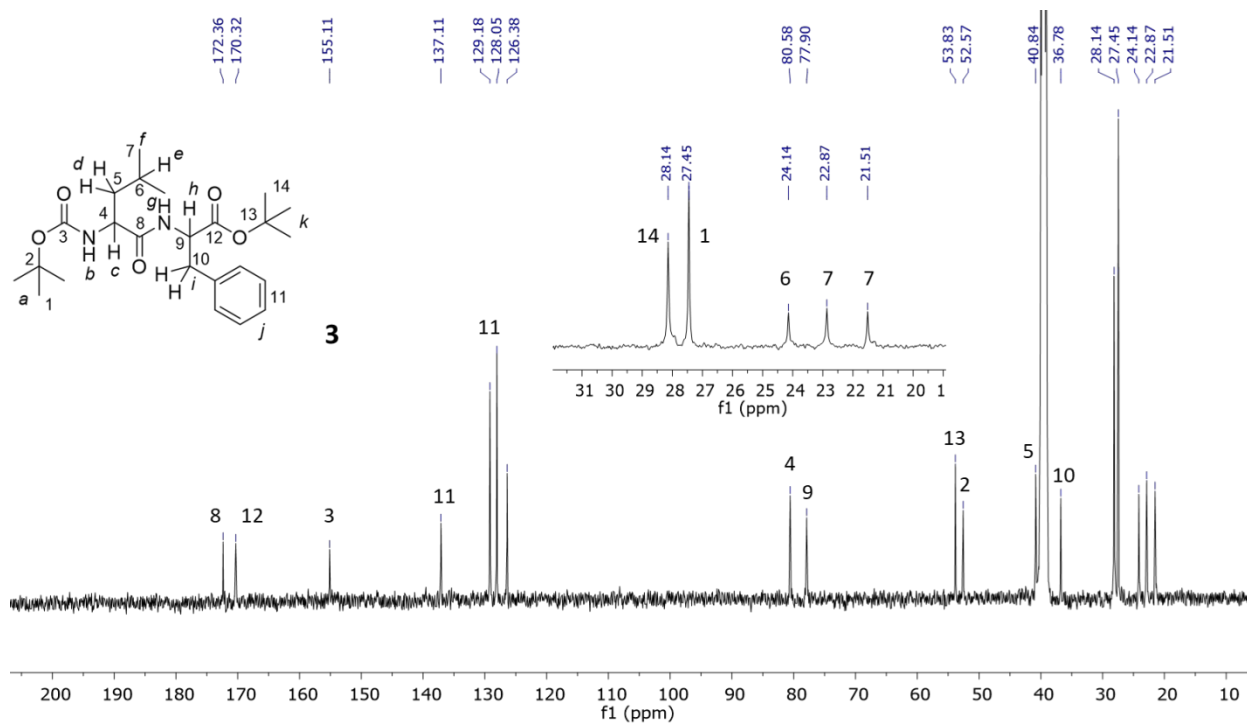

Figure S9. <sup>13</sup>C NMR (126 MHz, *d*<sub>6</sub>-DMSO) spectrum of Boc-Leu-Phe-OBu 3.

#### 1.1.4. Boc-Ile-Phe-O<sup>t</sup>Bu 4

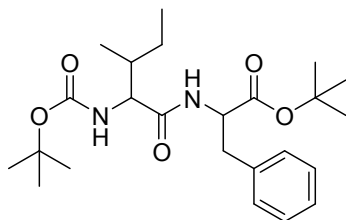

Yellow powder (54 % yield). **Melting point:** 106-110 °C.

**<sup>1</sup>H NMR** (500 MHz, *d*<sub>6</sub>-DMSO) δ 8.11 (d, *J* = 7.7 Hz, 1H), 7.22 (dq, *J* = 14.9, 7.6 Hz, 5H), 6.56 (d, *J* = 9.3 Hz, 1H), 4.37 (d, *J* = 7.4 Hz, 1H), 3.82 (t, *J* = 8.4 Hz, 1H), 2.91 (qd, *J* = 13.8, 7.4 Hz, 2H), 1.64 – 1.56 (m, 1H), 1.36 (s, 9H), 1.32 (m, 1H), 1.29 (s, 9H), 1.02 (dt, *J* = 14.6, 7.7 Hz, 1H), 0.80 – 0.69 (m, 6H). Note: 1.32 ppm peak is hidden within 1.36 ppm and 1.29 ppm peaks.

**<sup>13</sup>C NMR** (126 MHz, *d*<sub>6</sub>-DMSO) δ 171.2, 170.4, 155.1, 137.1, 129.1, 128.1, 126.4, 80.5, 77.9, 58.5, 53.9, 36.9, 36.7, 28.1, 27.5, 24.2, 15.2, 10.9.

**HR-MS:** *m/z* for C<sub>24</sub>H<sub>38</sub>N<sub>2</sub>O<sub>5</sub> [M + Na]<sup>+</sup> calculated 457.2600, found 457.2682.

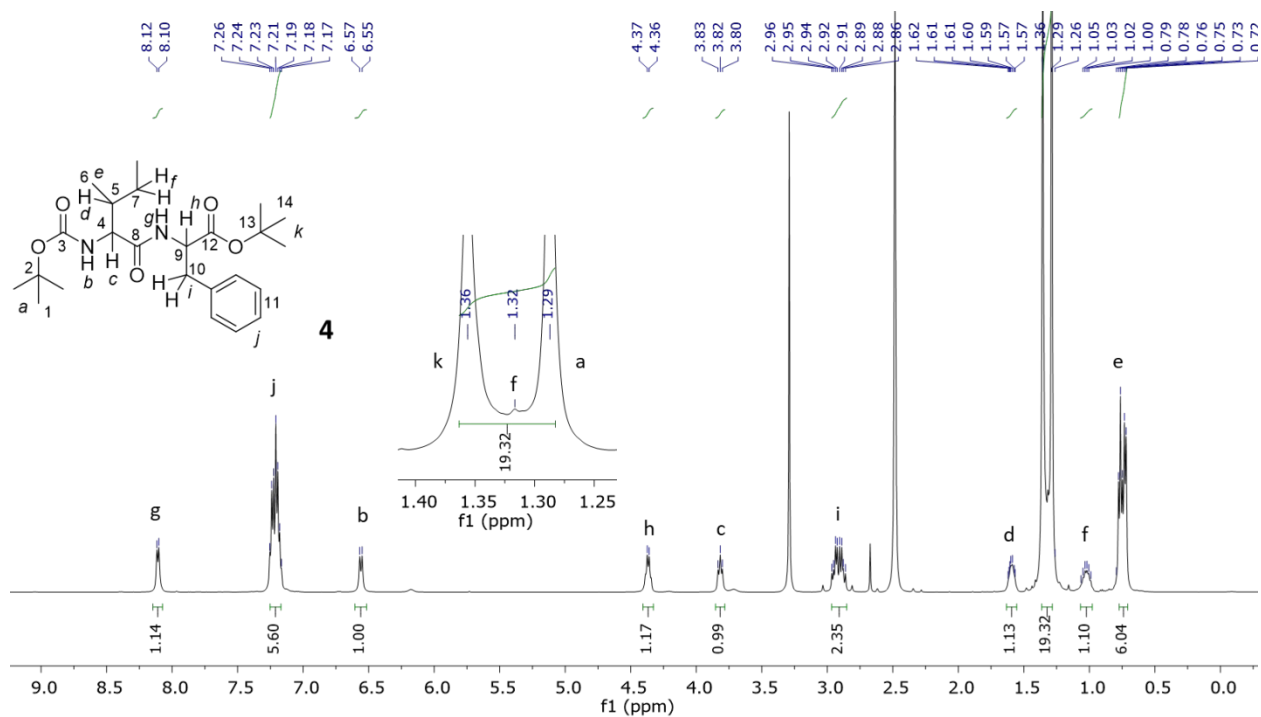

**Figure S10.**  $^1\text{H}$  NMR (500 MHz,  $d_6$ -DMSO) spectrum of Boc-Ile-Phe-OtBu **4**.

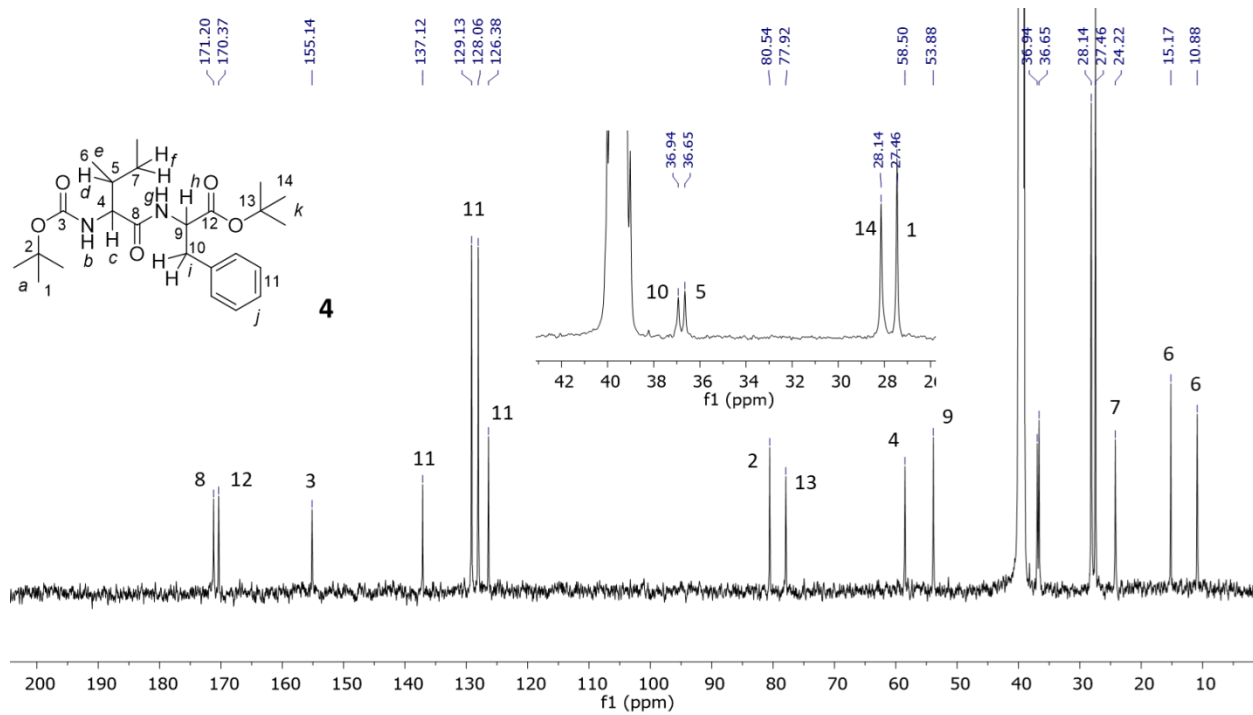

**Figure S11.**  $^{13}\text{C}$  NMR (126 MHz,  $d_6$ -DMSO) spectrum of Boc-Ile-Phe-OtBu **4**.

### 1.1.5. Boc-Val-Phe-O<sup>t</sup>Bu 5

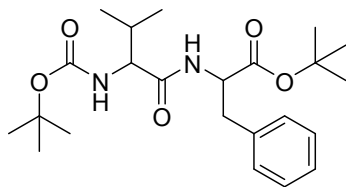

Yellow powder (60 % yield). **Melting point:** 110-113 °C.

**<sup>1</sup>H NMR** (500 MHz, *d*<sub>6</sub>-DMSO) δ 8.13 (d, *J* = 7.7 Hz, 1H), 7.23 (dp, *J* = 21.7, 7.4 Hz, 5H), 6.54 (d, *J* = 9.2 Hz, 1H), 4.38 (q, *J* = 7.5 Hz, 1H), 3.84 – 3.78 (m, 1H), 2.93 (qd, *J* = 13.8, 7.4 Hz, 2H), 1.87 (h, *J* = 6.9 Hz, 1H), 1.30 (s, 9H), 1.37 (s, 9H), 0.78 (dd, *J* = 6.8, 3.2 Hz, 6H).

**<sup>13</sup>C NMR** (126 MHz, *d*<sub>6</sub>-DMSO) δ 171.2, 170.4, 155.3, 137.1, 129.1, 128.1, 126.4, 80.6, 77.9, 59.4, 53.9, 36.9, 30.5, 28.1, 27.4, 19.1, 18.0.

**HR-MS:** *m/z* for C<sub>23</sub>H<sub>36</sub>N<sub>2</sub>O<sub>5</sub> [M + Na]<sup>+</sup> calculated 443.2400, found 443.2528.

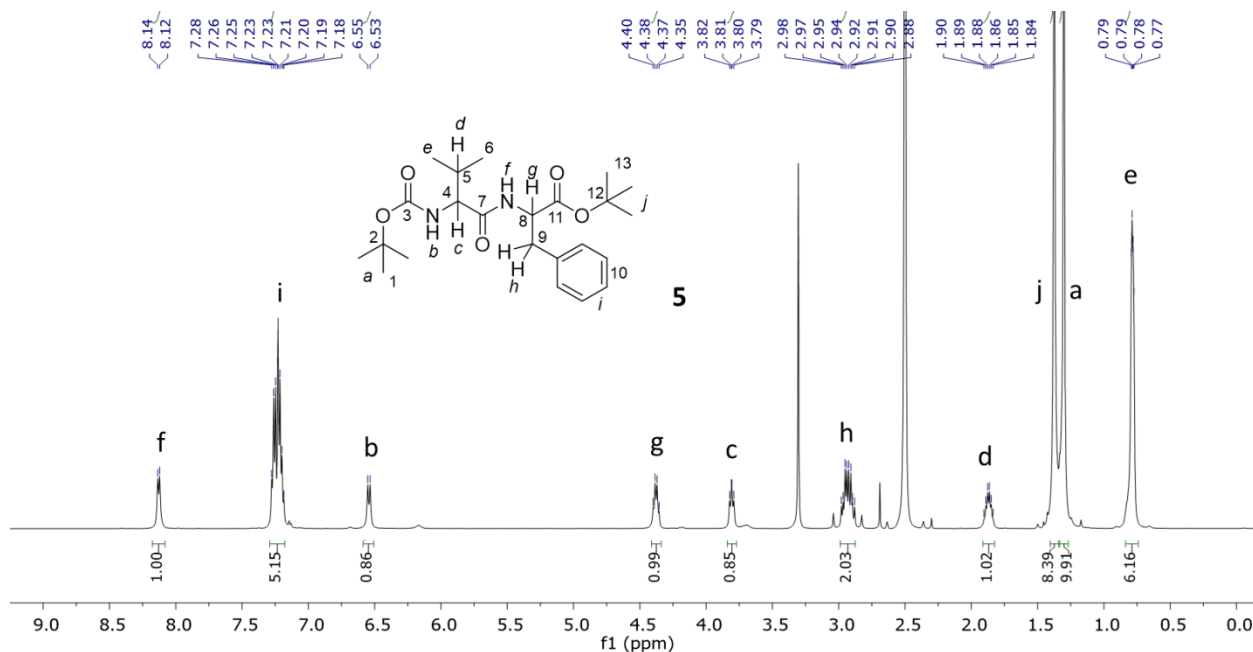

**Figure S12.**  $^1\text{H}$  NMR (500 MHz,  $d_6$ -DMSO) spectrum of Boc-Val-Phe-O*t*Bu **5**.

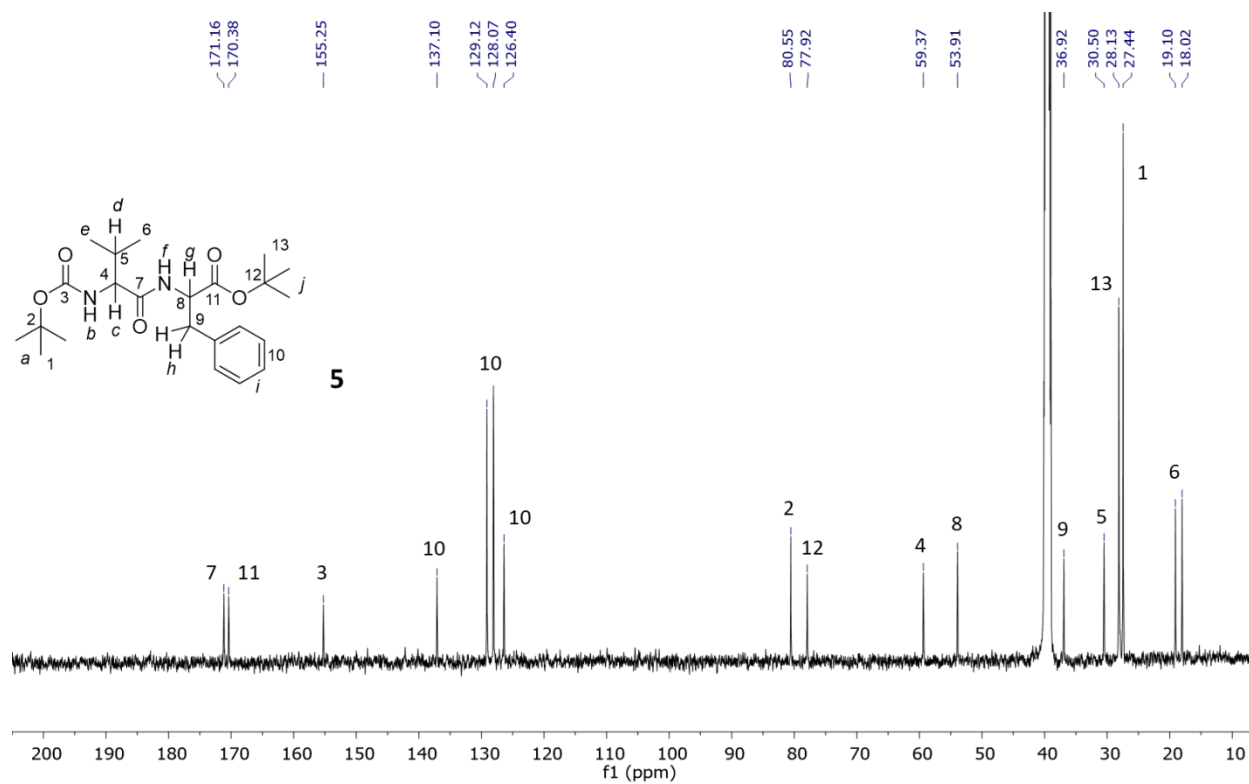

**Figure S13.**  $^{13}\text{C}$  NMR (126 MHz,  $d_6$ -DMSO) spectrum of Boc-Val-Phe-O*t*Bu **5**.

### 1.1.6. Boc-Ala-Phe-O*t*Bu **6**

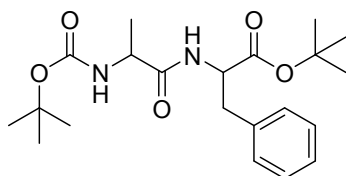

Yellow powder (54 % yield). **Melting point:** 44-47 °C.

$^1\text{H NMR}$  (500 MHz,  $d_6$ -DMSO)  $\delta$  7.96 (d,  $J = 7.6$  Hz, 1H), 7.22 (dd,  $J = 24.0, 7.3$  Hz, 5H), 6.83 (d,  $J = 7.9$  Hz, 1H), 4.31 (q,  $J = 7.3$  Hz, 1H), 3.96 (p,  $J = 7.3$  Hz, 1H), 2.92 (h,  $J = 7.6$  Hz, 2H), 1.35 (s, 9H), 1.29 (s, 9H), 1.12 (d,  $J = 7.2$  Hz, 3H).

$^{13}\text{C NMR}$  (126 MHz,  $d_6$ -DMSO)  $\delta$  172.6, 170.3, 154.9, 137.1, 129.2, 128.1, 126.4, 80.6, 78.0, 53.9, 49.4, 36.8, 28.2, 27.5, 18.2.

**HR-MS:**  $m/z$  for  $\text{C}_{21}\text{H}_{32}\text{N}_2\text{O}_5$   $[\text{M} + \text{Na}]^+$  calculated 415.2100, found 415.2215.

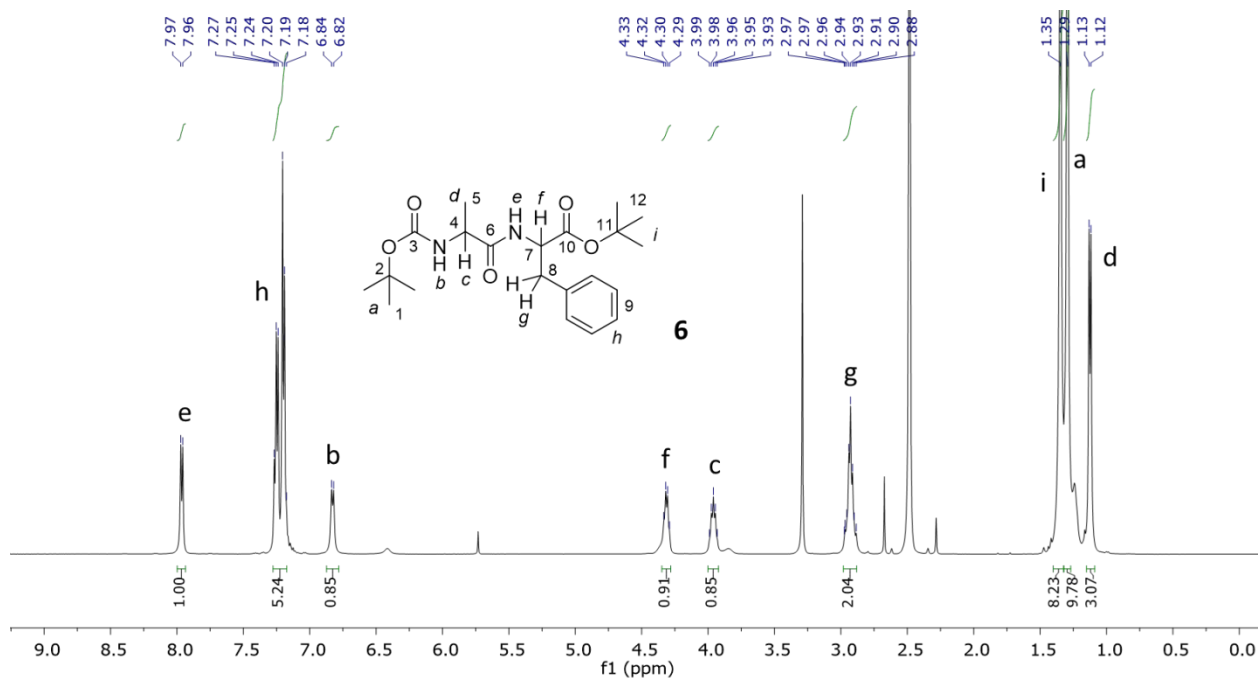

**Figure S14.**  $^1\text{H NMR}$  (500 MHz,  $d_6$ -DMSO) spectrum of Boc-Ala-Phe-OtBu 6.



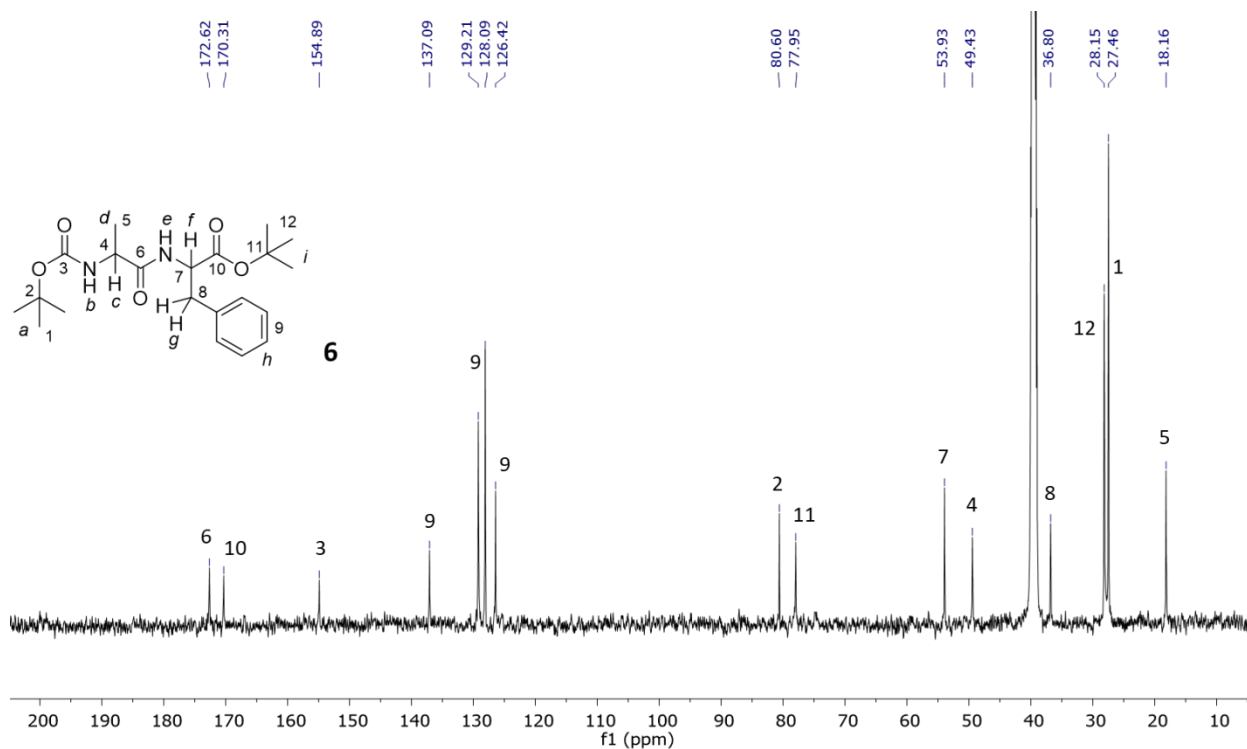

**Figure S15.**  $^{13}\text{C}$  NMR (126 MHz,  $d_6$ -DMSO) spectrum of Boc-Ala-Phe-O $t$ Bu **6**.

### 1.1.7. Boc-Gly-Phe-O $t$ Bu **7**

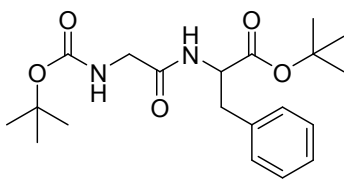

Yellow oil (66 % yield).

$^1\text{H}$  NMR (500 MHz,  $d_6$ -DMSO)  $\delta$  8.03 (d,  $J$ = 7.8 Hz, 1H), 7.24 (dt,  $J$ = 31.3, 7.4 Hz, 5H), 6.91 (t,  $J$ = 6.2 Hz, 1H), 4.37 (q,  $J$ = 7.4 Hz, 1H), 3.57 – 3.51 (m, 1H), 2.98 – 2.88 (m, 2H), 1.37 (s, 9H), 1.31 (s, 9H).

$^{13}\text{C}$  NMR (126 MHz,  $d_6$ -DMSO)  $\delta$  170.4, 169.3, 155.7, 137.0, 129.2, 128.1, 126.5, 80.7, 78.0, 53.9, 42.9, 37.0, 28.1, 27.5.

HR-MS:  $m/z$  for  $C_{20}H_{30}N_2O_5$   $[M + Na]^+$  calculated 401.2000, found 401.2068.

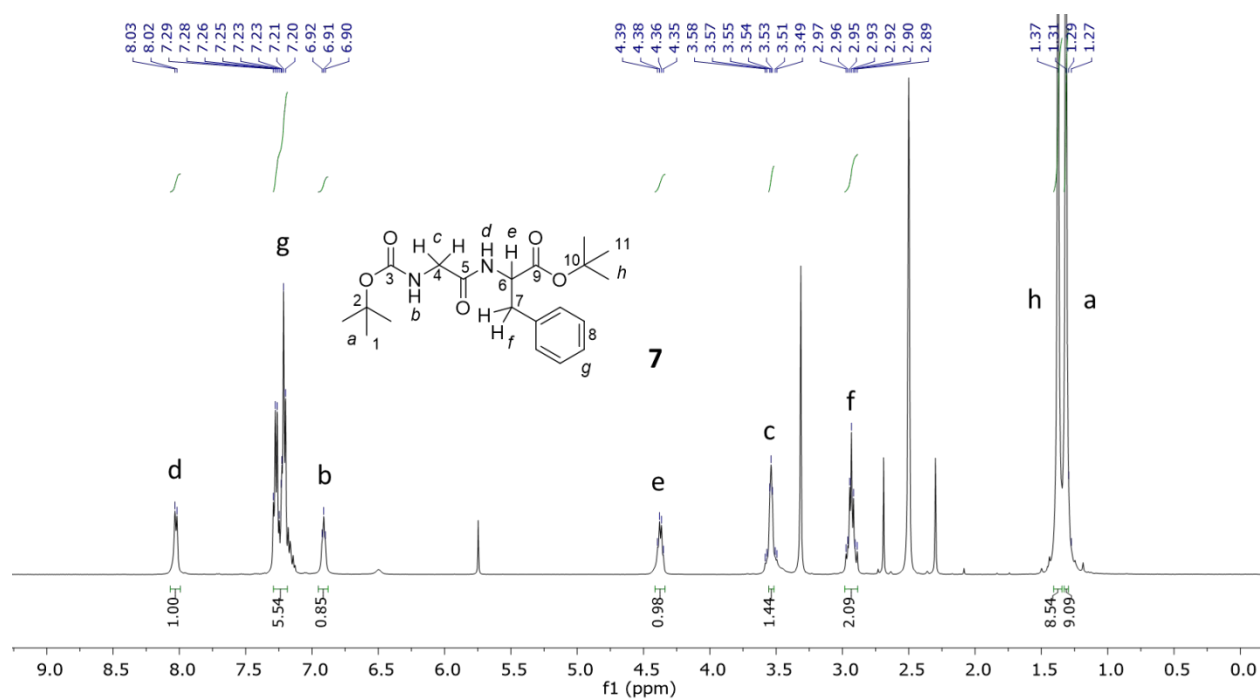

**Figure S16.**  $^1H$  NMR (500 MHz,  $d_6$ -DMSO) spectrum of Boc-Gly-Phe-O $t$ Bu **7**.

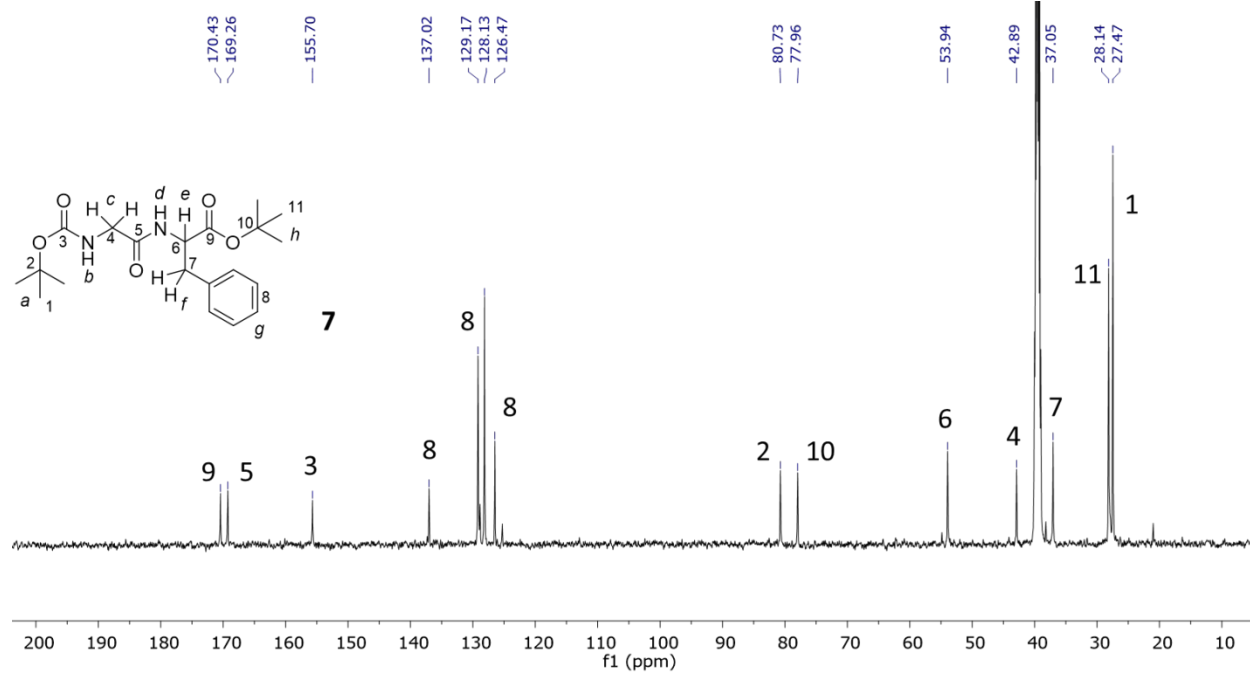

Figure S17.  $^{13}\text{C}$  NMR (126 MHz,  $d_6$ -DMSO) spectrum of Boc-Gly-Phe-O $t$ Bu 7.

1.1.8. Boc-Tyr-Phe-O $t$ Bu 8

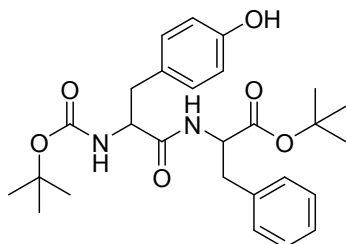

Yellow powder (63 % yield). **Melting point:** 77-84 °C.

$^1\text{H}$  NMR (500 MHz,  $d_6$ -DMSO)  $\delta$  9.12 (s, 1H), 8.15 (d,  $J$ = 7.5 Hz, 1H), 7.29 – 7.21 (m, 6H), 7.01 (d,  $J$ = 8.1 Hz, 2H), 6.73 (d,  $J$ = 8.7 Hz, 1H), 6.63 (d,  $J$ = 8.0 Hz, 2H), 4.36 (q,  $J$ = 7.3 Hz, 1H), 4.09 (td,  $J$ = 9.5, 4.0 Hz, 1H), 3.01 – 2.92 (m, 2H), 2.80 (dd,  $J$ = 14.0, 4.1 Hz, 1H), 2.58 (dd,  $J$ = 13.9, 10.3 Hz, 1H), 1.31 (s, 9H), 1.30 (s, 9H).

$^{13}\text{C}$  NMR (126 MHz,  $d_6$ -DMSO)  $\delta$  172.3, 170.9, 156.2, 155.6, 137.6, 130.5, 129.7, 129.4, 128.6, 127.0, 125.8, 115.3, 81.2, 78.4, 56.3, 54.5, 37.4, 37.1, 28.6, 28.0.

**HR-MS:**  $m/z$  for  $\text{C}_{27}\text{H}_{36}\text{N}_2\text{O}_6$  [ $\text{M} + \text{Na}$ ] $^+$  calculated 507.2400, found 507.2461.

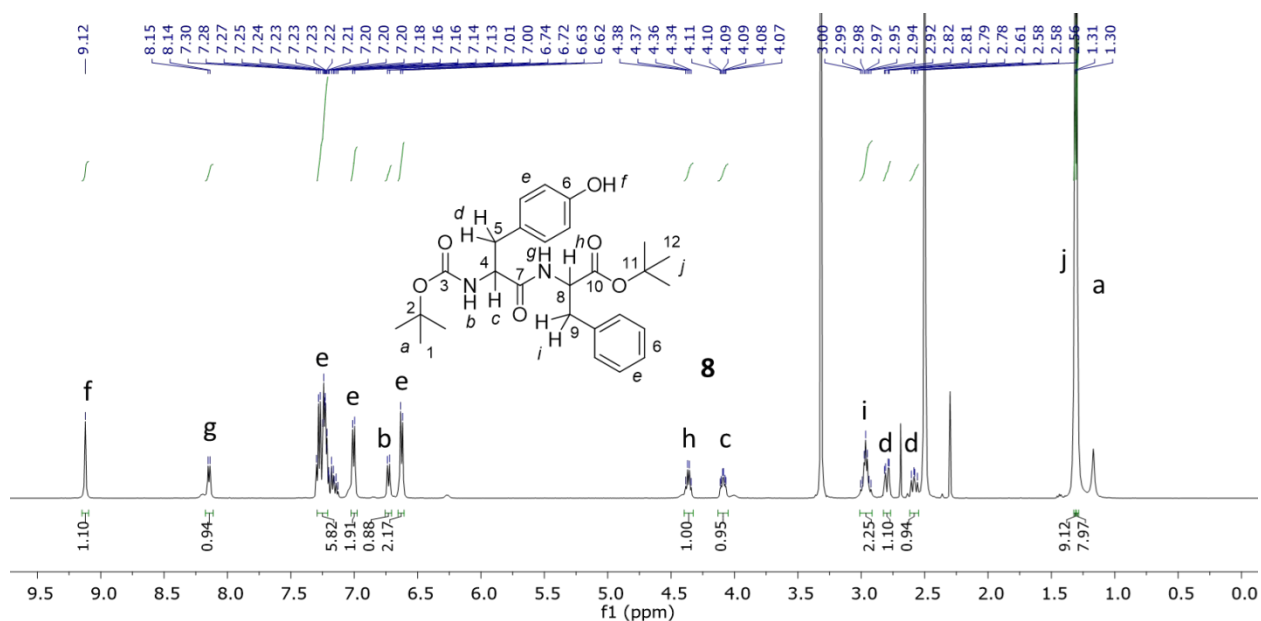

Figure S18.  $^1\text{H}$  NMR (500 MHz,  $d_6$ -DMSO) spectrum of Boc-Tyr-Phe-OtBu **8**.

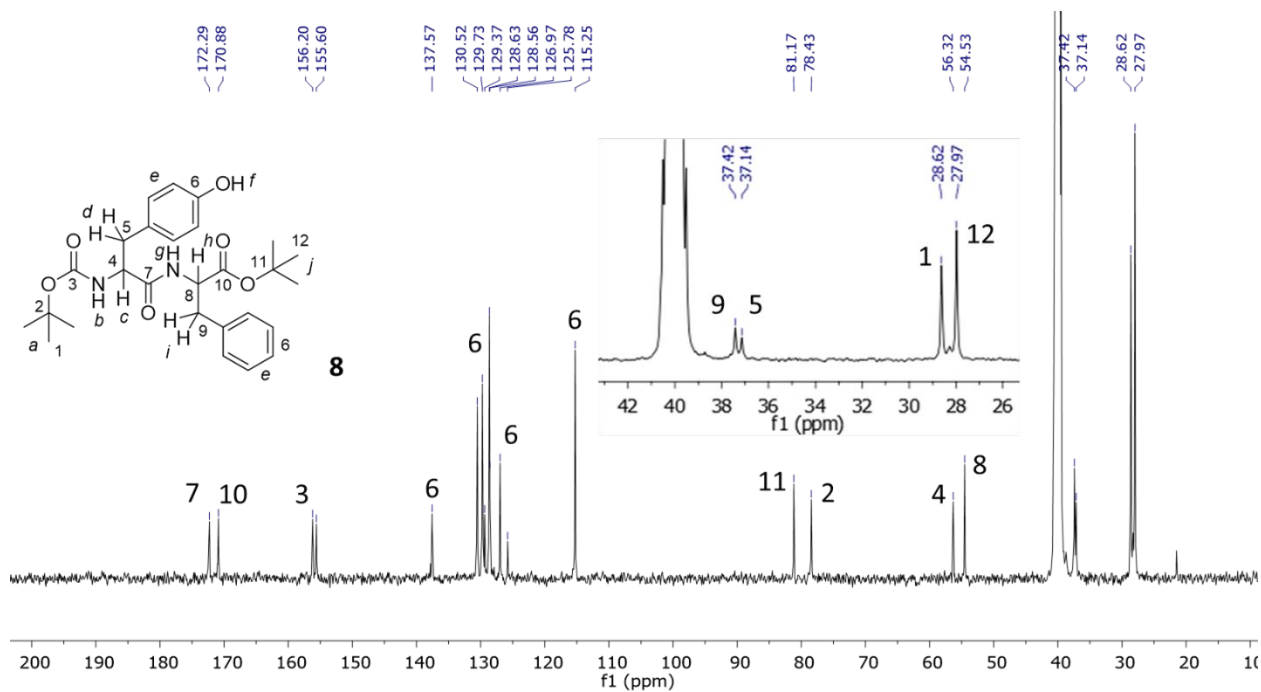

Figure S19.  $^{13}\text{C}$  NMR (126 MHz,  $d_6$ -DMSO) spectrum of Boc-Tyr-Phe-OtBu **8**.

## 1.2. Synthesis of monoprotected compounds 1a-3a

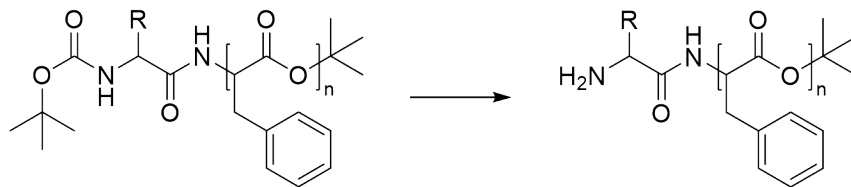

General protocol: Boc-protected precursor (1.0 equivalent) was suspended in *t*BuOAc at a concentration of 0.2 M. Concentrated H<sub>2</sub>SO<sub>4</sub> (5.0 equivalent) was then added dropwise at R.T. After 1 hour, the reaction mixture was neutralised with a saturated solution of NaHCO<sub>3</sub> and extracted with ethyl acetate. The organic phase was then dried with MgSO<sub>4</sub> and evaporated under vacuum, yielding the desired compounds.

### 1.2.1. Phe-Phe-O*t*Bu 1a

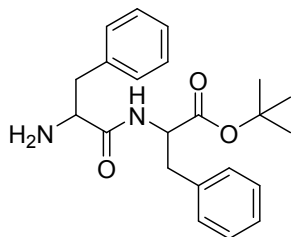

Yellow powder (95 % yield). **Melting point:** 63-67 °C.

**<sup>1</sup>H NMR** (500 MHz, *d*<sub>6</sub>-DMSO) δ 8.16 (d, *J* = 8.0 Hz, 1H), 7.30 – 7.12 (m, 10H), 4.43 (q, *J* = 7.2 Hz, 1H), 3.40 (dd, *J* = 8.4, 4.6 Hz, 1H), 2.92 (dd, *J* = 22.4, 5.8 Hz, 3H), 2.59 – 2.55 (m, 1H), 1.65 (s, 2H), 1.33 (s, 9H).

**<sup>13</sup>C NMR** (126 MHz, *d*<sub>6</sub>-DMSO) δ 174.2, 170.6, 138.7, 137.1, 129.5, 129.4, 128.3, 128.2, 126.7, 126.3, 81.0, 55.9, 53.6, 40.9, 37.4, 27.7.

**HR-MS:** *m/z* for C<sub>22</sub>H<sub>28</sub>N<sub>2</sub>O<sub>3</sub> [M + H]<sup>+</sup> calculated 369.2100, found 369.2161.

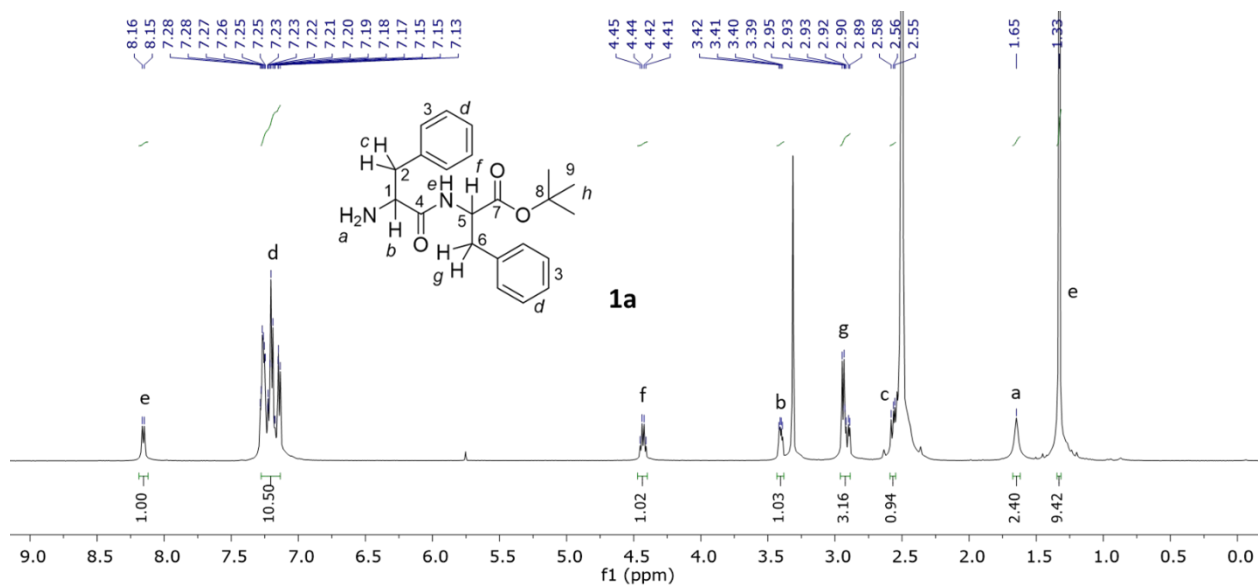

**Figure S20.**  $^1\text{H}$  NMR (500 MHz,  $d_6$ -DMSO) spectrum of Phe-Phe-O*t*Bu **1a**.

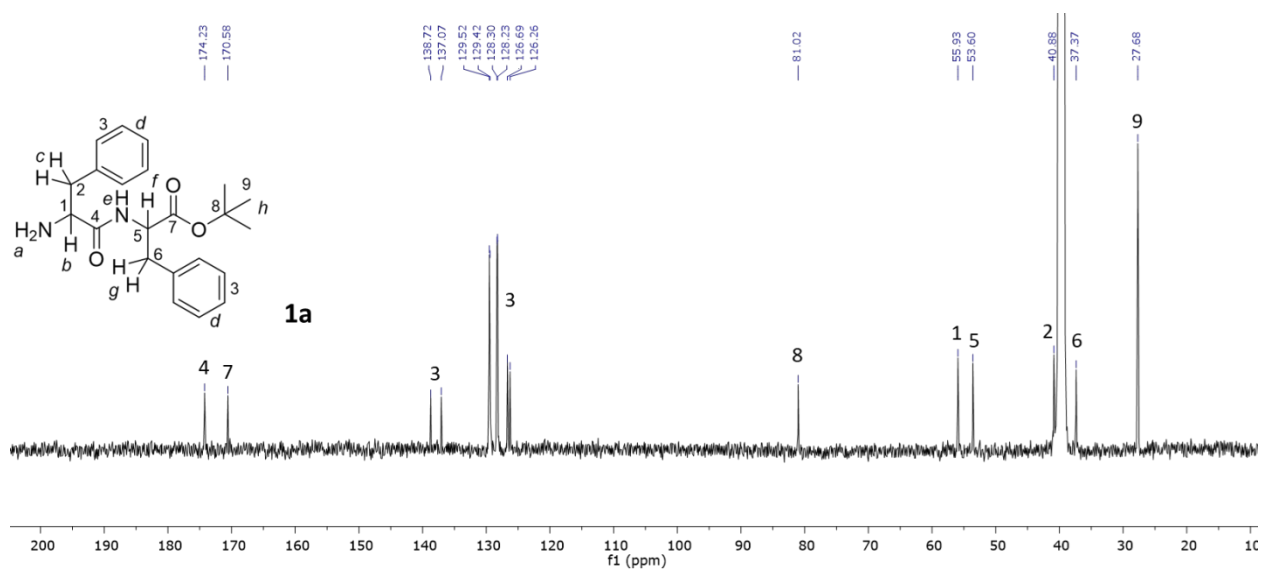

**Figure S21.**  $^{13}\text{C}$  NMR (126 MHz,  $d_6$ -DMSO) spectrum of Phe-Phe-O*t*Bu **1a**.

### 1.2.2. Phe-Phe-Phe-O*t*Bu 2a

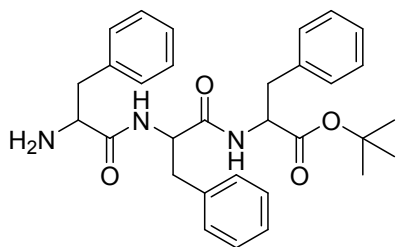

Colourless powder (95 % yield). **Melting point:** 184-187 °C.

$^1\text{H NMR}$  (500 MHz,  $d_6$ -DMSO)  $\delta$  8.55 (d,  $J = 7.5$  Hz, 1H), 8.40 (s, 1H), 7.31 – 7.16 (m, 15H), 4.64 (td,  $J = 8.6, 4.5$  Hz, 1H), 4.40 (q,  $J = 7.5$  Hz, 1H), 3.66 (s, 1H), 3.05 – 2.90 (m, 4H), 2.81 (dd,  $J = 13.9, 8.9$  Hz, 1H), 2.70 – 2.62 (m, 1H), 1.32 (s, 9H).

$^{13}\text{C NMR}$  (126 MHz,  $d_6$ -DMSO)  $\delta$  171.2, 170.9, 137.8, 137.5, 129.9, 129.8, 129.7, 128.8, 128.7, 128.5, 127.1, 127.0, 126.8, 81.2, 55.0, 54.7, 53.7, 38.4, 37.4, 28.0.

**HR-MS:**  $m/z$  for  $\text{C}_{31}\text{H}_{37}\text{N}_3\text{O}_4$   $[\text{M} + \text{H}]^+$  calculated 516.2800, found 516.2876.

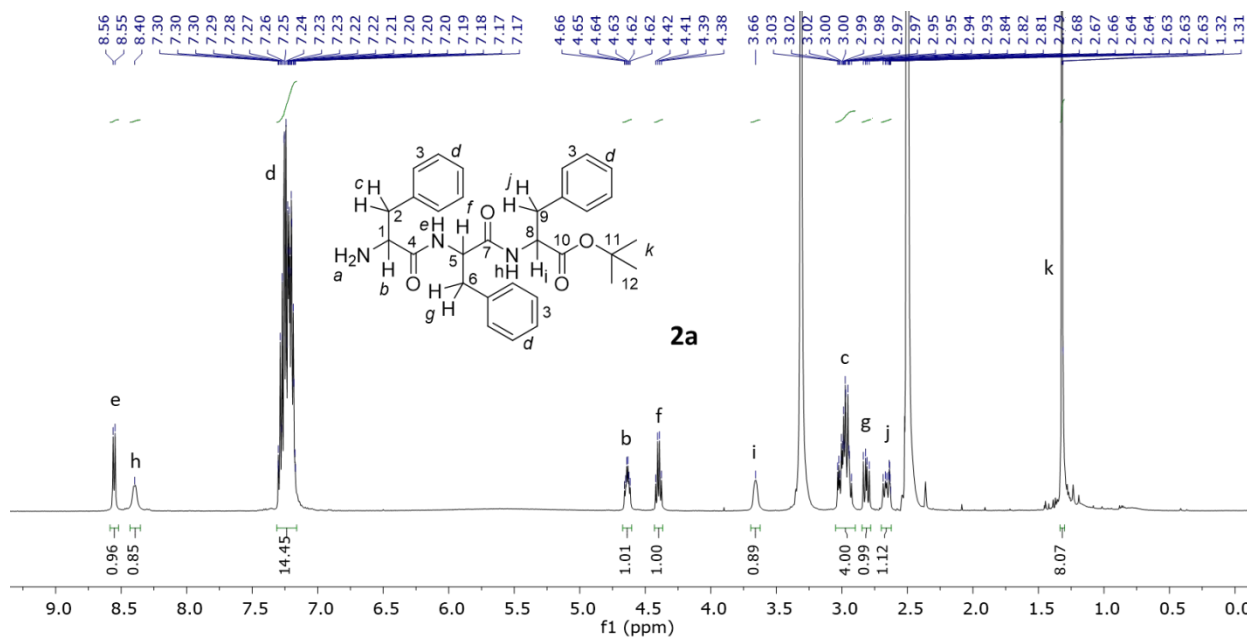

**Figure S22.**  $^1\text{H NMR}$  (500 MHz,  $d_6$ -DMSO) spectrum of Phe-Phe-Phe-O*t*Bu 2a.

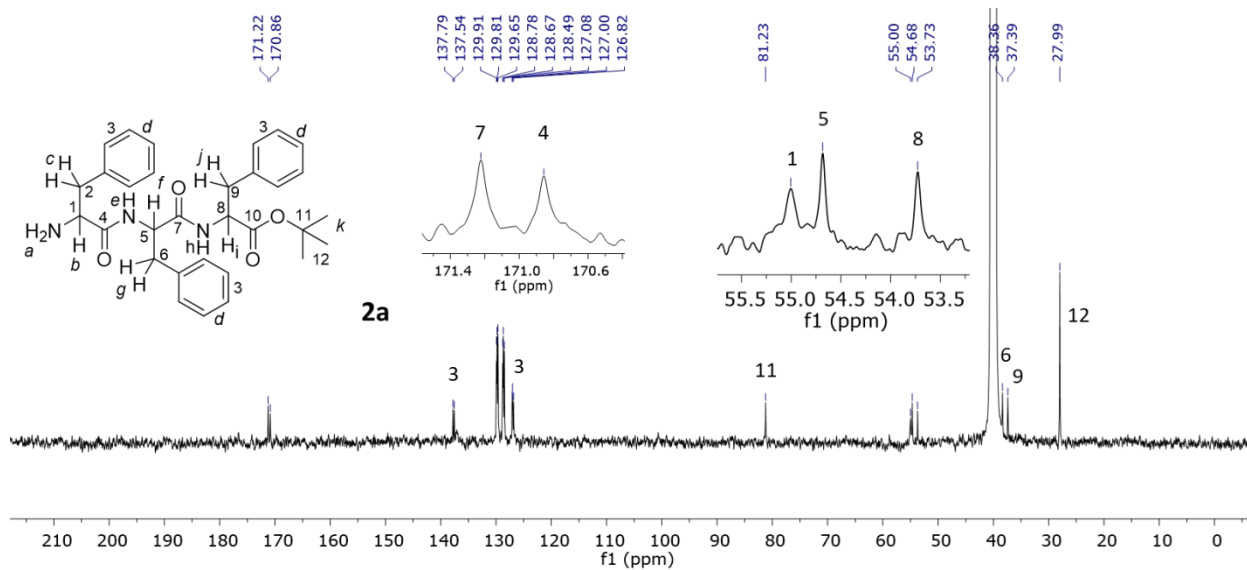

**Figure S23.**  $^{13}\text{C}$  NMR (126 MHz,  $d_6$ -DMSO) spectrum of Phe-Phe-Phe-OtBu **2a**.

### 1.2.3. Leu-Phe-OtBu **3a**

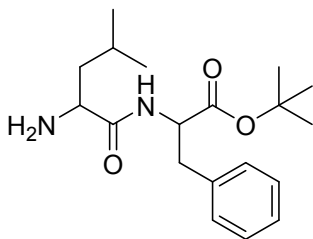

Yellow powder (78 % yield). **Melting point:** 88-93 °C.

$^1\text{H}$  NMR (500 MHz,  $d_6$ -DMSO)  $\delta$  8.13 (d,  $J$  = 8.0 Hz, 1H), 7.30 – 7.17 (m, 5H), 4.41 (q,  $J$  = 7.3 Hz, 1H), 3.15 (dd,  $J$  = 9.0, 5.3 Hz, 1H), 2.96 (qd,  $J$  = 13.7, 7.1 Hz, 2H), 1.82 (d,  $J$  = 25.1 Hz, 2H), 1.66 (dq,  $J$  = 13.3, 6.8 Hz, 1H), 1.33 (s, 9H), 1.14 (ddd,  $J$  = 14.0, 8.9, 5.9 Hz, 1H), 0.84 (dd,  $J$  = 19.2, 6.6 Hz, 6H).

$^{13}\text{C}$  NMR (126 MHz,  $d_6$ -DMSO)  $\delta$  175.3, 170.5, 137.0, 129.2, 128.1, 126.5, 80.7, 53.4, 52.8, 44.1, 37.1, 27.5, 24.0, 23.2, 21.8.



HR-MS:  $m/z$  for  $C_{19}H_{30}N_2O_3$   $[M + H]^+$  calculated 335.2300, found 335.2327.

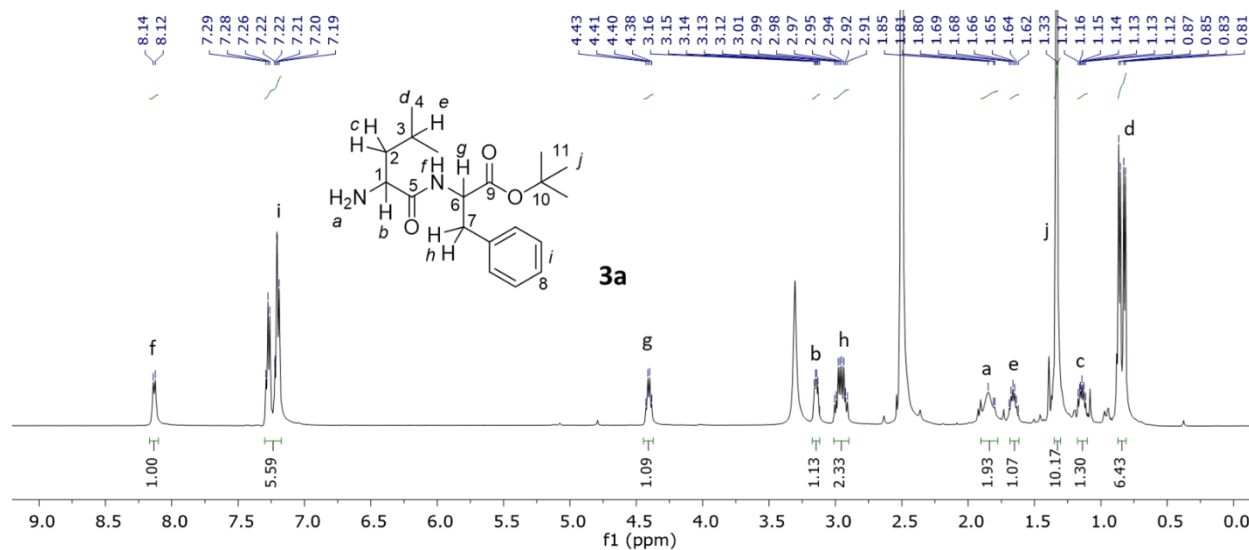

**Figure S24.**  $^1H$  NMR (500 MHz,  $d_6$ -DMSO) spectrum of Leu-Phe-OtBu **3a**.

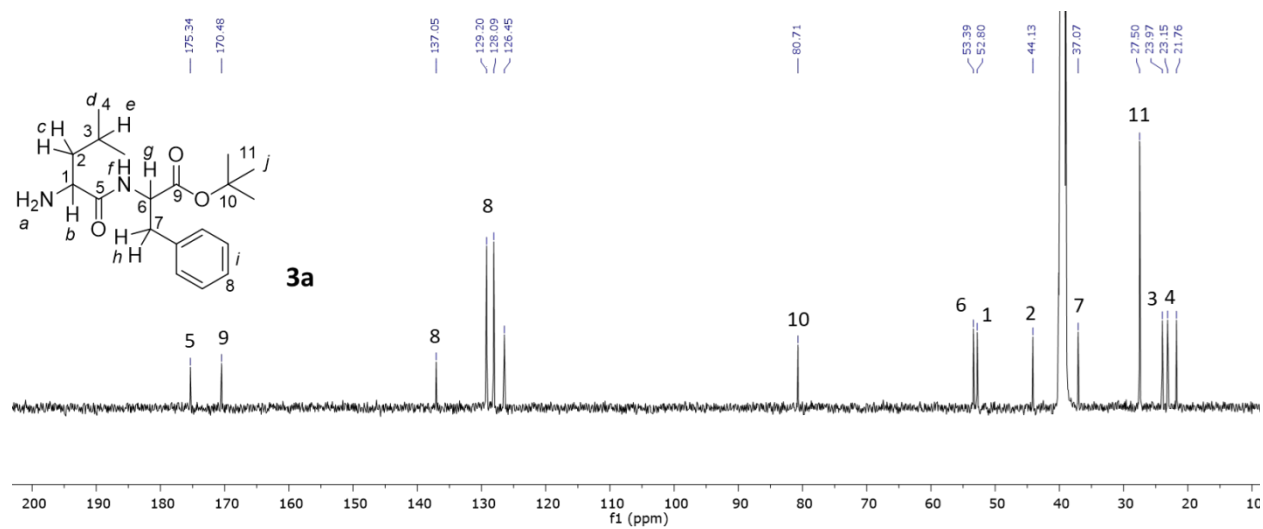

**Figure S25.**  $^{13}C$  NMR (126 MHz,  $d_6$ -DMSO) spectrum of Leu-Phe-OtBu **3a**.

## 2 Gelation and gel characterization

### 2.1 Gelation protocol

Gel systems **I**, **II** and **III**: The precursor gelator (**1**, **2**, and **3**, respectively) was suspended in *t*BuOAc solvent (0.05M) and sonicated until a fine suspension formed, followed by the addition of concentrated H<sub>2</sub>SO<sub>4</sub> (1.0 equivalent). The mixture was gently swirled and left to rest at R.T. for at least 12 h. Gelation was verified by the vial inversion method.

Gel system **IV**: The precursor gelators **1** and **2** were suspended in *t*BuOAc (1:1 ratio, final concentration 0.05 M) and sonicated until a fine suspension formed, followed by the addition of concentrated H<sub>2</sub>SO<sub>4</sub> (1.0 equivalent). The mixture was gently swirled and left to rest at R.T. for at least 12 h. Gelation was verified by the vial inversion method.



## 2.2 Gel characterization by NMR

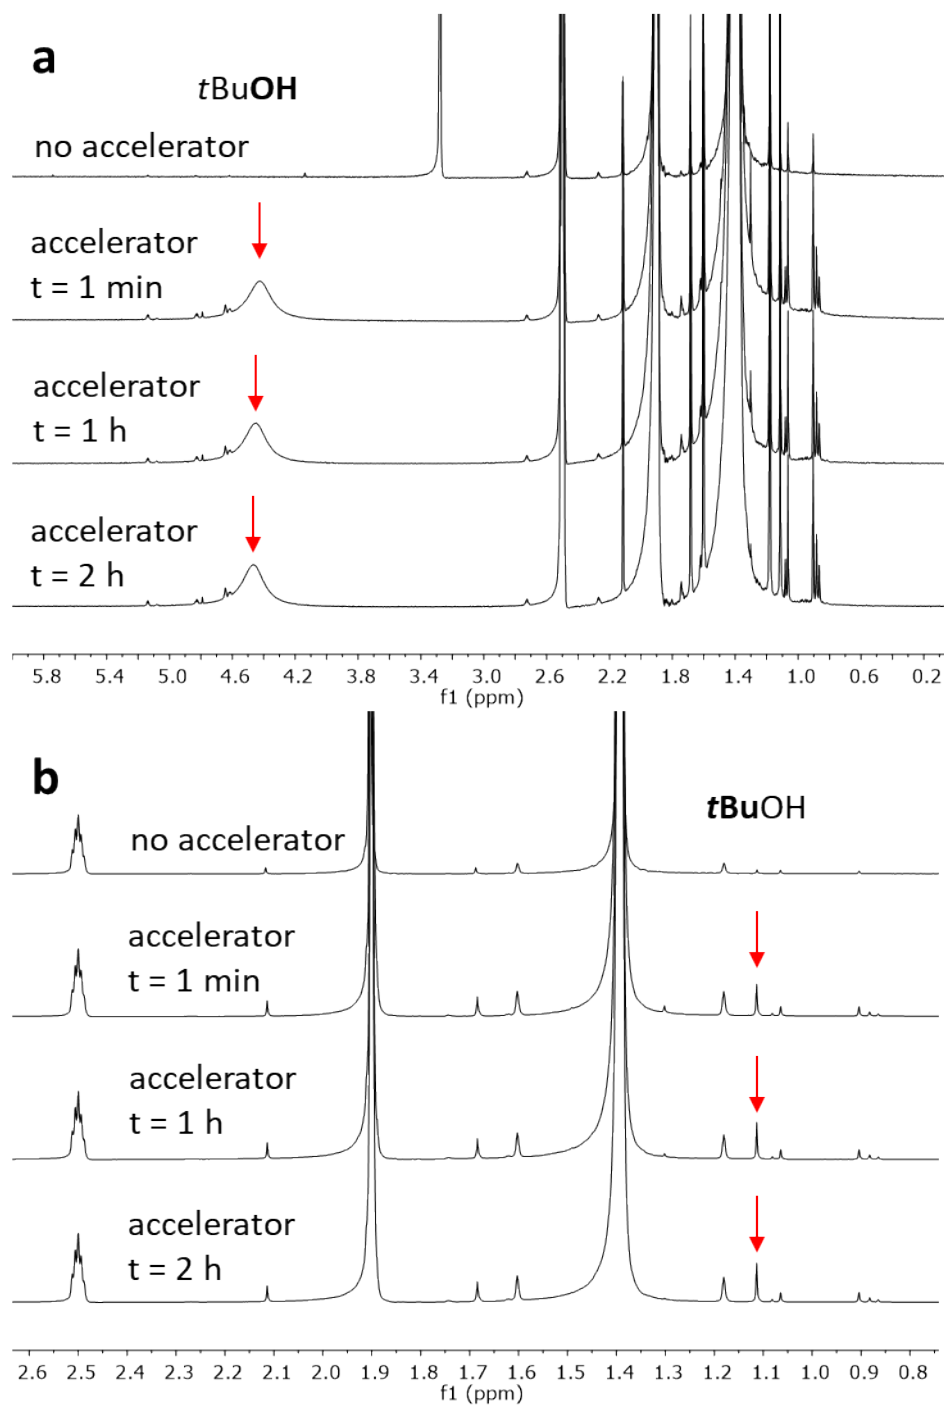

**Figure S26.**  $^1\text{H}$  NMR (300 MHz,  $d_6$ -DMSO) spectrum of  $t\text{BuOAc}$  solvent in a) hydroxyl region and b) methyl region. Before addition of accelerator (top rows) and hourwise monitoring.

## 2.2.1 Gel system I: Precursor Boc-Phe-Phe-O $\overline{t}$ Bu 1

0.05 M, 1.0 eq H<sub>2</sub>SO<sub>4</sub>, day 1

<sup>1</sup>H NMR (300 MHz, *d*<sub>6</sub>-DMSO)  $\delta$  8.89 (d, *J* = 7.5 Hz, 1H), 8.83 (d, *J* = 7.8 Hz, 1H), 8.05 (d, *J* = 7.3 Hz, 6H), 7.37 – 7.21 (m, 20H), 4.58 – 4.46 (m, 1H), 4.04 (s, 2H), 3.13 (ddd, *J* = 13.8, 10.7, 5.4 Hz, 3H), 3.02 – 2.89 (m, 3H), 1.32 (s, 9H).

<sup>13</sup>C NMR (75 MHz, *d*<sub>6</sub>-DMSO)  $\delta$  172.7, 170.4, 168.6, 168.6, 137.6, 137.2, 135.1, 135.1, 130.1, 129.7, 129.6, 129.0, 128.8, 128.8, 127.7, 127.7, 127.2, 127.2, 81.7, 54.9, 54.3, 53.6, 37.5, 37.4, 37.2, 28.0.

HR-MS: *m/z* for C<sub>22</sub>H<sub>28</sub>N<sub>2</sub>O<sub>3</sub> [M + H]<sup>+</sup> calculated 369.2100, found 369.2164. *m/z* for C<sub>18</sub>H<sub>20</sub>N<sub>2</sub>O<sub>3</sub> [M + H]<sup>+</sup> calculated 313.1500, found 313.1536.

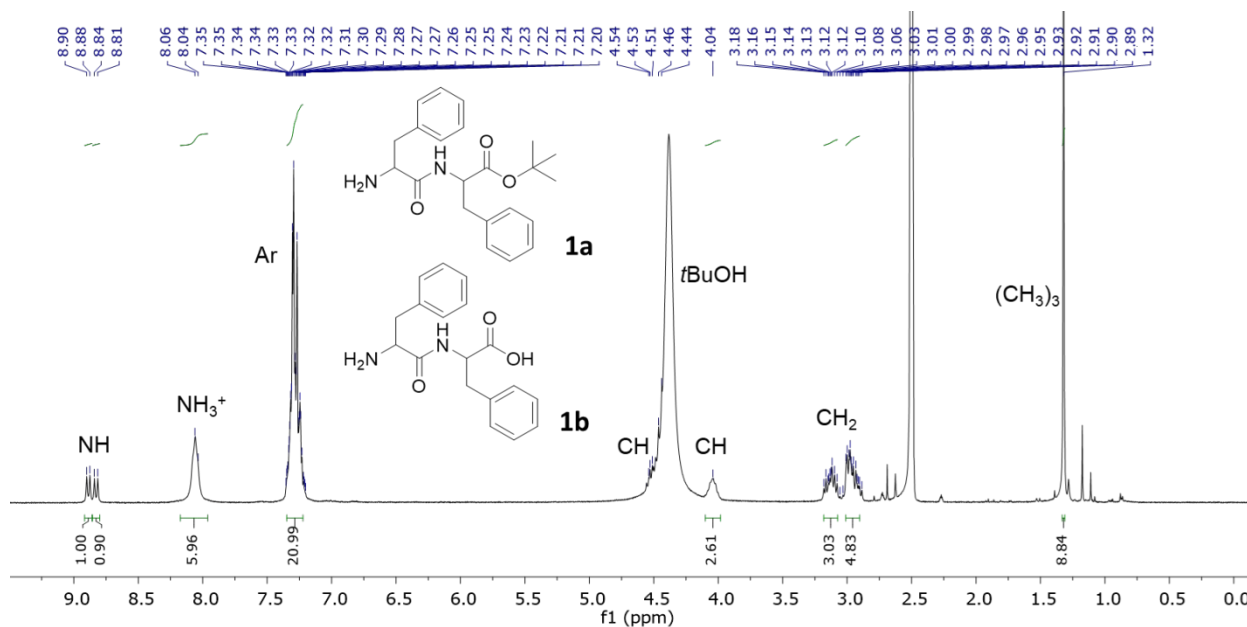

Figure S27. <sup>1</sup>H NMR (300 MHz, *d*<sub>6</sub>-DMSO) spectrum of xerogel I, 0.05M, 1.0 equivalent of H<sub>2</sub>SO<sub>4</sub>, day 1.

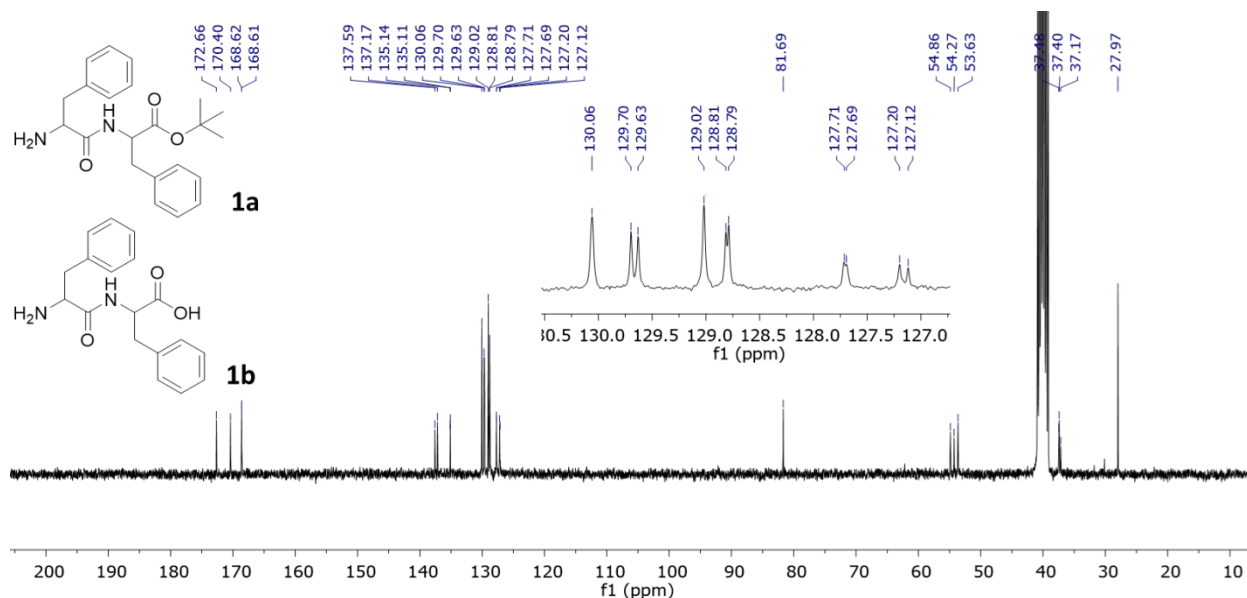

**Figure S28.**  $^{13}\text{C}$  NMR (75 MHz,  $d_6$ -DMSO) spectrum of xerogel I, 0.05M, 1.0 equivalent of  $\text{H}_2\text{SO}_4$ , day 1.

*0.05 M, 0.5 eq  $\text{H}_2\text{SO}_4$ , day 1*

$^1\text{H}$  NMR (300 MHz,  $d_6$ -DMSO)  $\delta$  8.89 (d,  $J = 7.5$  Hz, 1H), 8.19 (d,  $J = 7.5$  Hz, 0.6H), 8.07 (s, 3H), 7.36 – 7.17 (m, 18H), 6.82 (d,  $J = 8.6$  Hz, 0.6H), 4.47 (t,  $J = 7.3$  Hz, 1H), 4.19 (s, 1H), 4.05 (s, 1H), 3.02 – 2.87 (m, 6H), 2.75 – 2.63 (m, 1H), 1.32 (d,  $J = 2.1$  Hz, 15H), 1.28 (s, 5H). Note: Presence of precursor marked by a star.

$^{13}\text{C}$  NMR (126 MHz,  $d_6$ -DMSO)  $\delta$  169.9, 168.1, 136.7, 134.6, 129.6, 129.2, 128.5, 128.3, 127.2, 126.7, 81.2, 54.4, 53.1, 37.0, 36.9, 27.5.

**HR-MS:**  $m/z$  for  $\text{C}_{22}\text{H}_{28}\text{N}_2\text{O}_3$  [ $\text{M} + \text{H}$ ] $^+$  calculated 369.2100, found 369.2172.  $m/z$  for  $\text{C}_{18}\text{H}_{20}\text{N}_2\text{O}_3$  [ $\text{M} + \text{H}$ ] $^+$  calculated 313.1500, found 313.1564.  $m/z$  for  $\text{C}_{27}\text{H}_{36}\text{N}_2\text{O}_5$  [ $\text{M} + \text{K}$ ] $^+$  calculated 507.3500, found 507.2262.

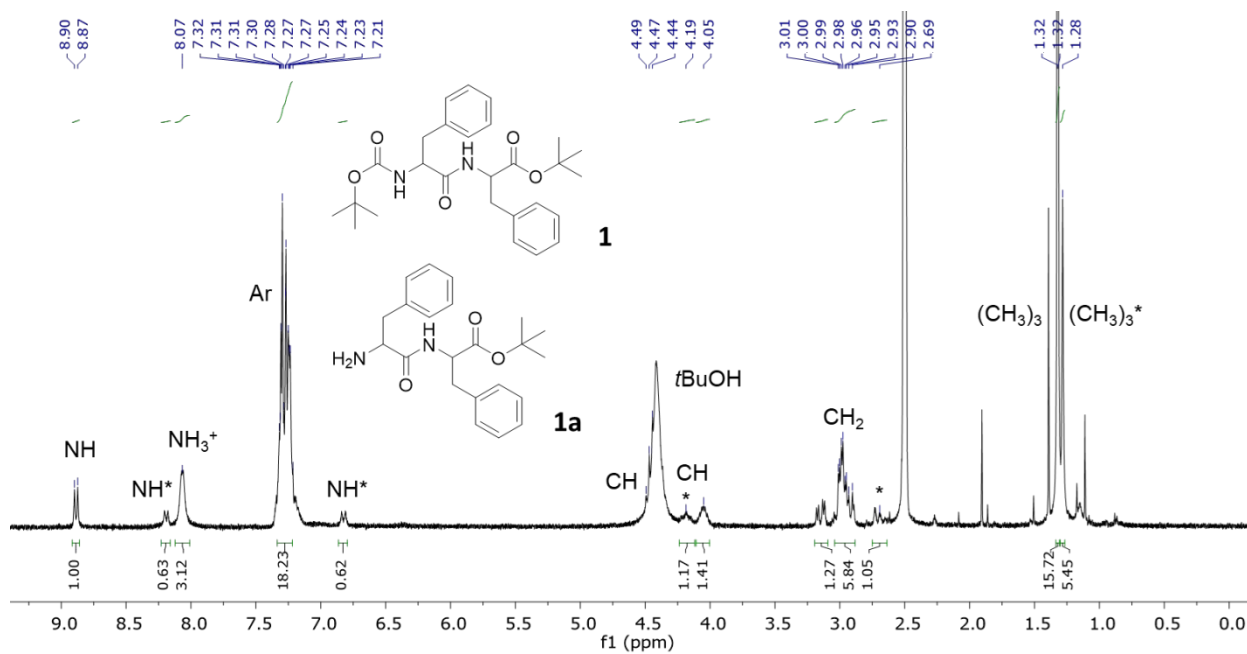

**Figure S29.**  $^1\text{H}$  NMR (300 MHz,  $d_6$ -DMSO) spectrum of xerogel I, 0.05M, 0.5 equivalent of  $\text{H}_2\text{SO}_4$ , day 1.

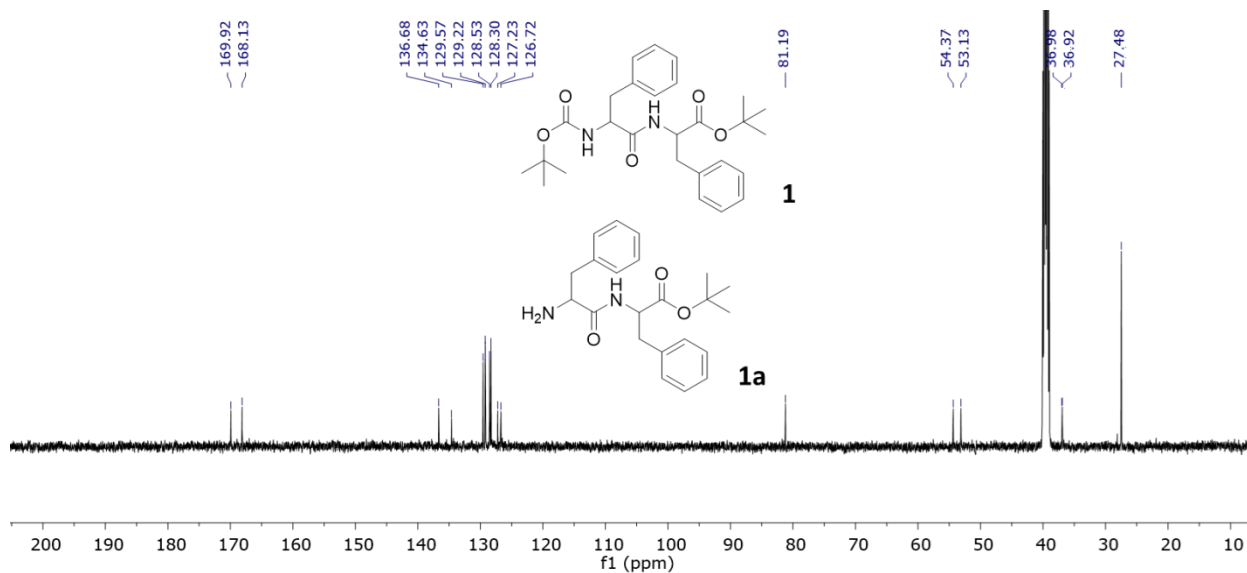

**Figure S30.**  $^{13}\text{C}$  NMR (126 MHz,  $d_6$ -DMSO) spectrum of xerogel I, 0.05M, 0.5 equivalent of  $\text{H}_2\text{SO}_4$ , day 1.

## 2.2.2 Gel system II: Precursor Boc-Phe-Phe-Phe-O $\beta$ Bu 2

*0.05 M, 1.0 eq H<sub>2</sub>SO<sub>4</sub>, day 1*

**<sup>1</sup>H NMR** (500 MHz, *d*<sub>6</sub>-DMSO)  $\delta$  8.73 (d, *J* = 8.3 Hz, 1H), 8.70 (d, *J* = 8.4 Hz, 0.2H), 8.61 (d, *J* = 7.5 Hz, 1H), 8.53 (d, *J* = 7.9 Hz, 0.2H), 8.33 (d, *J* = 7.7 Hz, 0.1H), 8.22 (d, *J* = 7.9 Hz, 0.1H), 7.98 (d, *J* = 5.5 Hz, 3.5H), 7.32 – 7.20 (m, 20H), 4.65 (tt, *J* = 9.7, 4.7 Hz, 1H), 4.50 (dt, *J* = 8.2, 3.9 Hz, 0.4H), 4.42 (q, *J* = 7.5 Hz, 1H), 4.35 (d, *J* = 7.4 Hz, 0.2H), 3.13 – 2.78 (m, 8H), 1.32 (s, 9H). Note: Presence of a rotamer (peaks at 8.33 ppm and 8.22 ppm), as described in section 2.1.2.

**<sup>13</sup>C NMR** (126 MHz, *d*<sub>6</sub>-DMSO)  $\delta$  172.0, 170.6, 170.3, 167.9, 137.3, 137.0, 134.6, 129.6, 129.3, 129.2, 128.5, 128.2, 128.1, 127.1, 126.5, 126.4, 80.8, 66.9, 54.2, 53.8, 53.1, 37.8, 37.0, 36.9, 31.3, 27.8, 27.5, 21.1.

**HR-MS:** *m/z* for C<sub>31</sub>H<sub>37</sub>N<sub>3</sub>O<sub>4</sub> [M + H]<sup>+</sup> calculated 516.2800, found 516.2865. *m/z* for C<sub>27</sub>H<sub>29</sub>N<sub>3</sub>O<sub>4</sub> [M + H]<sup>+</sup> calculated 460.2200, found 460.2240.



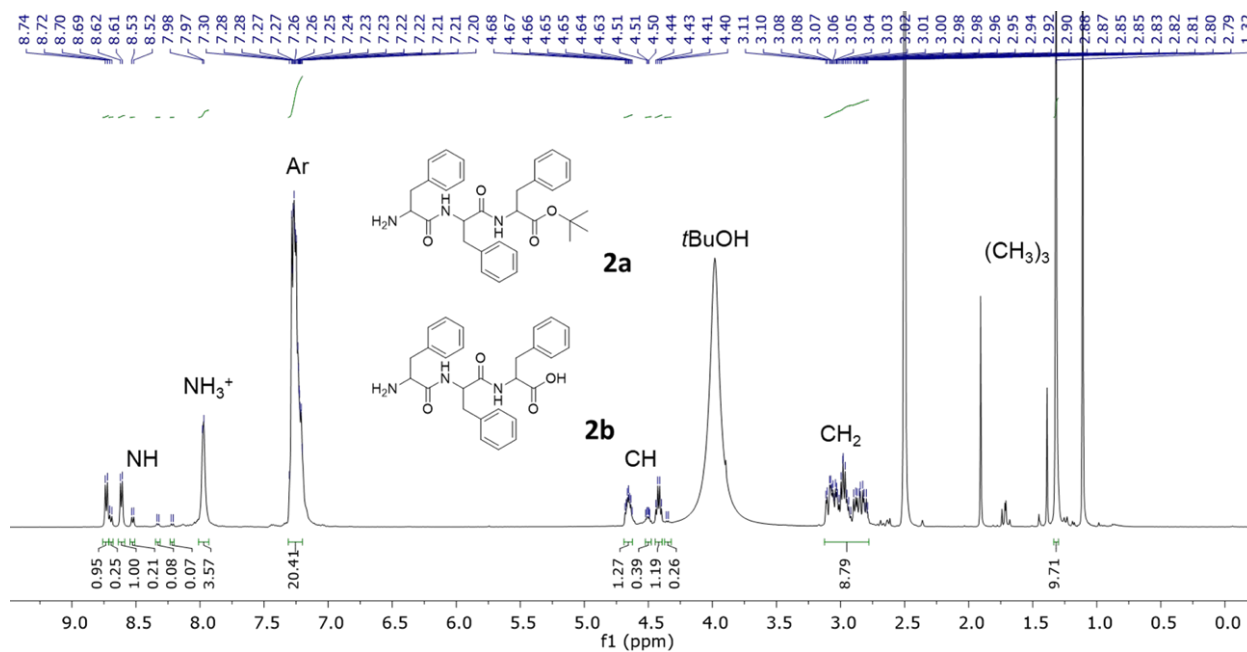

Figure S31.  $^1\text{H}$  NMR (500 MHz,  $d_6$ -DMSO) spectrum of xerogel II, 0.05M, 1.0 equivalent of  $\text{H}_2\text{SO}_4$ , day 1. Presence of a rotamer.

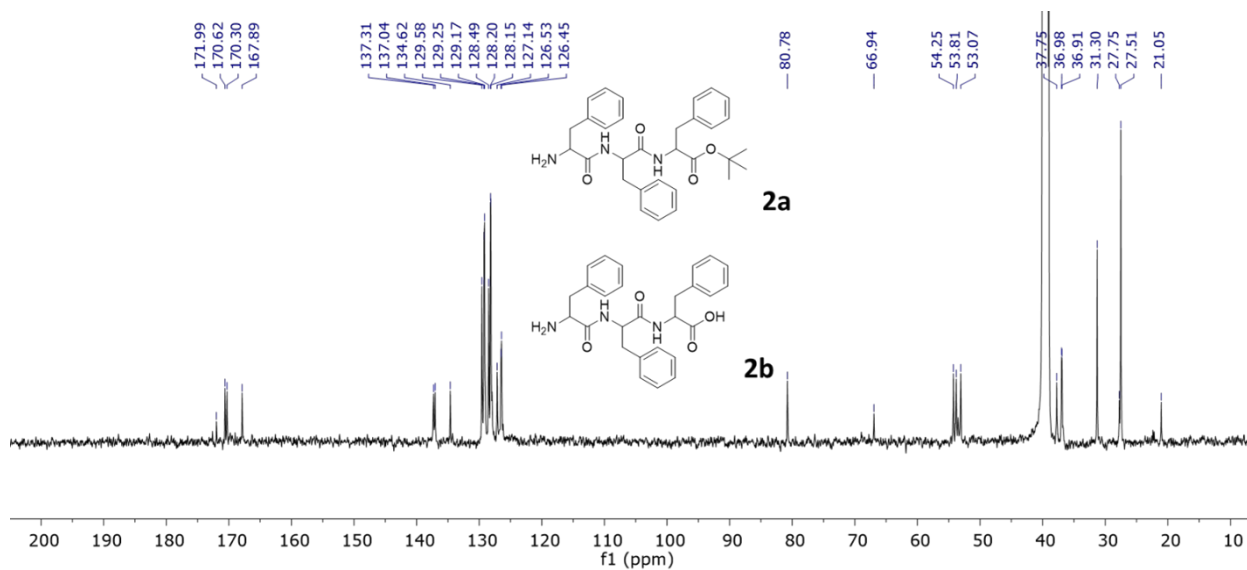

Figure S32.  $^{13}\text{C}$  NMR (126 MHz,  $d_6$ -DMSO) spectrum of xerogel II, 0.05M, 1.0 equivalent of  $\text{H}_2\text{SO}_4$ , day 1.

0.05 M, 0.5 eq H<sub>2</sub>SO<sub>4</sub>, day 1

<sup>1</sup>H NMR (500 MHz, d<sub>6</sub>-DMSO) δ 8.7 (d, *J* = 8.3 Hz, 1H), 8.7 – 8.7 (m, 0.1H), 8.6 (d, *J* = 7.4 Hz, 1H), 8.6 – 8.5 (m, 0.1H), 8.5 (d, *J* = 7.4 Hz, 0.2H), 8.3 (d, *J* = 7.7 Hz, 0.1H), 8.1 – 8.0 (m, 0.2H), 8.0 (d, *J* = 5.3 Hz, 3H), 7.9 (d, *J* = 8.4 Hz, 0.3H), 7.3 – 7.2 (m, 21H), 6.8 (d, *J* = 8.8 Hz, 0.2H), 4.7 (td, *J* = 8.8, 4.4 Hz, 1H), 4.6 – 4.6 (m, 0.3H), 4.4 (q, *J* = 7.4 Hz, 1H), 4.4 (dd, *J* = 12.5, 5.1 Hz, 0.4H), 4.1 (d, *J* = 11.5 Hz, 0.6H), 4.0 (dt, *J* = 9.6, 4.7 Hz, 2H), 3.1 – 2.8 (m, 7H), 1.3 (s, 8H), 1.3 (s, 3.3H), 1.3 (s, 1.5H). Note: Presence of precursor marked by a star.

<sup>13</sup>C NMR (126 MHz, d<sub>6</sub>-DMSO) δ 170.6, 170.3, 167.9, 137.3, 137.0, 134.6, 129.6, 129.3, 129.2, 128.5, 128.2, 128.1, 127.9, 127.1, 126.5, 126.4, 80.8, 54.2, 53.8, 53.1, 37.7, 37.0, 36.9, 31.3, 28.1, 27.7, 27.5.

HR-MS: *m/z* for C<sub>36</sub>H<sub>45</sub>N<sub>3</sub>O<sub>6</sub> [M + H]<sup>+</sup> calculated 616.3300, found 616.3286. *m/z* for C<sub>31</sub>H<sub>37</sub>N<sub>3</sub>O<sub>4</sub> [M + H]<sup>+</sup> calculated 516.2800, found 516.2785. *m/z* for C<sub>27</sub>H<sub>29</sub>N<sub>3</sub>O<sub>4</sub> [M + H]<sup>+</sup> calculated 460.2200, found 460.2153.

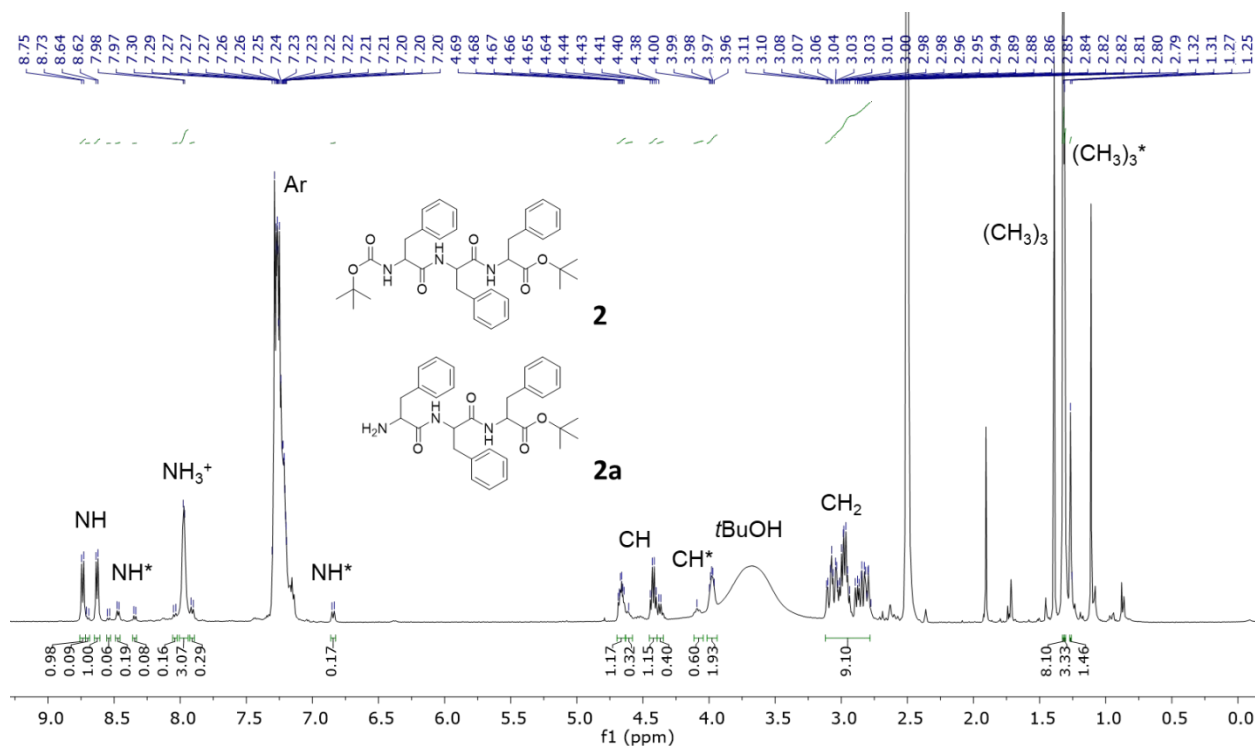

Figure S33. <sup>1</sup>H NMR (500 MHz, d<sub>6</sub>-DMSO) spectrum of xerogel II, 0.05M, 0.5 equivalent of H<sub>2</sub>SO<sub>4</sub>, day 1.

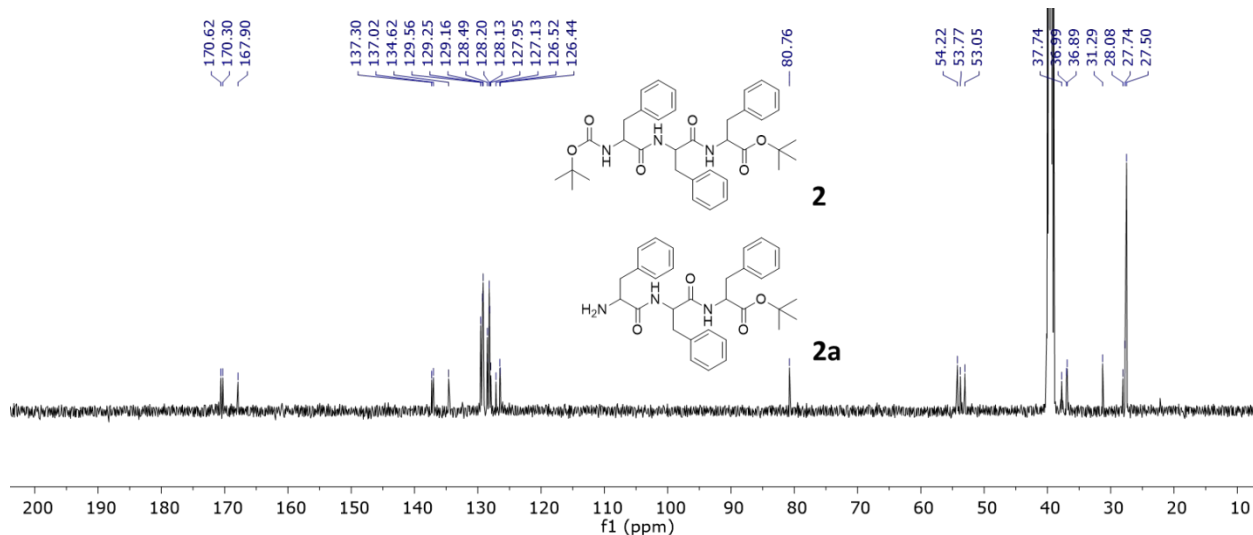

**Figure S34.**  $^{13}\text{C}$  NMR (126 MHz,  $d_6$ -DMSO) spectrum of xerogel **II**, 0.05M, 0.5 equivalent of  $\text{H}_2\text{SO}_4$ , day 1.

*0.05 M, 1.0 eq of  $\text{H}_2\text{SO}_4$ , day 5*

$^1\text{H}$  NMR (300 MHz,  $d_6$ -DMSO)  $\delta$  8.72 (d,  $J = 8.5$  Hz, 1H), 8.67 (s, 0.2H), 8.60 (d,  $J = 7.5$  Hz, 1H), 8.51 (d,  $J = 7.9$  Hz, 0.2H), 8.31 (d,  $J = 7.4$  Hz, 0.1H), 8.20 (d,  $J = 7.9$  Hz, 0.1H), 8.02 – 7.93 (m, 4H), 7.25 (qd,  $J = 8.4, 7.0, 3.9$  Hz, 22H), 4.66 (td,  $J = 8.7, 4.4$  Hz, 1H), 3.98 (s, 1H), 3.15 – 2.76 (m, 5H), 1.32 (s, 9H).

$^{13}\text{C}$  NMR (75 MHz,  $d_6$ -DMSO)  $\delta$  173.1, 171.9, 171.1, 170.8, 169.5, 168.4, 137.8, 137.5, 135.1, 130.1, 129.7, 129.6, 129.0, 128.7, 128.6, 128.4, 127.6, 127.0, 126.9, 81.3, 67.4, 54.7, 54.3, 53.6, 37.4, 31.8, 28.0.

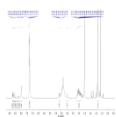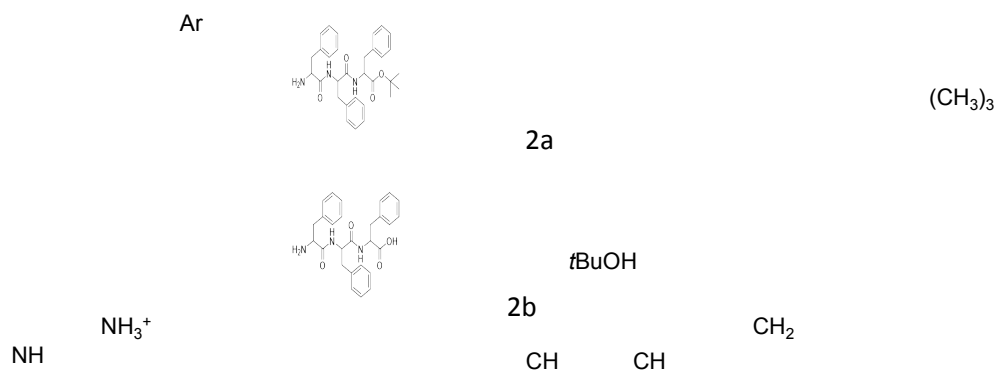

**Figure S35.**  $^1\text{H}$  NMR (300 MHz,  $d_6$ -DMSO) spectrum of xerogel **II**, 0.05M, 1.0 equivalent of  $\text{H}_2\text{SO}_4$ , day 5.

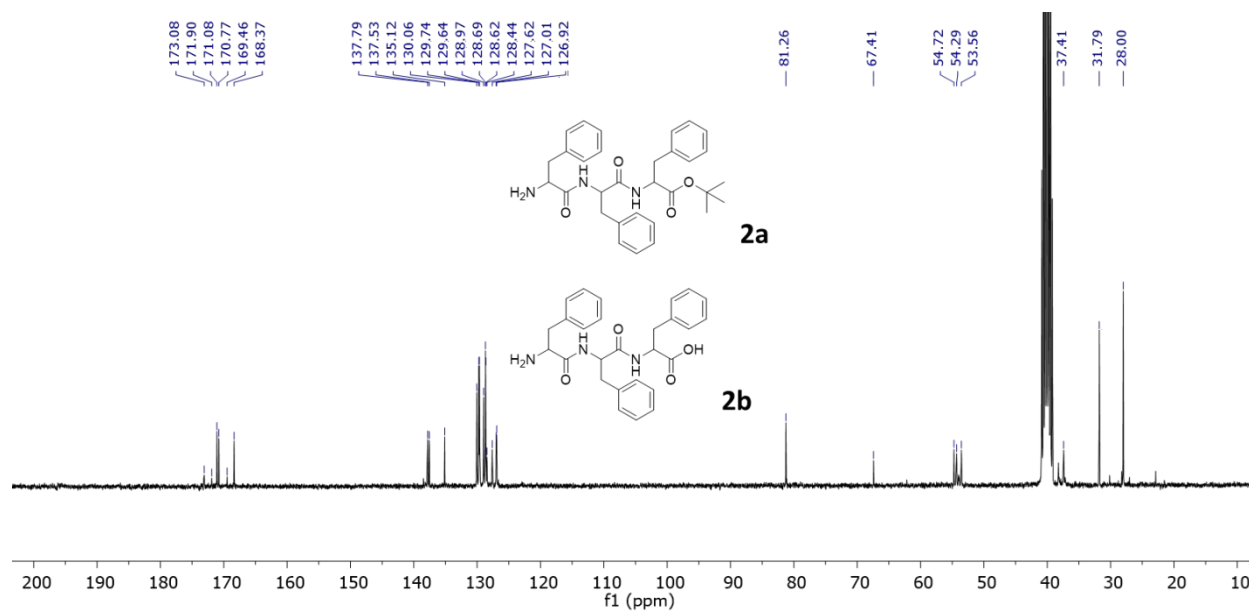

**Figure S36.**  $^1\text{H}$  NMR (126 MHz,  $d_6$ -DMSO) spectrum of xerogel **II**, 0.05M, 1.0 equivalent of  $\text{H}_2\text{SO}_4$ , day 5.

### 2.2.3. Gel system III: Precursor Boc-Leu-Phe-O $\text{t}$ Bu **3**

*0.05 M, 1.0 eq  $\text{H}_2\text{SO}_4$ , day 1*

$^1\text{H}$  NMR (300 MHz,  $d_6$ -DMSO)  $\delta$  8.83 (d,  $J = 7.4$  Hz, 1H), 8.76 (d,  $J = 7.6$  Hz, 0.7H), 8.06 (s, 5.2H), 7.35 – 7.21 (m, 8.8H), 4.54 – 4.39 (m, 1.9H), 3.76 (s, 1.7H), 3.14 – 2.92 (m, 3.8H), 1.67 (d,  $J = 6.9$  Hz, 2.4H), 1.55 (d,  $J = 7.5$  Hz, 3.8H), 1.31 (s, 9H), 0.95 – 0.86 (m, 10.9H).

$^{13}\text{C}$  NMR (75 MHz,  $d_6$ -DMSO)  $\delta$  172.2, 169.2, 137.2, 129.1, 128.3, 126.6, 53.8, 50.7, 36.5, 27.5, 23.4, 22.9, 21.7.

**HR-MS:**  $m/z$  for  $\text{C}_{19}\text{H}_{30}\text{N}_2\text{O}_3$   $[\text{M} + \text{H}]^+$  calculated 335.2300, found 335.2335.  $m/z$  for  $\text{C}_{15}\text{H}_{22}\text{N}_2\text{O}_3$   $[\text{M} + \text{H}]^+$  calculated 279.1600, found 279.1716.

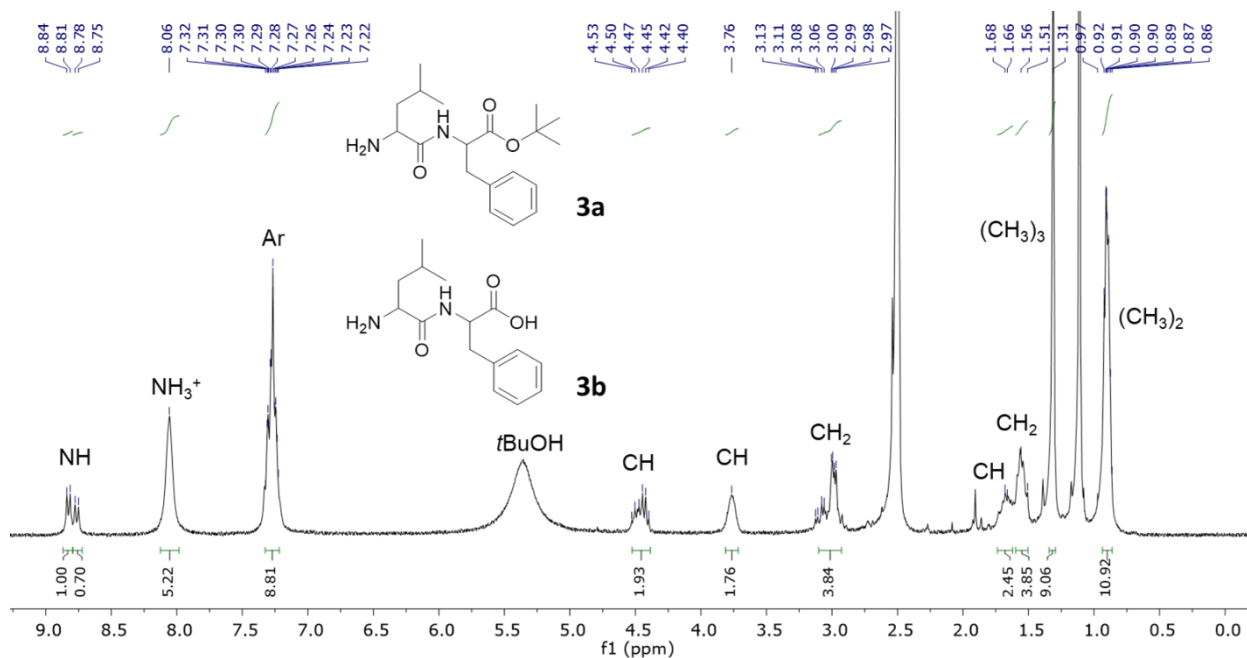

**Figure S37.** <sup>1</sup>H NMR (300 MHz, *d*<sub>6</sub>-DMSO) spectrum of xerogel **III**, 0.05M, 1.0 equivalent of H<sub>2</sub>SO<sub>4</sub>, day 1.

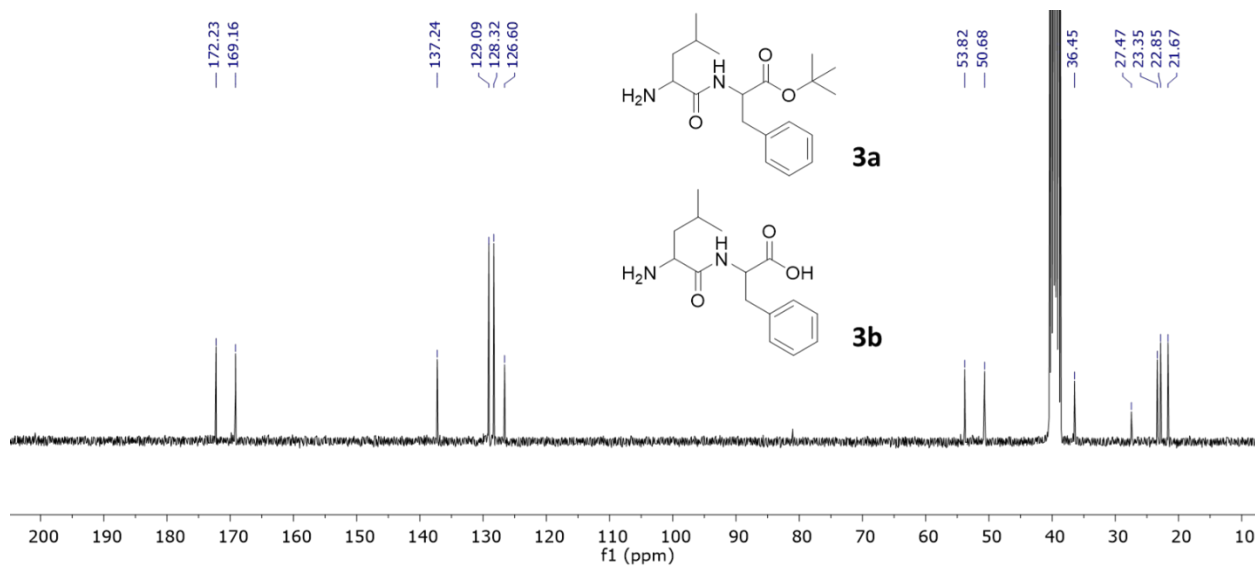

**Figure S38.** <sup>13</sup>C NMR (75 MHz, *d*<sub>6</sub>-DMSO) spectrum of xerogel **III**, 0.05M, 1.0 equivalent of H<sub>2</sub>SO<sub>4</sub>, day 1.

0.05 M, 0.5 eq H<sub>2</sub>SO<sub>4</sub>, day 1

**<sup>1</sup>H NMR** (300 MHz, *d*<sub>6</sub>-DMSO) δ 8.83 (d, *J* = 7.4 Hz, 1H), 8.06 (s, 3H), 7.98 (d, *J* = 7.7 Hz, 1H), 7.35 – 7.18 (m, 10H), 6.79 (d, *J* = 8.6 Hz, 1H), 4.44 (q, *J* = 7.4 Hz, 1H), 4.35 (q, *J* = 7.4 Hz, 1H), 4.02 – 3.92 (m, 1H), 3.76 (d, *J* = 6.0 Hz, 1H), 3.05 – 2.89 (m, 4H), 1.67 (dq, *J* = 12.7, 6.5, 6.1 Hz, 1H), 1.61 – 1.52 (m, 2H), 1.37 (s, 8H), 1.31 (s, 18H), 0.91 (dd, *J* = 6.3, 3.7 Hz, 6H), 0.84 (dd, *J* = 8.4, 6.5 Hz, 6H). Note: Presence of precursor marked by a star. **<sup>13</sup>C NMR** (126 MHz, *d*<sub>6</sub>-DMSO) δ 172.3, 169.2, 137.3, 129.1, 128.3, 128.1, 126.6, 126.5, 81.1, 80.7, 78.0, 53.8, 50.7, 36.5, 28.2, 27.5, 23.4, 22.9, 21.7.

**HR-MS:** *m/z* for C<sub>15</sub>H<sub>22</sub>N<sub>2</sub>O<sub>3</sub> [M + H]<sup>+</sup> calculated 279.1600, found 279.1629. *m/z* for C<sub>19</sub>H<sub>30</sub>N<sub>2</sub>O<sub>3</sub> [M + H]<sup>+</sup> calculated 335.2300, found 335.2242. *m/z* for C<sub>24</sub>H<sub>38</sub>N<sub>2</sub>O<sub>5</sub> [M + H]<sup>+</sup> calculated 435.2800, found 435.2864.

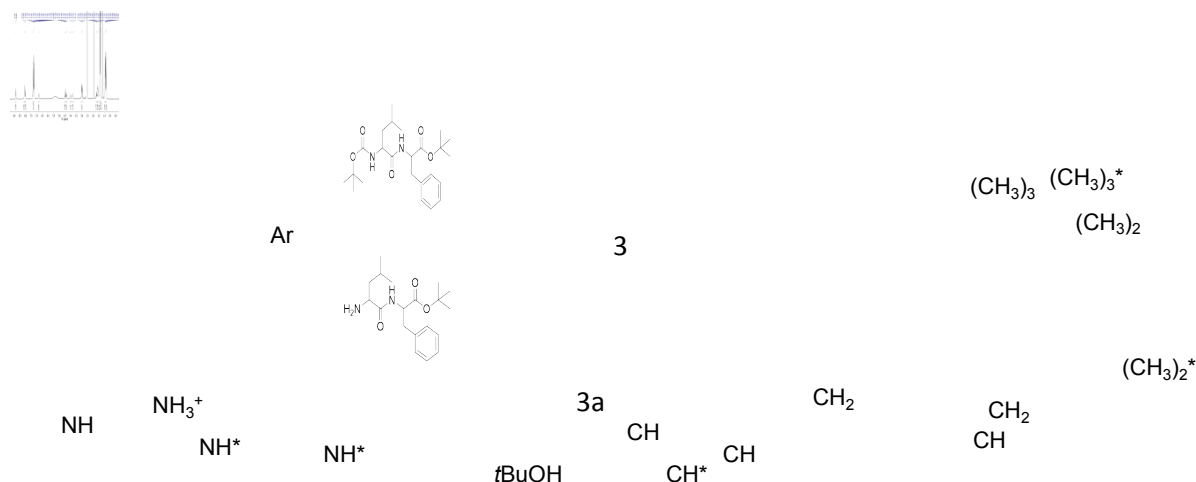

**Figure S39.** <sup>1</sup>H NMR (300 MHz, *d*<sub>6</sub>-DMSO) spectrum of xerogel **III**, 0.05M, 0.5 equivalent of H<sub>2</sub>SO<sub>4</sub>, day 1.

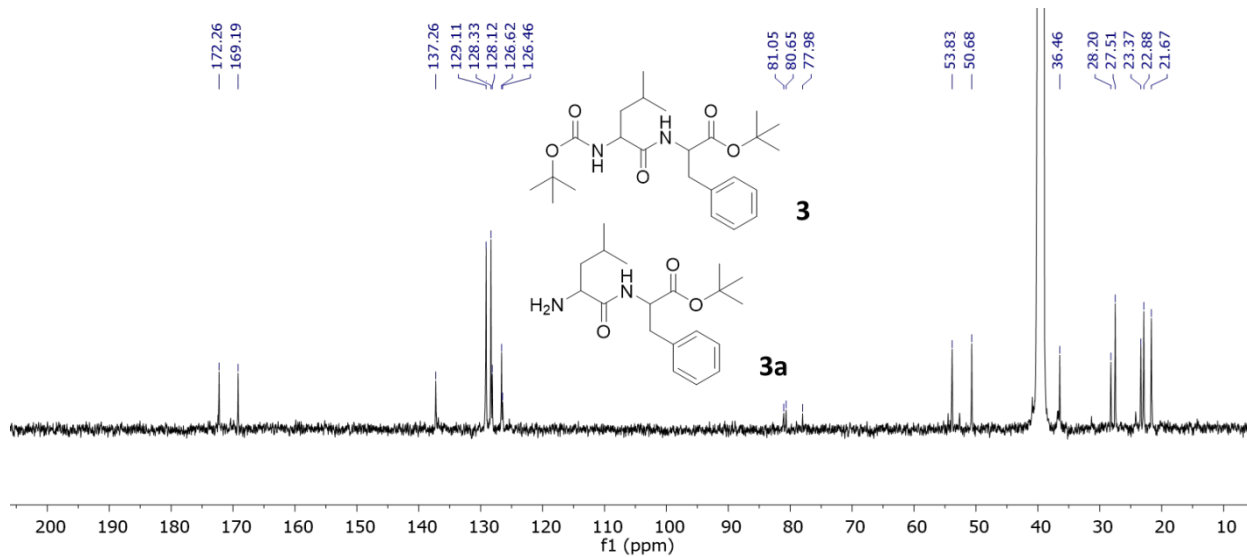

**Figure S40.**  $^{13}\text{C}$  NMR (126 MHz,  $d_6$ -DMSO) spectrum of xerogel **III**, 0.05M, 0.5 equivalent of  $\text{H}_2\text{SO}_4$ , day 1.

*0.05 M, 1.0 eq of  $\text{H}_2\text{SO}_4$ , day 10*

$^1\text{H}$  NMR (300 MHz,  $d_6$ -DMSO)  $\delta$  8.82 (d,  $J = 7.4$  Hz, 1H), 8.76 (d,  $J = 7.8$  Hz, 0.15H), 8.06 (s, 3.5H), 7.35 – 7.20 (m, 6H), 4.44 (q,  $J = 7.4$  Hz, 1.3H), 3.76 (s, 1.3H), 3.07 – 2.93 (m, 2.3H), 1.66 (dt,  $J = 12.5, 6.3$  Hz, 1.6H), 1.61 – 1.52 (m, 2.6H), 1.31 (s, 9H), 0.91 (dd,  $J = 6.3, 3.8$  Hz, 7.7H).

$^{13}\text{C}$  NMR (126 MHz,  $d_6$ -DMSO)  $\delta$  172.2, 169.8, 169.2, 169.1, 137.2, 136.8, 129.1, 129.1, 128.3, 128.3, 126.7, 126.6, 81.0, 54.5, 53.8, 50.6, 50.6, 36.7, 36.4, 29.7, 27.5, 23.4, 23.3, 22.8, 22.8, 21.7, 21.6.



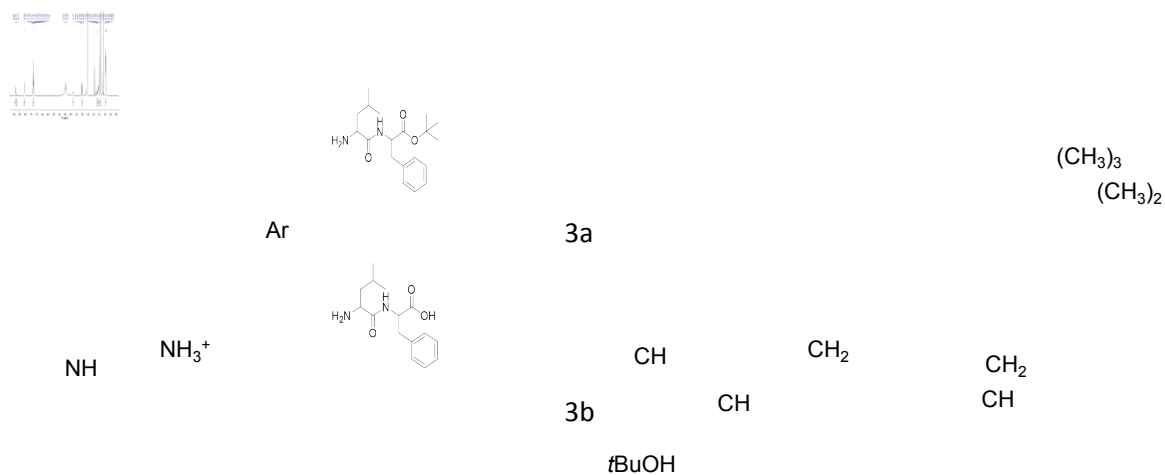

**Figure S41.**  $^1\text{H}$  NMR (300 MHz,  $d_6$ -DMSO) spectrum of xerogel **III**, 0.05M, 1.0 equivalent of  $\text{H}_2\text{SO}_4$ , day 10.

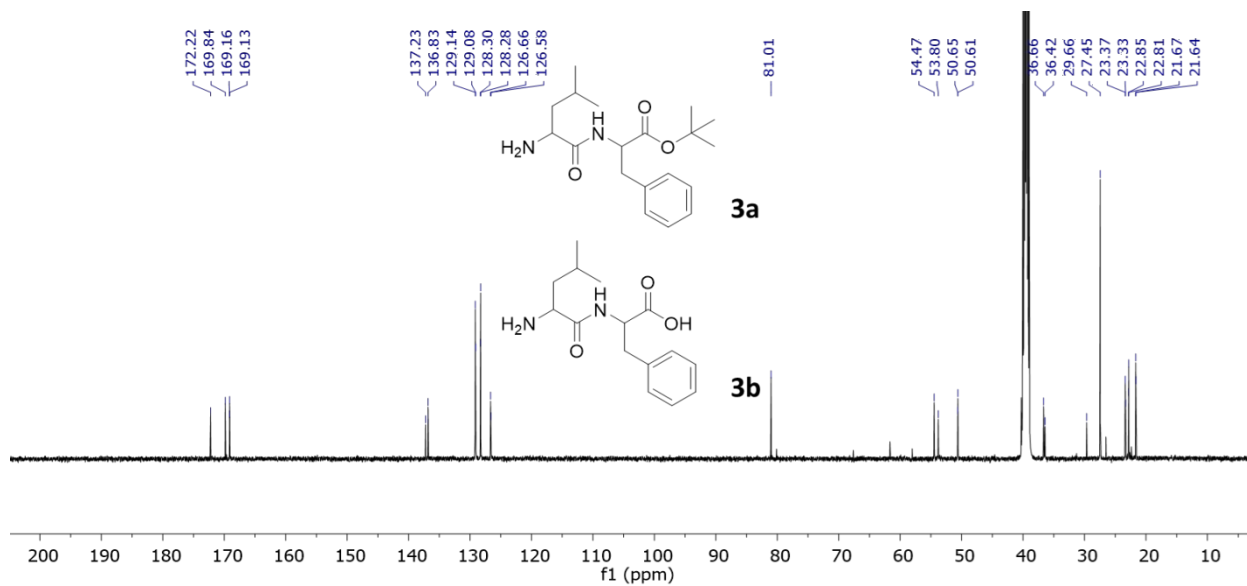

**Figure S42.**  $^{13}\text{C}$  NMR (126 MHz,  $d_6$ -DMSO) spectrum of xerogel **III**, 0.05M, 1.0 equivalent of  $\text{H}_2\text{SO}_4$ , day 10.

#### 2.2.4. Gel system IV: Precursor Boc-Phe-Phe-O $\beta$ Bu 1 + Boc-Leu-Phe-O $\beta$ Bu 3, 1:1 ratio

*0.05 M, 1.0 eq H<sub>2</sub>SO<sub>4</sub>, day 1*

**<sup>1</sup>H NMR** (300 MHz, *d*<sub>6</sub>-DMSO)  $\delta$  8.88 (d, *J*= 7.5 Hz, 0.6H), 8.82 (d, *J*= 7.5 Hz, 1H), 8.76 (d, *J*= 7.8 Hz, 0.3H), 8.06 (s, 5.6H), 7.36 – 7.21 (m, 15H), 4.48 (ddd, *J*= 19.1, 7.7, 5.3 Hz, 2.5H), 4.04 (s, 1H), 3.76 (s, 1H), 3.19 – 2.87 (m, 6H), 1.67 (q, *J*= 6.4 Hz, 1.2H), 1.60 – 1.49 (m, 2H), 1.32 (s, 4.6H), 1.32 (s, 5.3H), 0.96 – 0.86 (m, 7.2H). Note: this spectrum (system IV) is the superimpose of the individual gel spectra (systems I and III).

**<sup>13</sup>C NMR** (75 MHz, *d*<sub>6</sub>-DMSO)  $\delta$  172.7, 172.7, 169.6, 168.6, 137.7, 137.6, 135.1, 130.1, 129.7, 129.6, 129.6, 129.0, 128.8, 128.8, 127.7, 127.1, 127.1, 54.3, 53.6, 51.2, 37.4, 37.2, 36.9, 28.0, 23.8, 23.3, 22.2.

**HR-MS:** *m/z* for C<sub>15</sub>H<sub>22</sub>N<sub>2</sub>O<sub>3</sub> [M + H]<sup>+</sup> calculated 279.1600, found 279.1703. *m/z* for C<sub>18</sub>H<sub>20</sub>N<sub>2</sub>O<sub>3</sub> [M + H]<sup>+</sup> calculated 313.1500, found 313.1552. *m/z* for C<sub>19</sub>H<sub>30</sub>N<sub>2</sub>O<sub>3</sub> [M + H]<sup>+</sup> calculated 335.2300, found 335.2249. *m/z* for C<sub>22</sub>H<sub>28</sub>N<sub>2</sub>O<sub>3</sub> [M + H]<sup>+</sup> calculated 369.2100, found 369.2095.

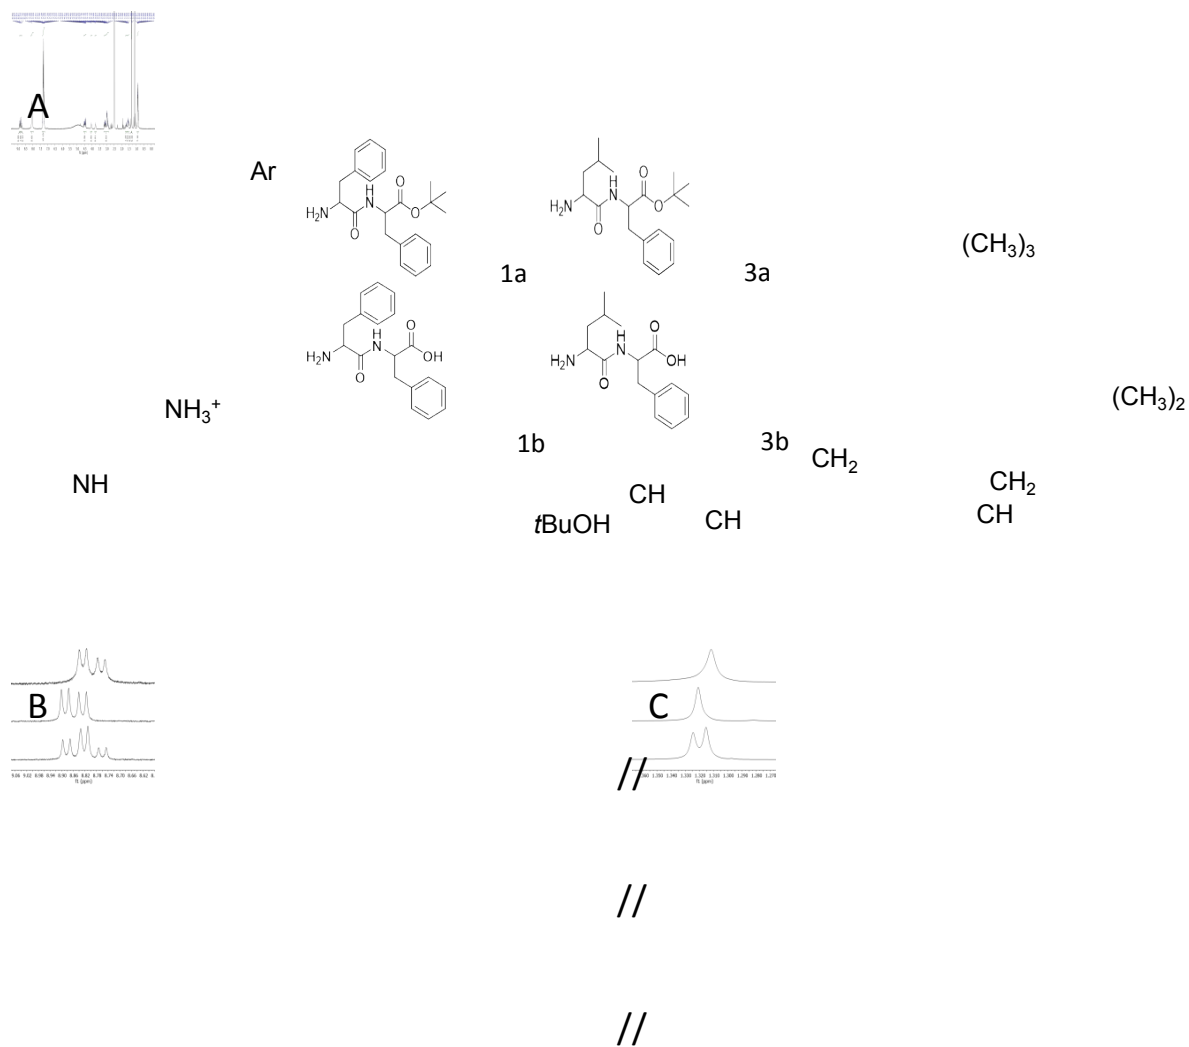

**Figure S43.**  $^1\text{H}$  NMR (300 MHz,  $d_6$ -DMSO) spectrum of (A) xerogel IV, 0.05M, 1.0 equivalent of  $\text{H}_2\text{SO}_4$ , day 1, (B) N-H region expansion showing system III (top), system I (middle) and system IV (bottom) and (C) *t*Bu protective group region expansion showing system III (top), system I (middle) and system IV (bottom).

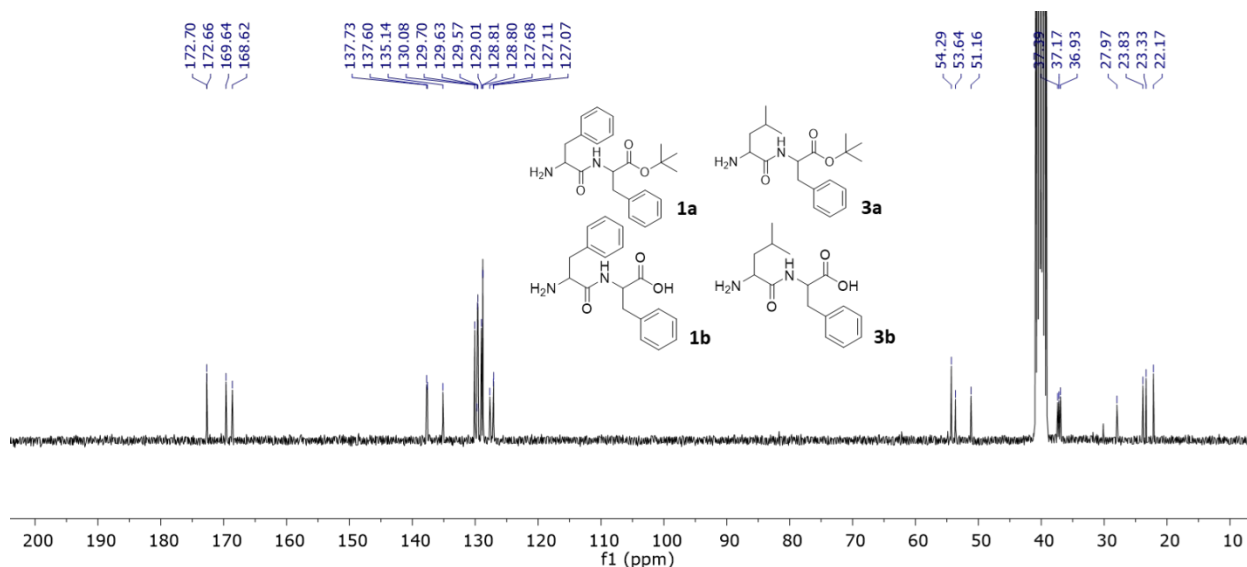

**Figure S44.**  $^{13}\text{C}$  NMR (75 MHz,  $d_6$ -DMSO) spectrum of xerogel IV, 0.05M, 1.0 equivalent of  $\text{H}_2\text{SO}_4$ , day 1.

*0.05 M, 0.5 eq  $\text{H}_2\text{SO}_4$ , day 1*

$^1\text{H}$  NMR (300 MHz,  $d_6$ -DMSO)  $\delta$  8.89 (d,  $J$  = 7.5 Hz, 1H), 8.83 (d,  $J$  = 7.4 Hz, 0.9H), 8.19 (d,  $J$  = 7.4 Hz, 1H), 8.07 (s, 6H), 7.98 (d,  $J$  = 7.6 Hz, 1H), 7.27 (ddt,  $J$  = 16.0, 13.3, 5.4 Hz, 30H), 6.81 (t,  $J$  = 9.3 Hz, 2H), 4.41 (ddd,  $J$  = 25.5, 11.2, 6.3 Hz, 3H), 4.19 (s, 1H), 4.06 (s, 1H), 4.01 – 3.92 (m, 1H), 3.77 (s, 1H), 3.21 – 2.87 (m, 10H), 1.69 (td,  $J$  = 13.3, 12.4, 5.5 Hz, 1H), 1.61 – 1.50 (m, 3H), 1.37 (s, 6H), 1.32 (s, 10H), 1.31 (s, 18H), 1.28 (s, 59H), 0.91 (dd,  $J$  = 6.3, 3.7 Hz, 6H), 0.84 (dd,  $J$  = 8.4, 6.5 Hz, 7H). Note: Presence of precursor marked by a star.

$^{13}\text{C}$  NMR (75 MHz,  $d_6$ -DMSO)  $\delta$  172.7, 172.7, 170.4, 170.3, 169.7, 168.6, 137.7, 137.6, 137.3, 137.2, 135.2, 135.1, 130.1, 129.7, 129.7, 129.6, 129.0, 128.8, 127.7, 127.2, 127.1, 127.07, 81.7, 81.5, 55.0, 54.9, 54.3, 53.7, 51.2, 37.5, 37.4, 37.2, 37.0, 27.98, 27.95, 23.9, 23.8, 23.3, 22.2.

**HR-MS:**  $m/z$  for  $\text{C}_{15}\text{H}_{22}\text{N}_2\text{O}_3$  calculated 279.1600, found 279.1621.  $m/z$  for  $\text{C}_{18}\text{H}_{20}\text{N}_2\text{O}_3$   $[\text{M} + \text{H}]^+$  calculated 313.1500, found 313.1472.  $m/z$  for  $\text{C}_{19}\text{H}_{30}\text{N}_2\text{O}_3$   $[\text{M} + \text{H}]^+$  calculated 335.2300, found 335.2245.  $m/z$  for  $\text{C}_{22}\text{H}_{28}\text{N}_2\text{O}_3$   $[\text{M} + \text{H}]^+$  calculated 369.2100, found 369.2090.  $m/z$  for

$C_{24}H_{38}N_2O_5$   $[M + H]^+$  calculated 435.2800, found 435.2768.  $m/z$  for  $C_{27}H_{36}N_2O_5$   $[M + H]^+$  calculated 469.2600, found 469.2603.

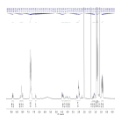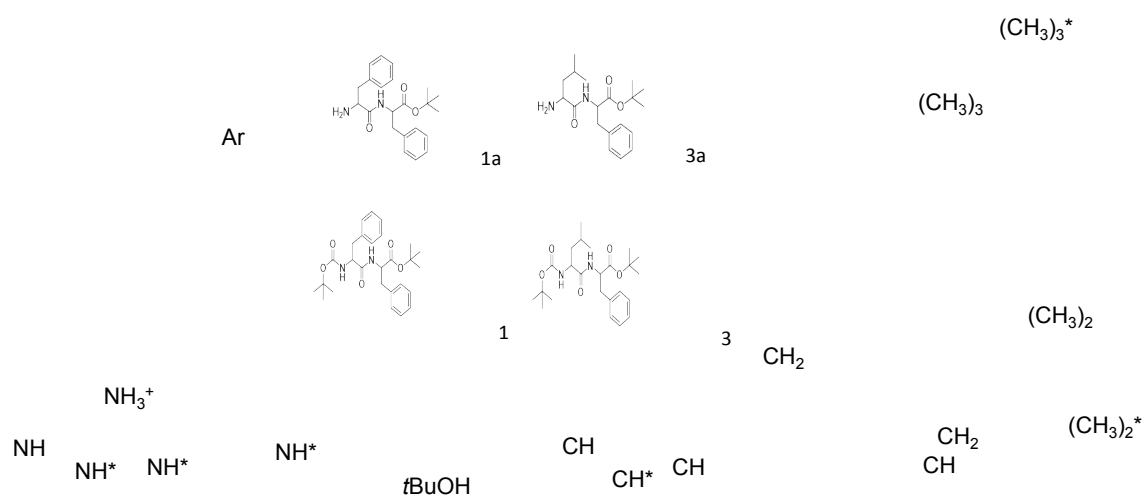

**Figure S45.**  $^1H$  NMR (300 MHz,  $d_6$ -DMSO) spectrum of xerogel IV, 0.05M, 0.5 equivalent of  $H_2SO_4$ , day 1.

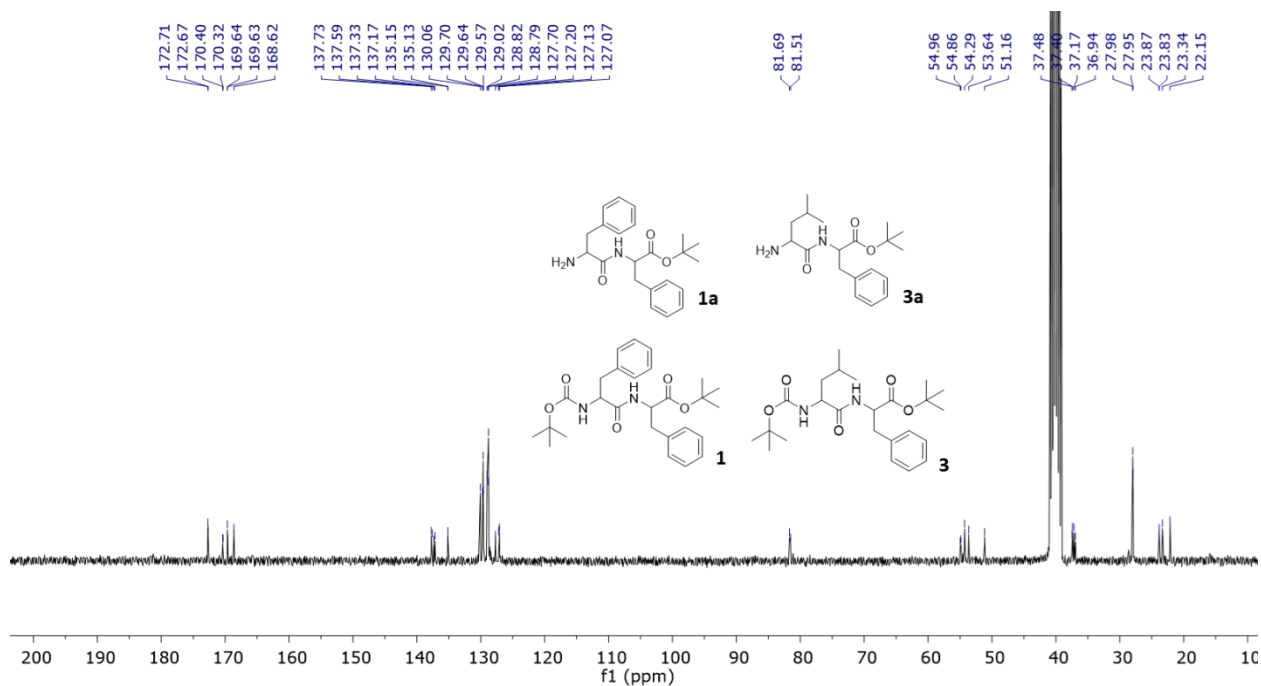

**Figure S46.**  $^{13}\text{C}$  NMR (75 MHz,  $d_6$ -DMSO) spectrum of xerogel IV, 0.05M, 0.5 equivalent of  $\text{H}_2\text{SO}_4$ , day 1.

*0.05 M, 1.0 eq  $\text{H}_2\text{SO}_4$ , day 5.*

$^1\text{H}$  NMR (300 MHz,  $d_6$ -DMSO)  $\delta$  8.90 (d,  $J = 7.5$  Hz, 0.8H), 8.83 (d,  $J = 7.4$  Hz, 1H), 8.77 (d,  $J = 7.8$  Hz, 0.2H), 8.07 (d,  $J = 5.5$  Hz, 6H), 7.36 – 7.20 (m, 16H), 4.53 – 4.38 (m, 2H), 4.06 (s, 1H), 3.77 (d,  $J = 7.7$  Hz, 1H), 3.16 – 2.89 (m, 6H), 1.75 – 1.61 (m, 1H), 1.56 (td,  $J = 6.8, 2.8$  Hz, 2H), 1.32 (s, 5H), 1.31 (s, 6H), 0.89 (dq,  $J = 8.4, 5.1, 4.5$  Hz, 7H).

$^{13}\text{C}$  NMR (126 MHz,  $d_6$ -DMSO)  $\delta$  172.3, 172.2, 169.2, 168.2, 137.3, 137.1, 134.7, 129.6, 129.2, 129.1, 128.6, 128.4, 128.3, 127.2, 126.7, 126.6, 61.7, 53.8, 53.8, 53.2, 50.7, 36.9, 36.7, 36.5, 29.7, 23.4, 22.9, 21.7.

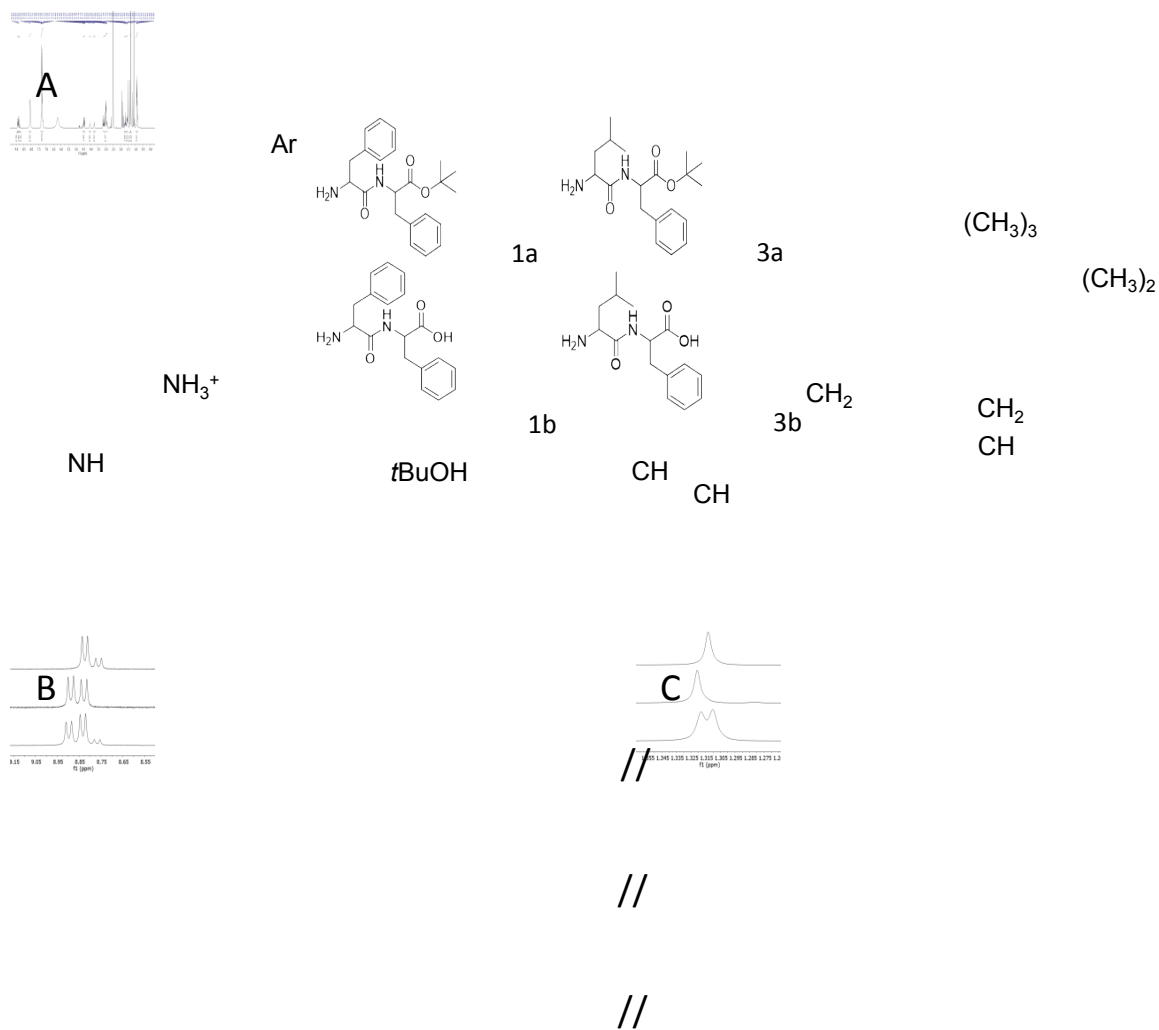

**Figure S47.**  $^1\text{H}$  NMR (300 MHz,  $d_6$ -DMSO) spectrum of (A) xerogel IV, 0.05M, 1.0 equivalent of  $\text{H}_2\text{SO}_4$ , day 5, (B) N-H region expansion showing system III (top), system I (middle) and system IV (bottom) and (C)  $t\text{Bu}$  protective group region expansion showing system III (top), system I (middle) and system IV (bottom).

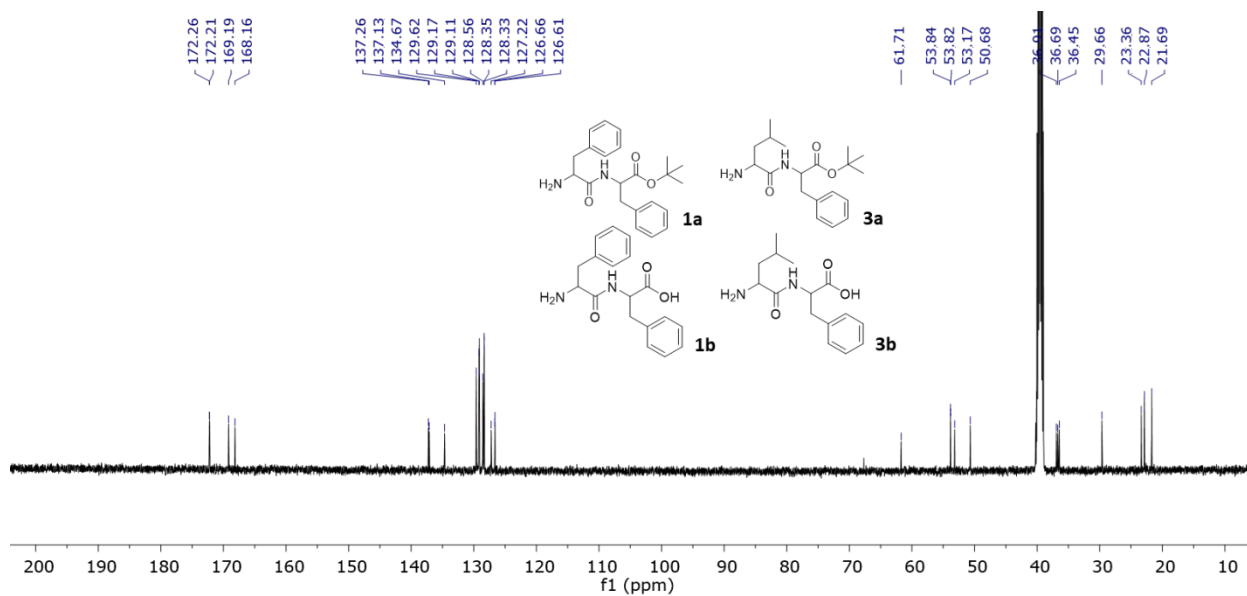

**Figure S48.**  $^{13}\text{C}$  NMR (126 MHz,  $d_6$ -DMSO) spectrum of xerogel IV, 0.05M, 1.0 equivalent of  $\text{H}_2\text{SO}_4$ , day 5.



### 2.2.5. Gelation attempt in DCM

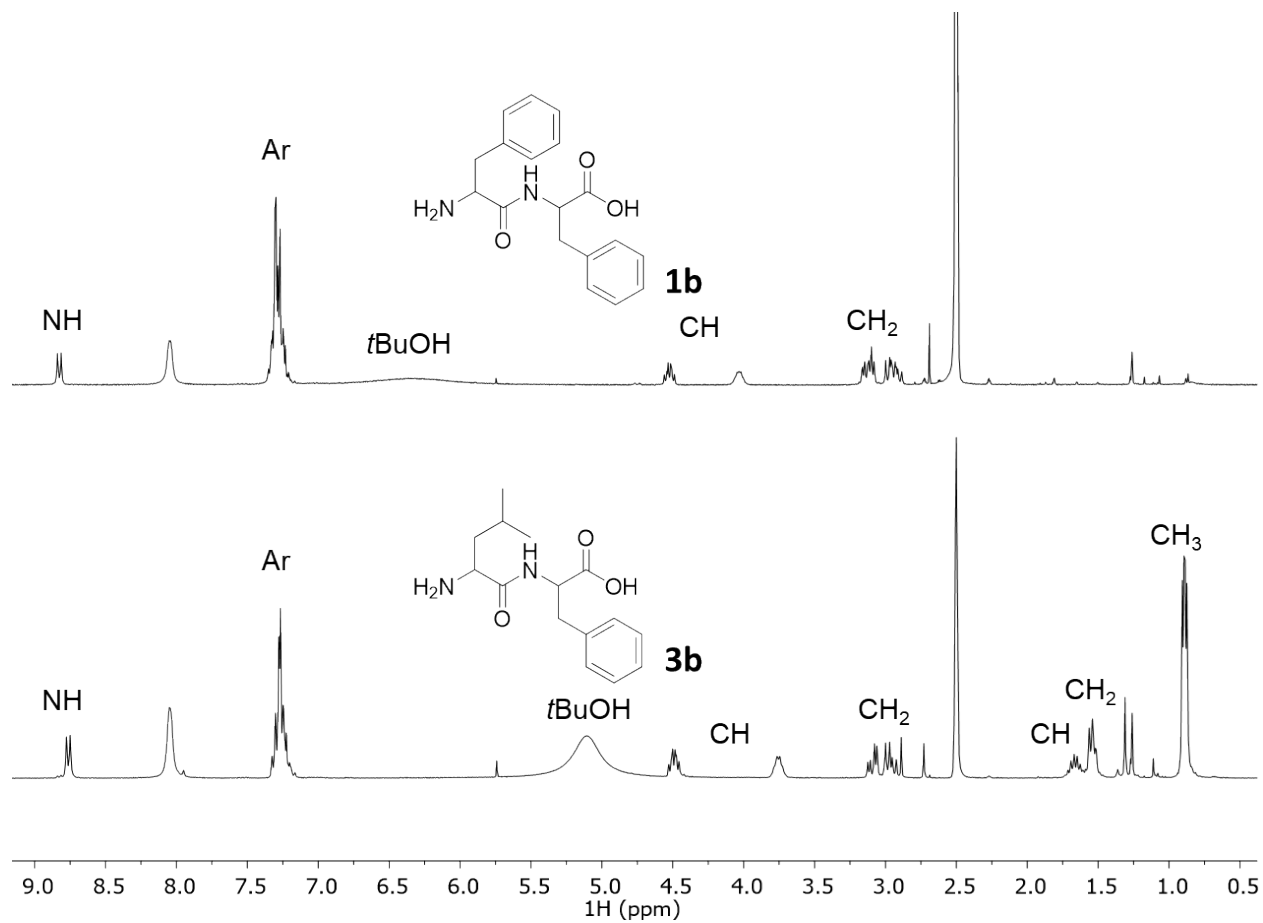

Figure S49.  $^1\text{H}$  NMR (300 MHz,  $d_6$ -DMSO) spectrum of precipitates in DCM.

### 2.3. Solvatochromism and concentration study by UV-vis

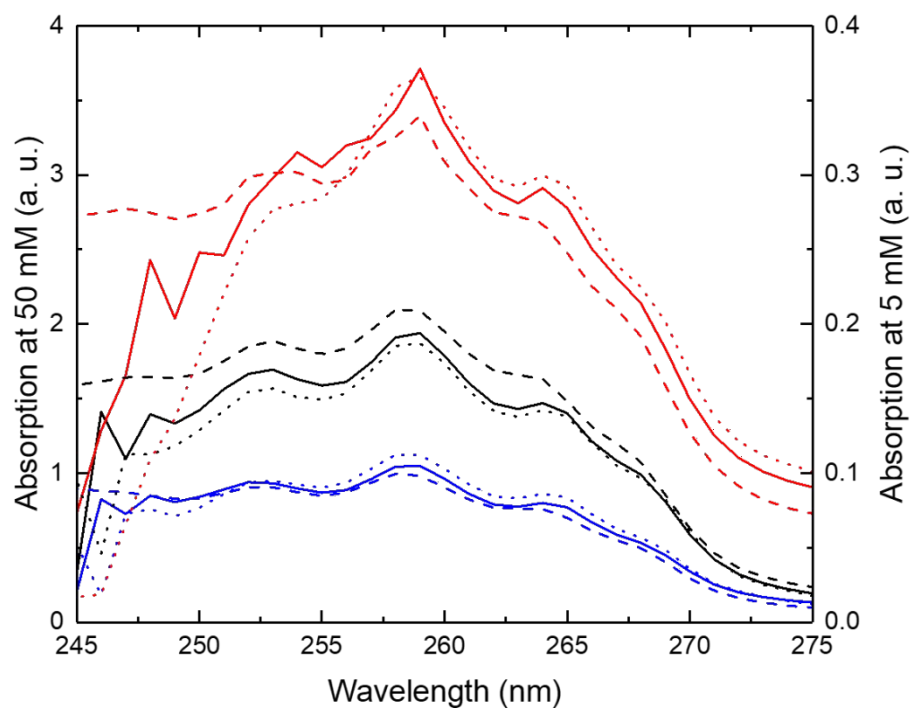

**Figure S50.** UV spectra of precursor gelators 1 (black), 2 (red) and 3 (blue) at 5 mM (plane) and 50 mM (dash) in *t*BuOAc and 50 mM in ACN (dots).

#### 2.4. Phase-transition temperature

Phase-transition temperatures were measured by gradually heating the gel specimens starting from 25 °C, by 5 °C increments at 10 min intervals. The self-supporting character of the gels was assessed by the vial inversion method.

*Table S1. Phase transition temperature (°C) of gel systems I, II, III and IV depending on the gel concentration.*

| T <sub>gel-sol</sub> ( °C) | Gel concentration |
|----------------------------|-------------------|
|----------------------------|-------------------|

|                | 0.025 M | 0.05 M | 0.1 M |
|----------------|---------|--------|-------|
| Gel system I   | 45      | 50     | 55    |
| Gel system II  | 55      | 65     | 65    |
| Gel system III | 40      | 45     | 50    |
| Gel system IV  | 35      | 40     | 45    |

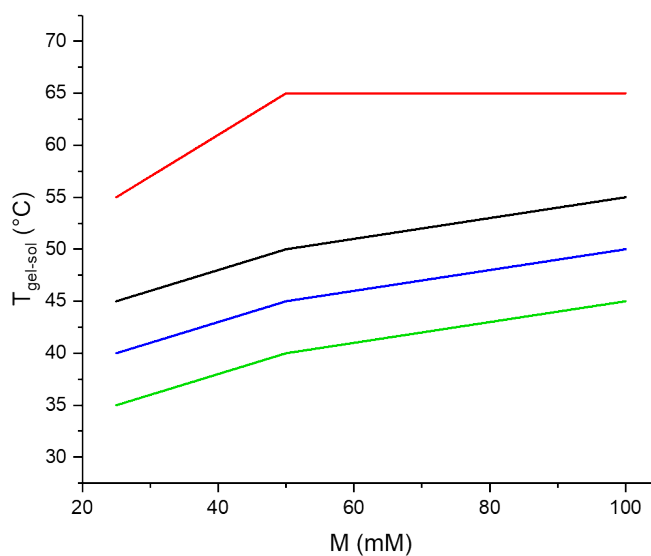

**Figure S51.** Phase transition temperature in function of gel concentration for gel system **I** (black), **II** (red), **III** (blue) and **IV** (green).

## 2.5. Gelation concentration screening

**Table S2.** Concentration screening trials of gel system **I** in *t*BuOAc solvent (1.0 mL) at R.T.

| M | Boc-Phe-Phe-O <i>t</i> Bu<br>1 (mg) | H <sub>2</sub> SO <sub>4</sub> | H <sub>2</sub> SO <sub>4</sub> | Gelation outcome | Lifespan |
|---|-------------------------------------|--------------------------------|--------------------------------|------------------|----------|
|   |                                     |                                |                                |                  |          |

| (mol/L) |      | (eq) | ( $\mu$ L) |                             | (day)               |
|---------|------|------|------------|-----------------------------|---------------------|
| 0.1     | 47   | 1.5  | 7.8        | SSG <sup>[a]</sup> , opaque | 3                   |
| 0.1     | 47   | 1.0  | 5.3        | SSG, opaque                 | 15-17               |
| 0.1     | 47   | 0.5  | 2.7        | SSG, opaque                 | / <sup>[b]</sup>    |
| 0.05    | 23.5 | 1.5  | 4          | SSG, opaque                 | 3-4                 |
| 0.05    | 23.5 | 1.0  | 2.7        | SSG, opaque                 | 4-6                 |
| 0.05    | 23.5 | 0.5  | 1.3        | SSG, opaque                 | /                   |
| 0.025   | 11.8 | 1.5  | 2          | SSG, opaque                 | n.m. <sup>[c]</sup> |
| 0.025   | 11.8 | 1.0  | 1.3        | SSG, opaque                 | n.m.                |
| 0.025   | 11.8 | 0.5  | 0.6        | SSG, opaque                 | n.m.                |

[a] self-supporting gel [b] no transitivity [c] not measured

**Table S3.** Concentration screening trials of gel system **II** in *t*BuOAc solvent (1.0 mL) at R. T.

| M<br>(mol/L) | Boc-Phe-Phe-Phe-<br>O <i>t</i> Bu <b>2</b> (mg) | H <sub>2</sub> SO <sub>4</sub><br>(eq) | H <sub>2</sub> SO <sub>4</sub><br>( $\mu$ L) | Gelation outcome            | Lifespan<br>(day) |
|--------------|-------------------------------------------------|----------------------------------------|----------------------------------------------|-----------------------------|-------------------|
| 0.1          | 61.5                                            | 1.0                                    | 5.3                                          | SSG <sup>[a]</sup> , opaque | 15                |
| 0.1          | 61.5                                            | 0.5                                    | 2.7                                          | SSG, opaque                 | / <sup>[b]</sup>  |
| 0.05         | 30.8                                            | 1.5                                    | 4.0                                          | SSG, opaque                 | 5-7               |
| 0.05         | 30.8                                            | 1.0                                    | 2.7                                          | SSG, opaque                 | 7-11              |
| 0.05         | 30.8                                            | 0.5                                    | 1.3                                          | SSG, opaque                 | /                 |
| 0.025        | 15.4                                            | 1.0                                    | 1.3                                          | SSG, opaque                 | 11                |

|       |      |     |     |             |   |
|-------|------|-----|-----|-------------|---|
| 0.025 | 15.4 | 0.5 | 0.6 | SSG, opaque | / |
|-------|------|-----|-----|-------------|---|

[a] self-supporting gel [b] no transitivity

**Table S4.** Concentration screening trials of gel system **III** in *t*BuOAc solvent (1.0 mL) at R.T.

| M<br>(mol/L) | Boc-Leu-Phe-O <i>t</i> Bu<br>3 (mg) | H <sub>2</sub> SO <sub>4</sub><br>(eq) | H <sub>2</sub> SO <sub>4</sub><br>(μL) | Gelation outcome                 | Lifespan<br>(day) |
|--------------|-------------------------------------|----------------------------------------|----------------------------------------|----------------------------------|-------------------|
| 0.1          | 43.4                                | 1.5                                    | 7.8                                    | SSG <sup>[a]</sup> , transparent | 4-5               |
| 0.1          | 43.4                                | 1.0                                    | 5.3                                    | SSG, transparent                 | 25                |
| 0.1          | 43.4                                | 0.5                                    | 2.7                                    | SSG, transparent                 | / <sup>[b]</sup>  |
| 0.05         | 21.7                                | 1.5                                    | 4.0                                    | SSG, transparent                 | 1-2               |
| 0.05         | 21.7                                | 1.0                                    | 2.7                                    | SSG, transparent                 | 22                |
| 0.05         | 21.7                                | 0.5                                    | 1.3                                    | SSG, transparent                 | /                 |
| 0.025        | 10.8                                | 1.5                                    | 2.0                                    | SSG, transparent                 | 18-20             |
| 0.025        | 10.8                                | 1.0                                    | 1.3                                    | SSG, transparent                 | 28-34             |
| 0.025        | 10.8                                | 0.5                                    | 0.6                                    | SSG, transparent                 | /                 |

[a] self-supporting gel [b] no transitivity

**Table S5.** Concentration screening trials of gel system **IV** in *t*BuOAc solvent (1.0 mL) at R.T.

| M<br>(mol/L) | Boc-Phe-Phe-<br>O <i>t</i> Bu 1 (mg) | Boc-Leu-Phe-<br>O <i>t</i> Bu 3 (mg) | H <sub>2</sub> SO <sub>4</sub><br>(eq) | H <sub>2</sub> SO <sub>4</sub><br>(μL) | Gelation outcome                 | Lifespan<br>(day) |
|--------------|--------------------------------------|--------------------------------------|----------------------------------------|----------------------------------------|----------------------------------|-------------------|
| 0.1          | 23.5                                 | 21.7                                 | 1.5                                    | 7.8                                    | SSG <sup>[a]</sup> , transparent | 1-2               |

|       |      |      |     |     |                  |         |
|-------|------|------|-----|-----|------------------|---------|
| 0.1   | 23.5 | 21.7 | 1.0 | 5.3 | SSG, transparent | 10      |
| 0.1   | 23.5 | 21.7 | 0.5 | 2.7 | SSG, transparent | /[b]    |
| 0.05  | 11.8 | 10.8 | 1.5 | 4.0 | SSG, transparent | 1-2     |
| 0.05  | 11.8 | 10.8 | 1.0 | 2.7 | SSG, transparent | 7-9     |
| 0.05  | 11.8 | 10.8 | 0.5 | 1.3 | SSG, transparent | /       |
| 0.025 | 5.8  | 5.4  | 1.5 | 2.0 | solution         | n.m.[c] |
| 0.025 | 5.8  | 5.4  | 1.0 | 1.3 | SSG, transparent | 5       |
| 0.025 | 5.8  | 5.4  | 0.5 | 0.6 | SSG, transparent | /       |

[a] self-supporting gel [b] no transitivity [c] not measured

### 3. FTIR spectra of compounds 1-8, 1a-3a and xerogels I-IV

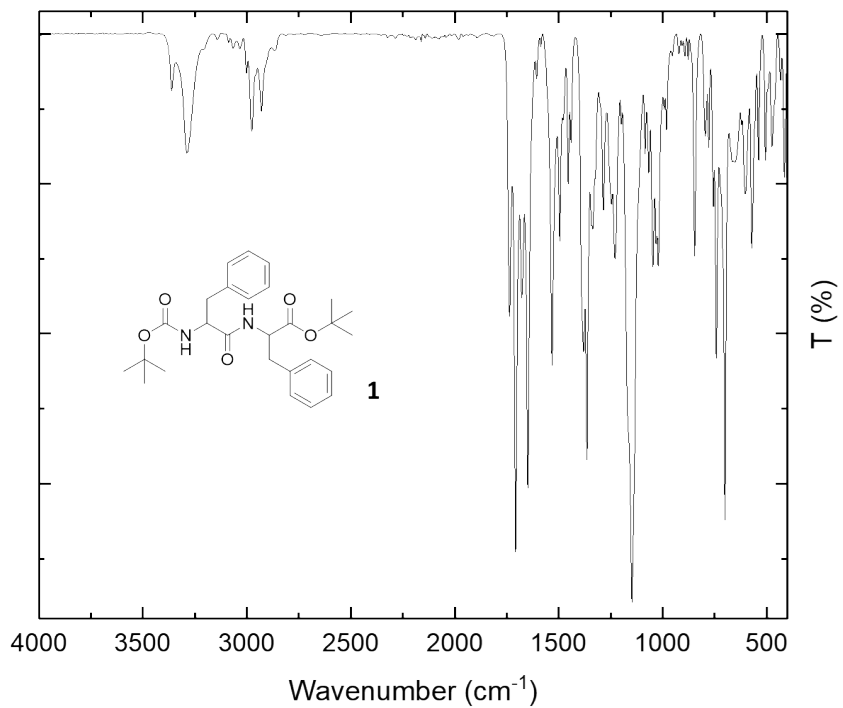

Figure S52. ATR-FTIR spectrum of Boc-Phe-Phe-OtBu 1.

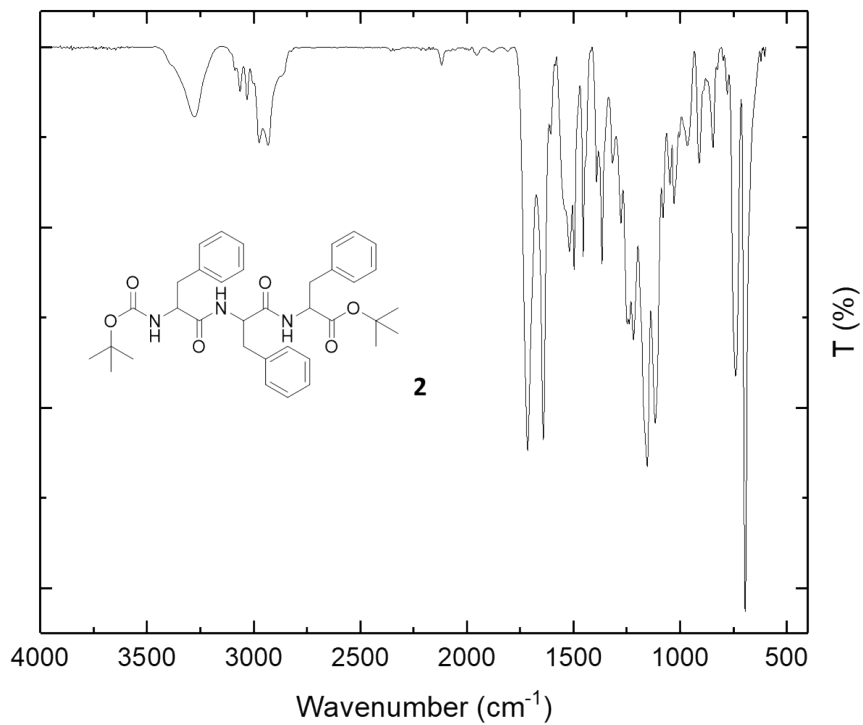



Figure S53. ATR-FTIR spectrum of Boc-Phe-Phe-Phe-O*t*Bu **2**.

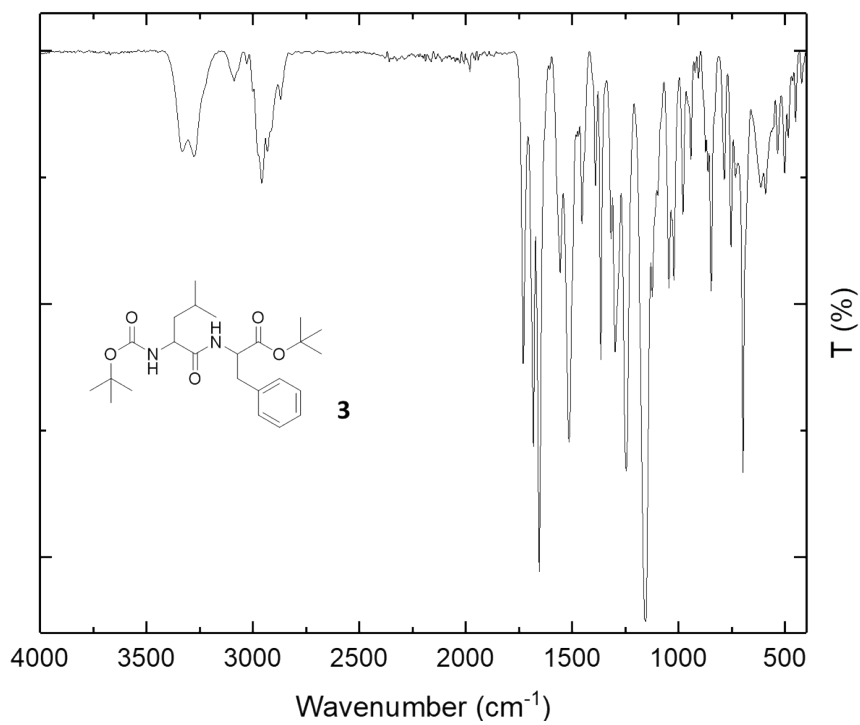

Figure S54. ATR-FTIR spectrum of Boc-Leu-Phe-O*t*Bu **3**.

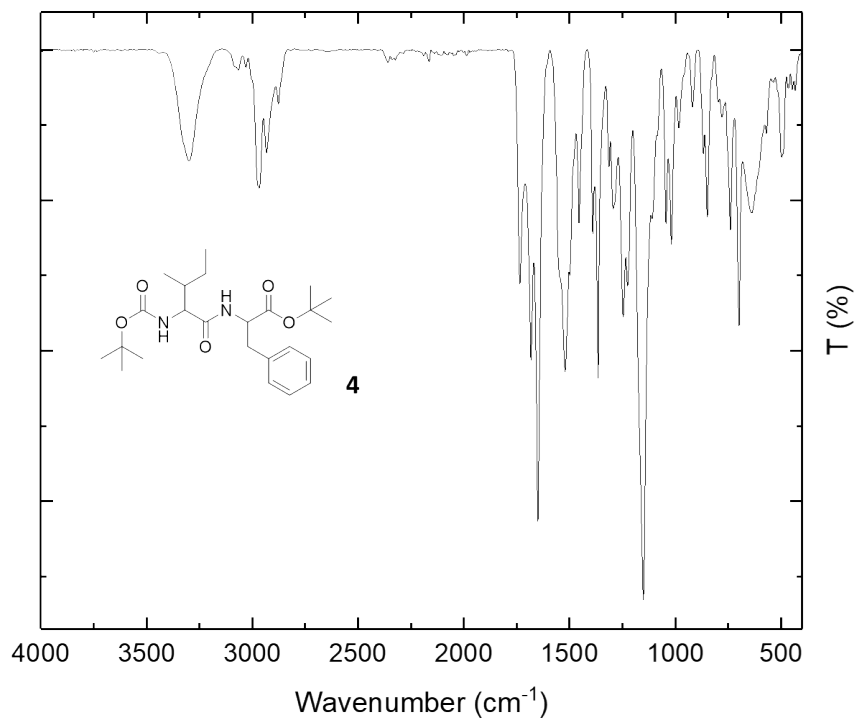

Figure S55. ATR-FTIR spectrum of Boc-Ile-Phe-O*t*Bu **4**.

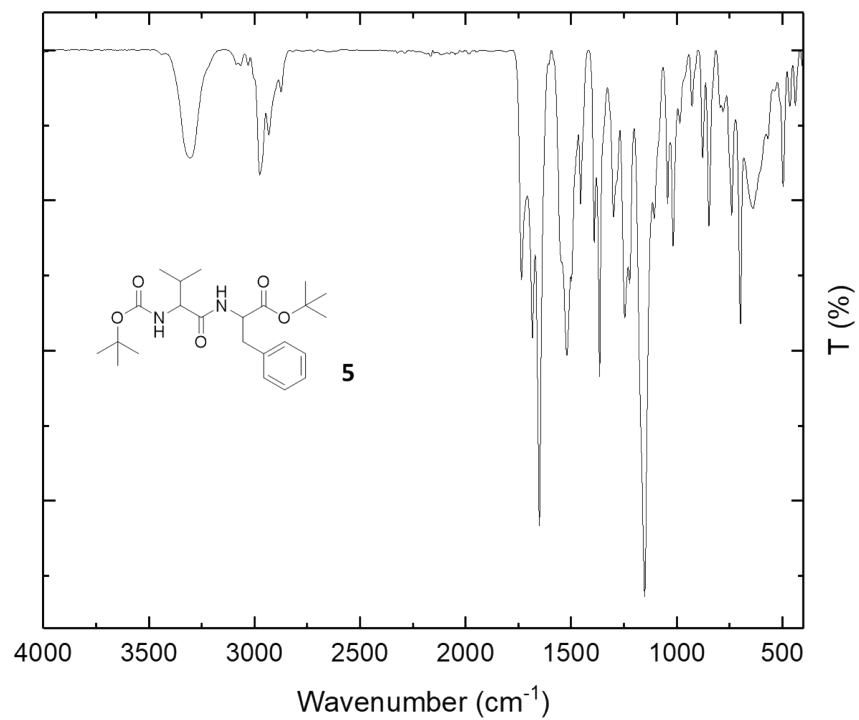

Figure S56. ATR-FTIR spectrum of Boc-Val-Phe-O*t*Bu **5**.

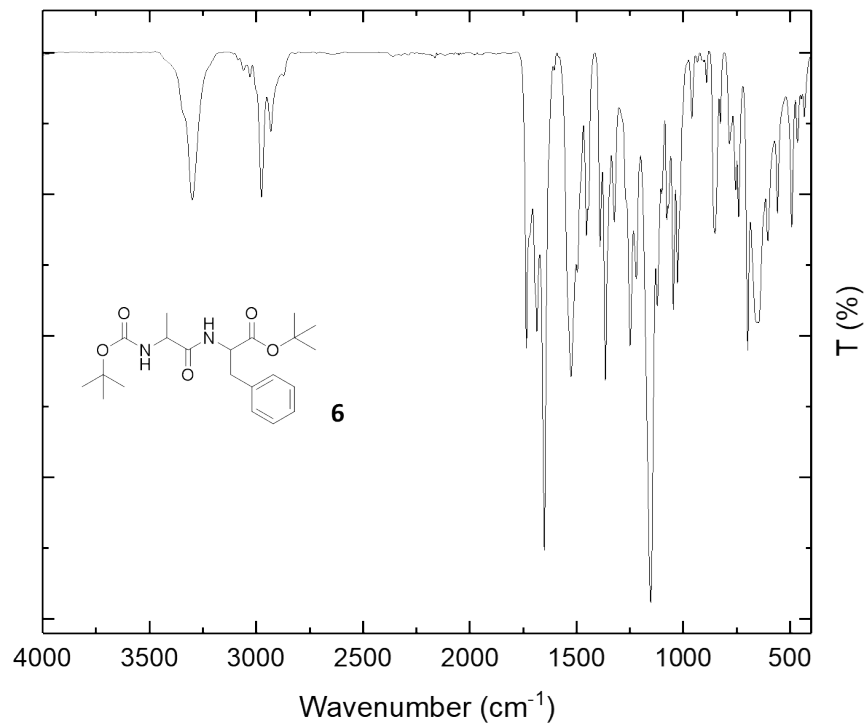

Figure S57. ATR-FTIR spectrum of Boc-Ala-Phe-O*t*Bu **6**.

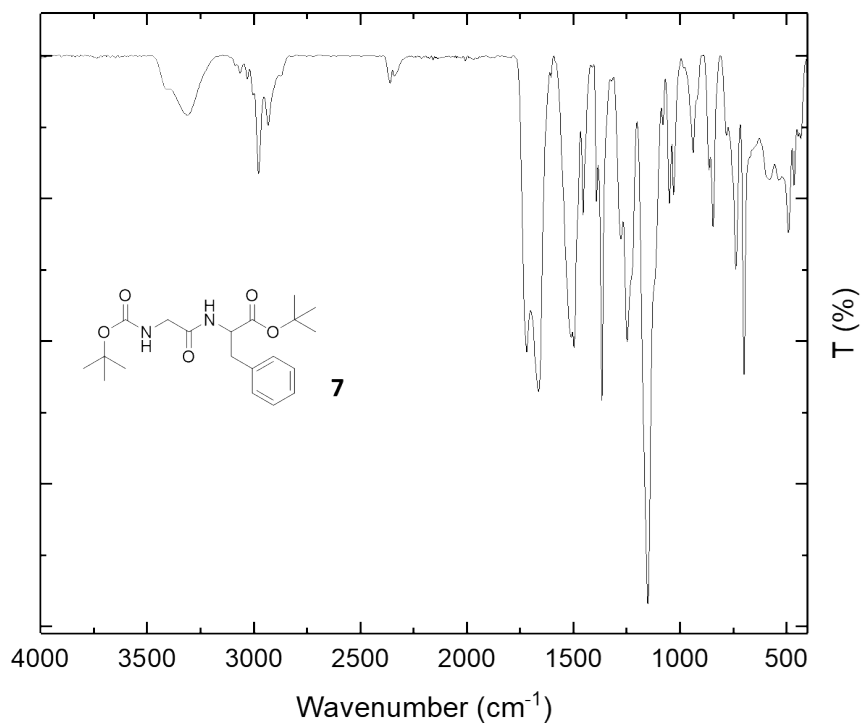

Figure S58. ATR-FTIR spectrum of Boc-Gly-Phe-O*t*Bu **7**.

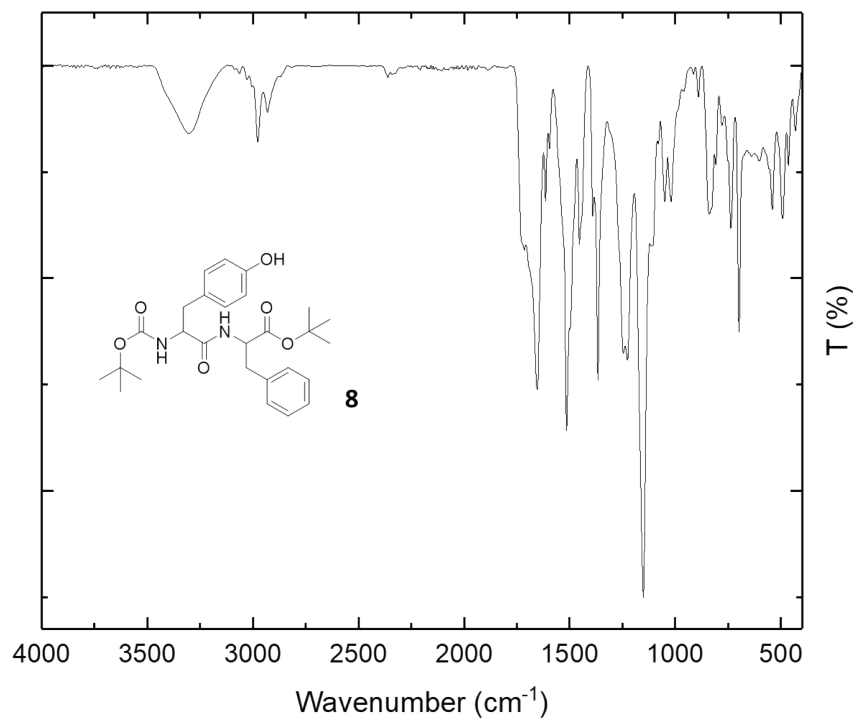

Figure S59. ATR-FTIR spectrum of Boc-Tyr-Phe-O*t*Bu **8**.

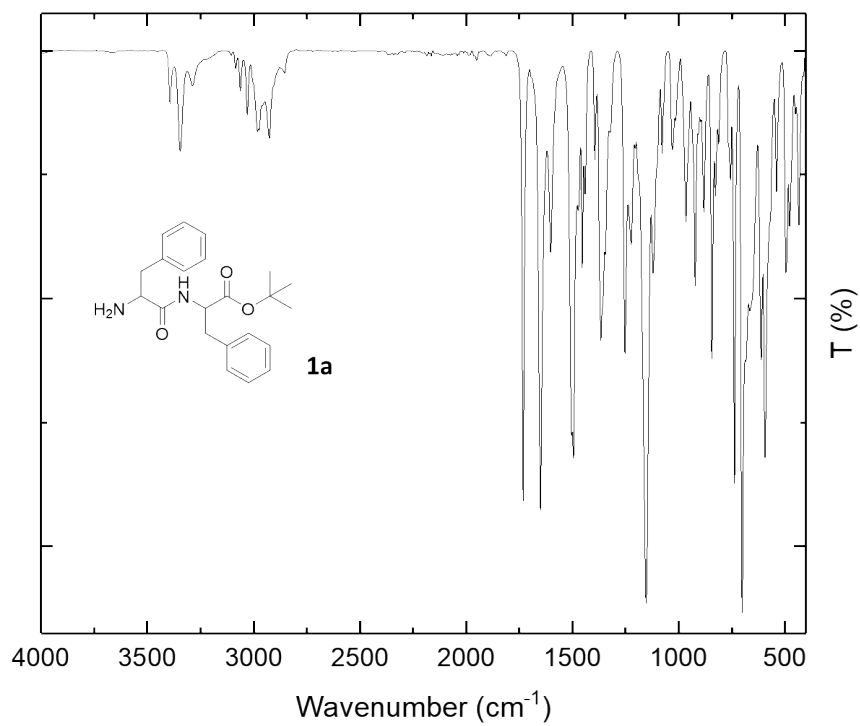

Figure S60. ATR-FTIR spectrum of Phe-Phe-O*t*Bu **1a**.

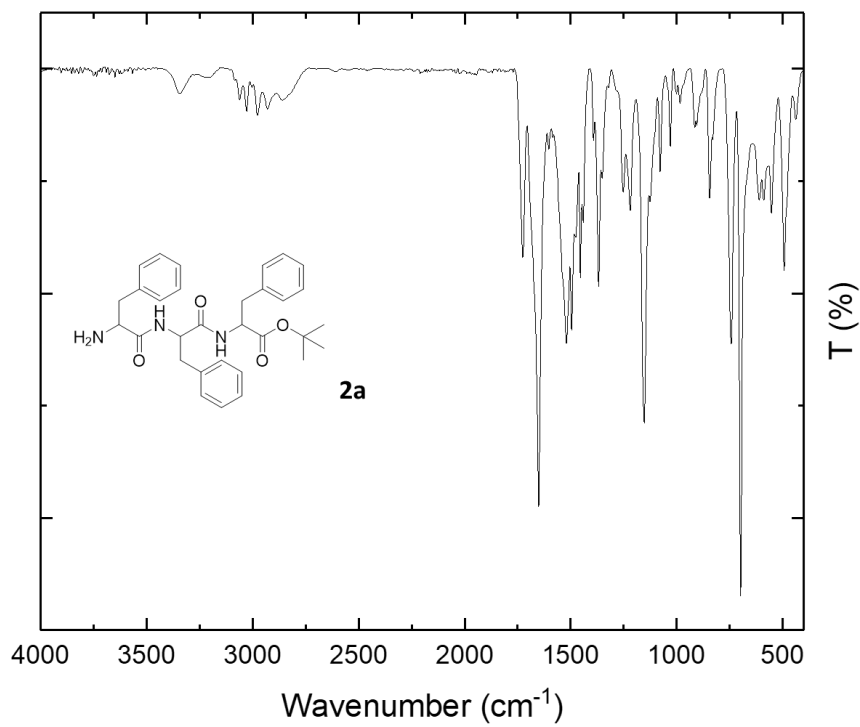

Figure S61. ATR-FTIR spectrum of Phe-Phe-Phe-O*t*Bu **2a**.

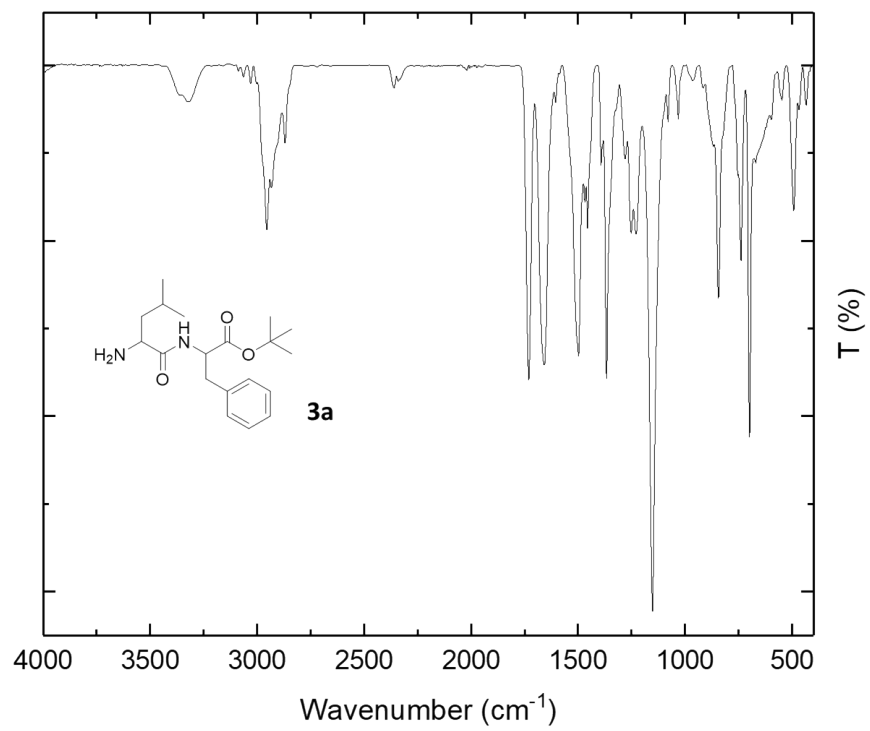

**Figure S62.** ATR-FTIR spectrum of Leu-Phe-OtBu **3a**.

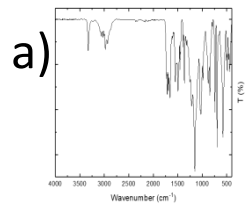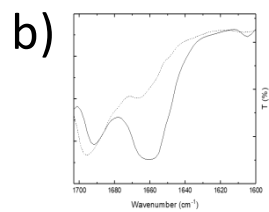

**Figure S63.** a) ATR-FTIR spectrum of xerogel I and b) ATR-FTIR spectrum magnified in the amide I region of xerogel I (solid line) and non-dried “wet” gel I (dashed line).

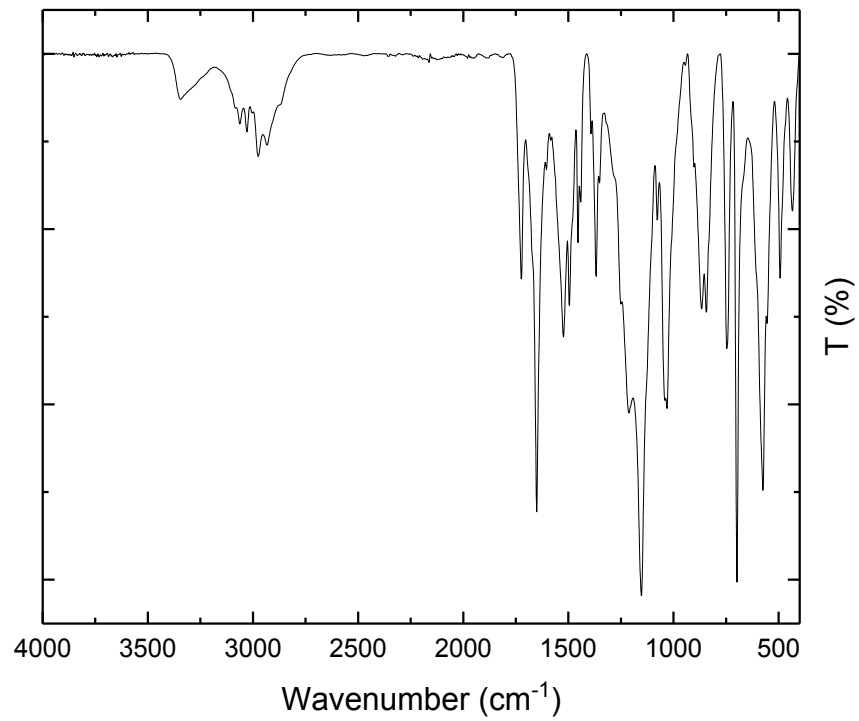

**Figure S64.** ATR-FTIR spectrum of xerogel II.

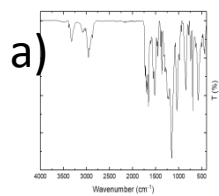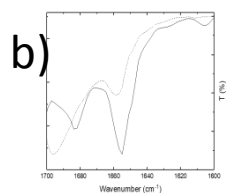

**Figure S65.** a) ATR-FTIR spectrum of xerogel **III** and b) ATR-FTIR spectrum magnified in the amide I region of xerogel **III** (solid line) and non-dried “wet” gel **III** (dashed line).



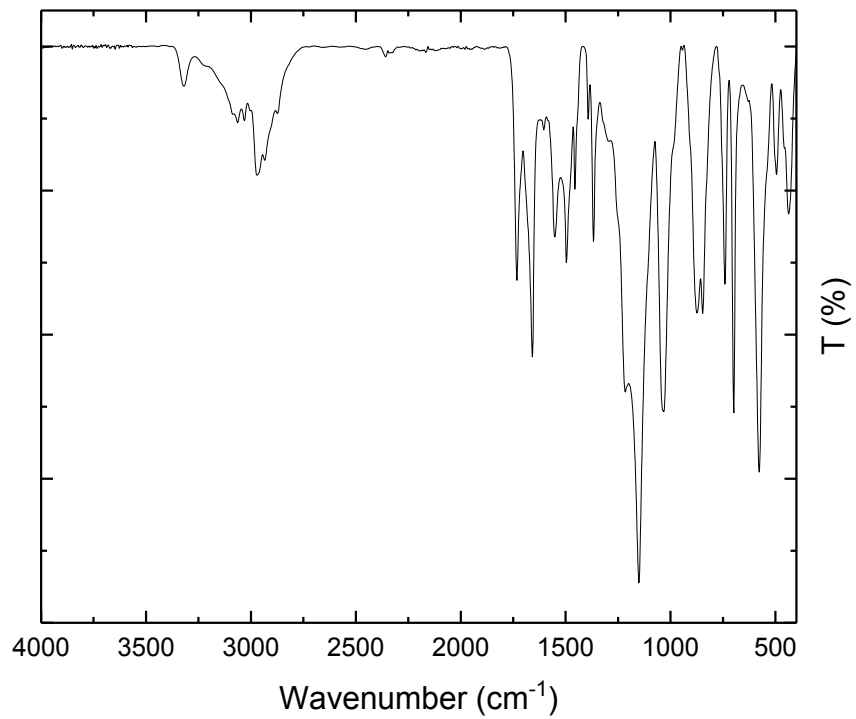

**Figure S66.** ATR-FTIR spectrum of xerogel **IV**.

#### 4. UV-vis spectra of compounds 1-1a, 2-2a and 3-3a

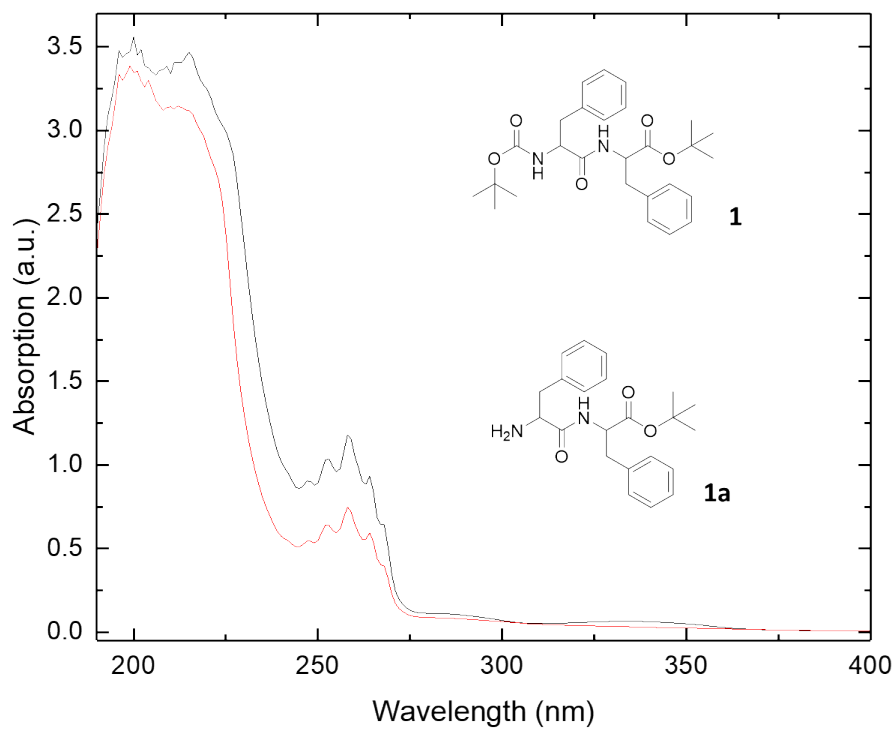

**Figure S67.** UV-vis spectra of Boc-Phe-Phe-OtBu **1** (black) and Phe-Phe-OtBu **1a** (red) at 25 mM in ACN.

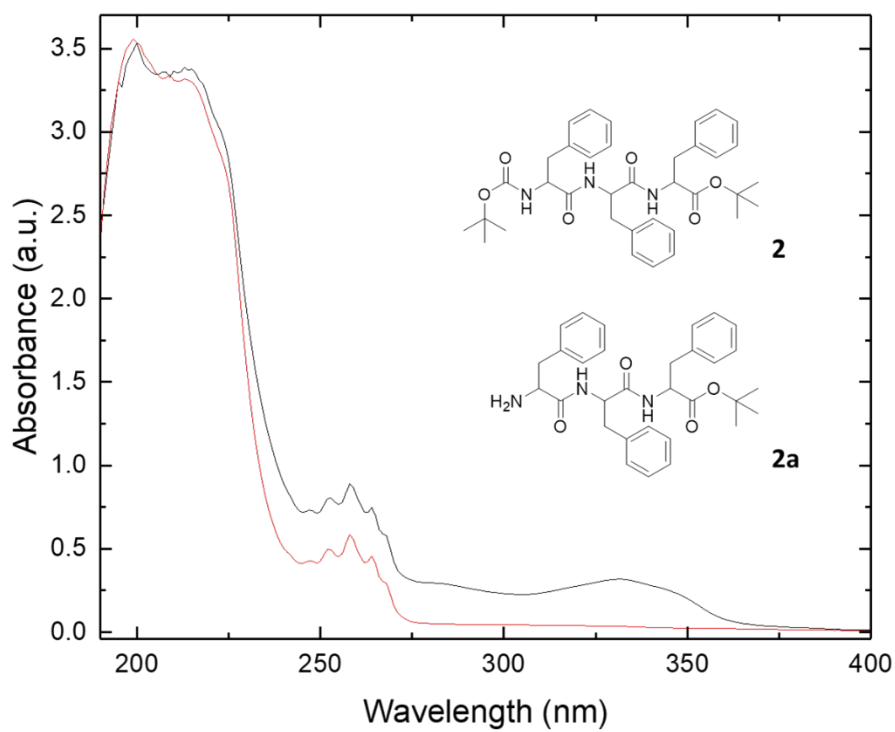

**Figure S68.** UV-vis spectra of Boc-Phe-Phe-Phe-OtBu **2** (black) and Phe-Phe-Phe-OtBu **2a** (red) at 1 mM in ACN.

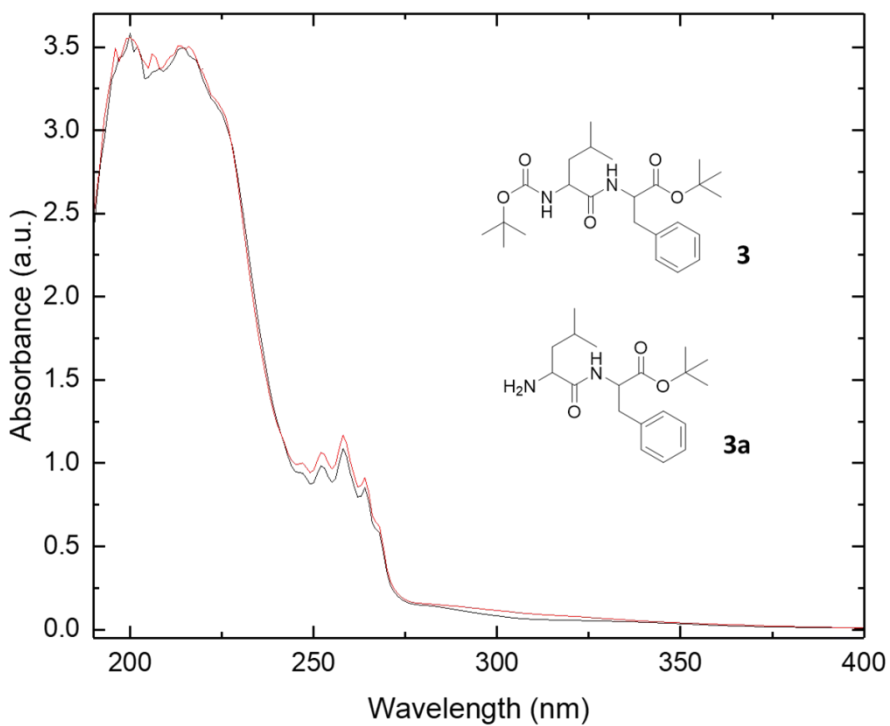

**Figure S69.** UV-vis spectra of Boc-Leu-Phe-O*t*Bu **3** (black) and Leu-Phe-O*t*Bu **3a** (red) at 5 mM in ACN.

## 5. Rheology measurement plots of gel systems I, II, III and IV

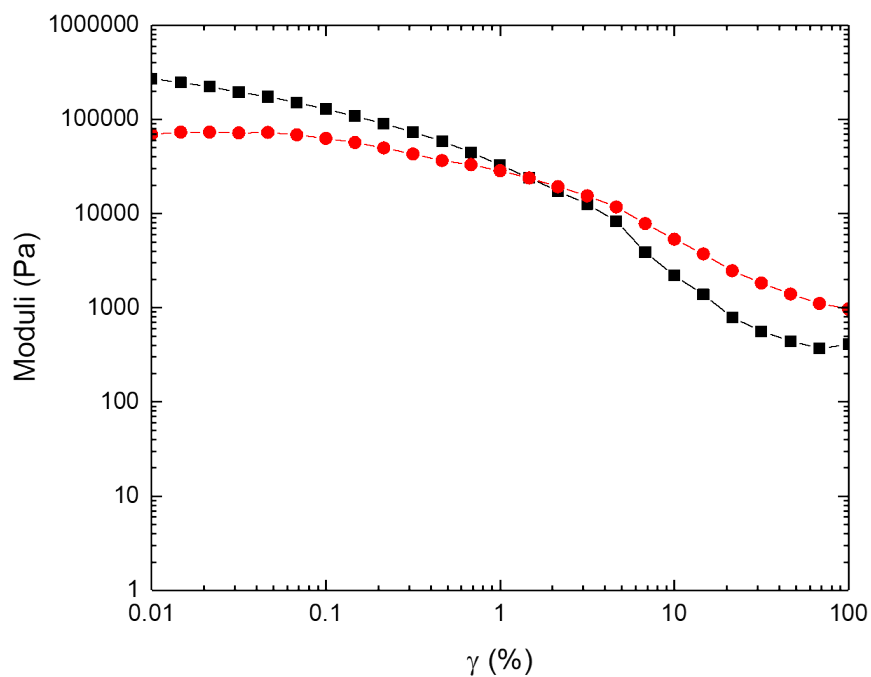

**Figure S70.** Amplitude sweep measurement of gel system I (0.05 M, 1.0 equivalent of  $\text{H}_2\text{SO}_4$ ). Storage modulus  $G'$  (black curve, square points) and loss modulus  $G''$  (red curve, circle points).

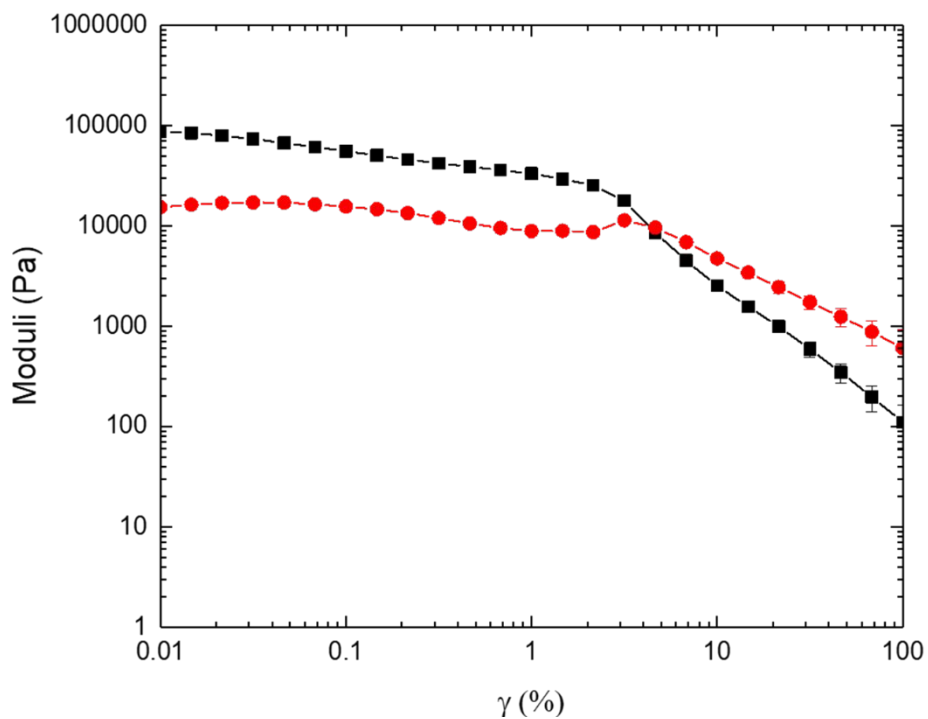

**Figure S71.** Amplitude sweep measurement of gel system I (0.05 M, 0.5 equivalent of  $\text{H}_2\text{SO}_4$ ). Storage modulus  $G'$  (black curve, square points) and loss modulus  $G''$  (red curve, circle points).

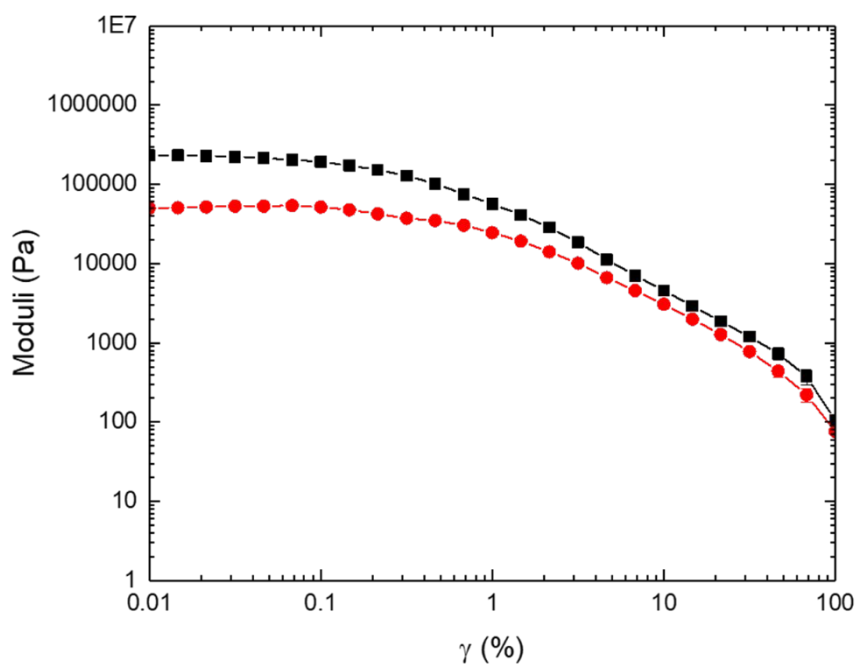

**Figure S72.** Amplitude sweep measurement of gel system II (0.05 M, 1.0 equivalent of  $\text{H}_2\text{SO}_4$ ). Storage modulus  $G'$  (black curve, square points) and loss modulus  $G''$  (red curve, circle points).

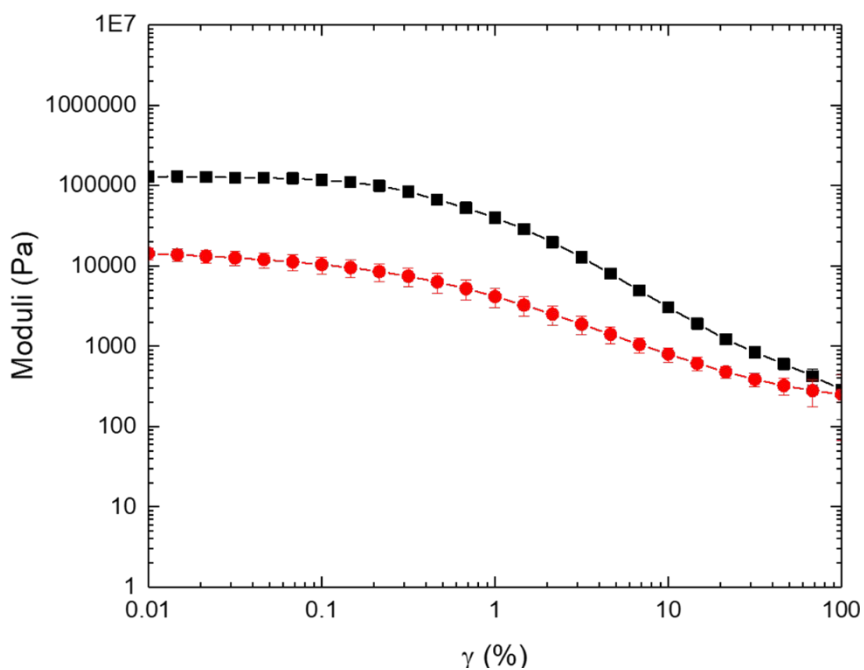

**Figure S73.** Amplitude sweep measurement of gel system **II** (0.05 M, 0.5 equivalent of H<sub>2</sub>SO<sub>4</sub>). Storage modulus  $G'$  (black curve, square points) and loss modulus  $G''$  (red curve, circle points).

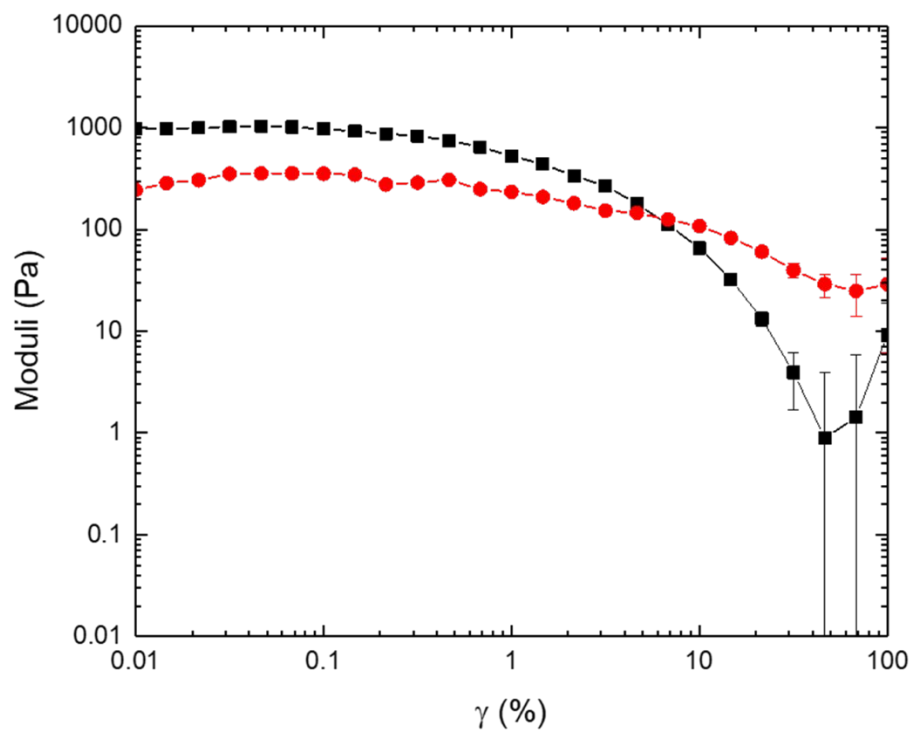

**Figure S74.** Amplitude sweep measurement of gel system **III** (0.025 M, 1.0 equivalent of H<sub>2</sub>SO<sub>4</sub>). Storage modulus  $G'$  (black curve, square points) and loss modulus  $G''$  (red curve, circle points).

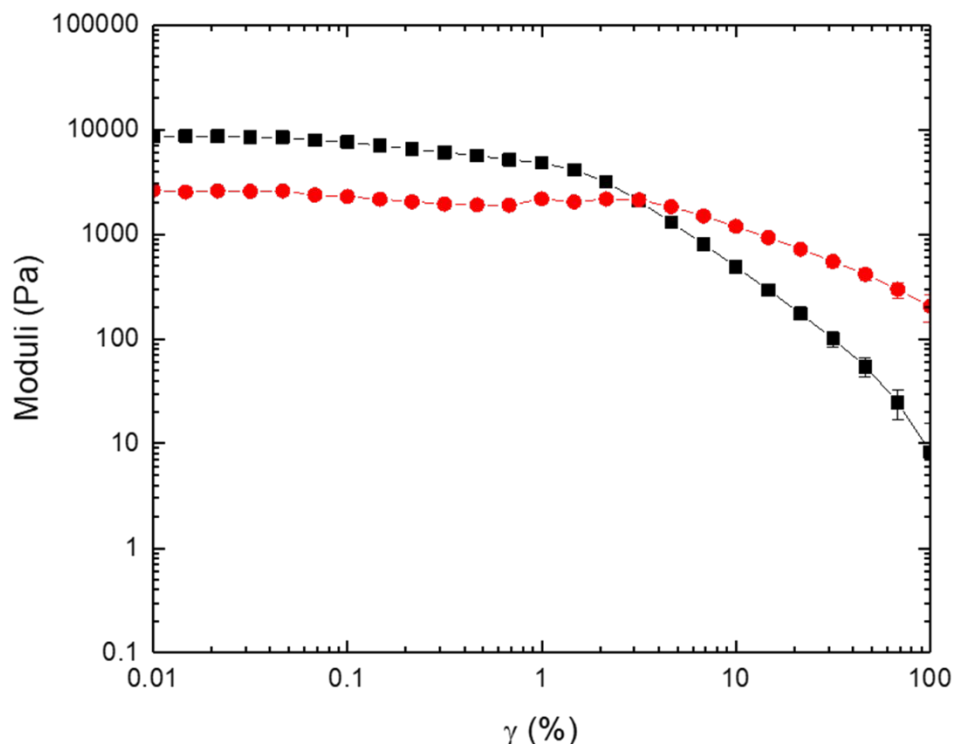

**Figure S75.** Amplitude sweep measurement of gel system **III** (0.05 M, 1.0 equivalent of  $\text{H}_2\text{SO}_4$ ). Storage modulus  $G'$  (black curve, square points) and loss modulus  $G''$  (red curve, circle points).

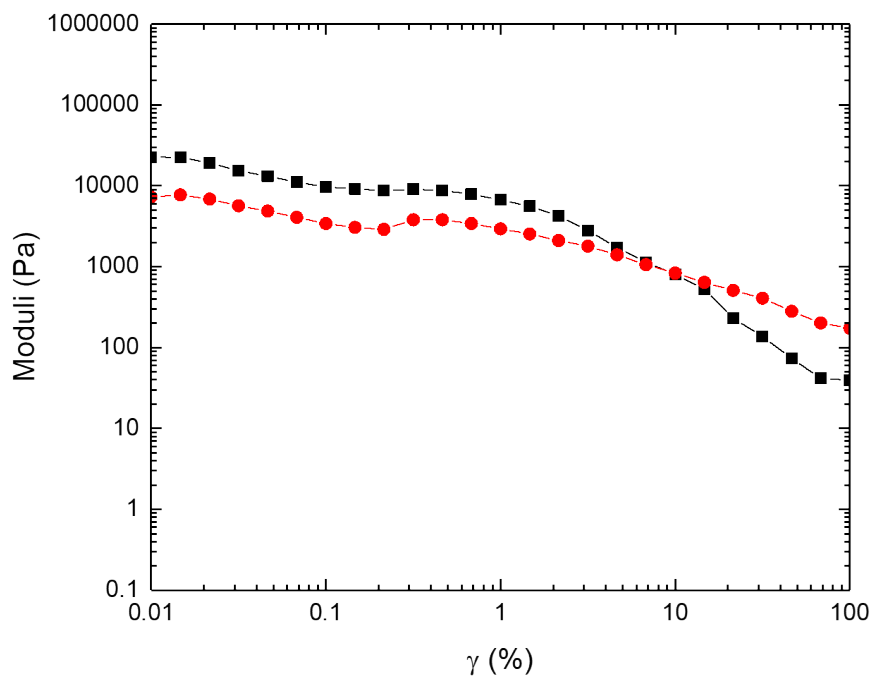

**Figure S76.** Amplitude sweep measurement of gel system **III** (0.05 M, 0.5 equivalent of  $\text{H}_2\text{SO}_4$ ). Storage modulus  $G'$  (black curve, square points) and loss modulus  $G''$  (red curve, circle points).



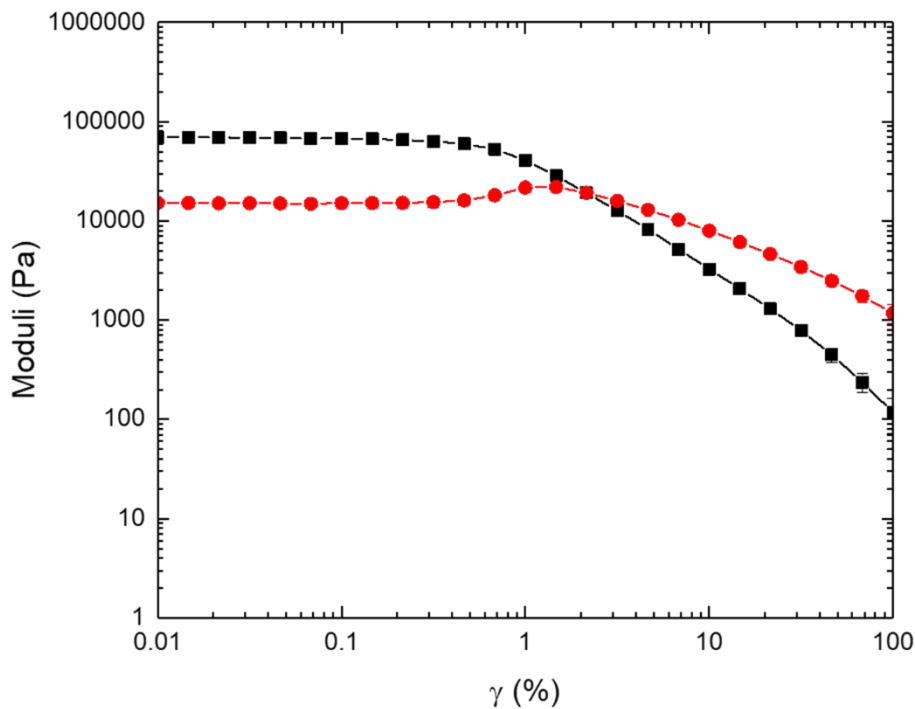

**Figure S77.** Amplitude sweep measurement of gel system **III** (0.1 M, 1.0 equivalent of  $\text{H}_2\text{SO}_4$ ). Storage modulus  $G'$  (black curve, square points) and loss modulus  $G''$  (red curve, circle points).

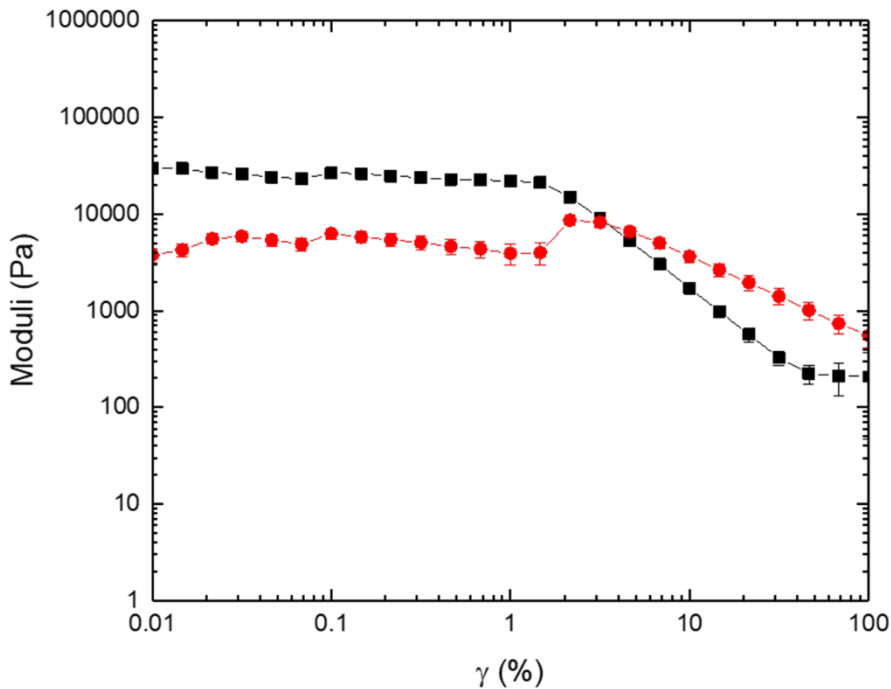

**Figure S78.** Amplitude sweep measurement of gel system **IV** (0.05 M, 1.0 equivalent of  $\text{H}_2\text{SO}_4$ ). Storage modulus  $G'$  (black curve, square points) and loss modulus  $G''$  (red curve, circle points).

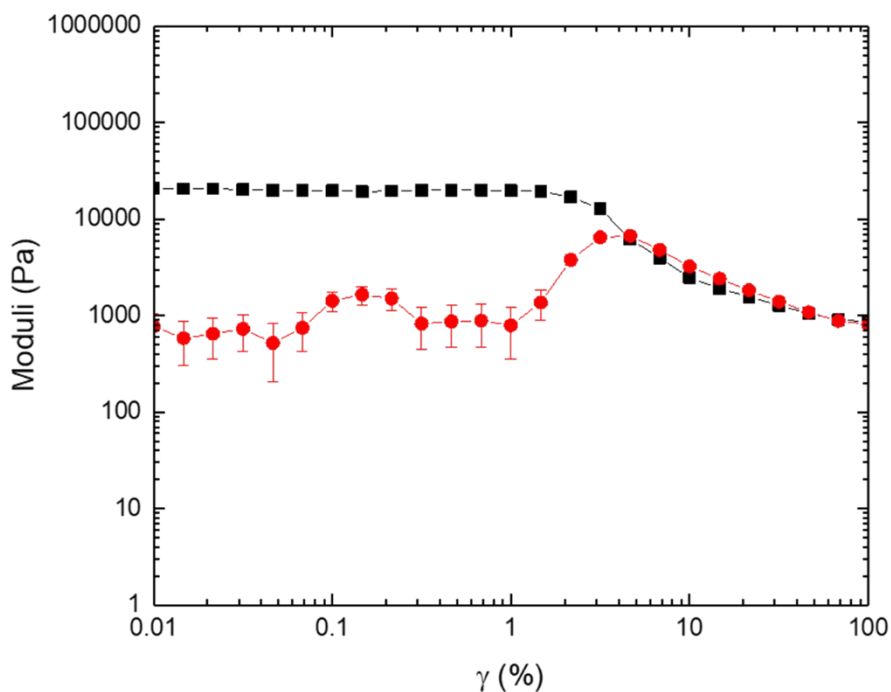

**Figure S79.** Amplitude sweep measurement of gel system IV (0.05 M, 0.5 equivalent of  $\text{H}_2\text{SO}_4$ ). Storage modulus  $G'$  (black curve, square points) and loss modulus  $G''$  (red curve, circle points).

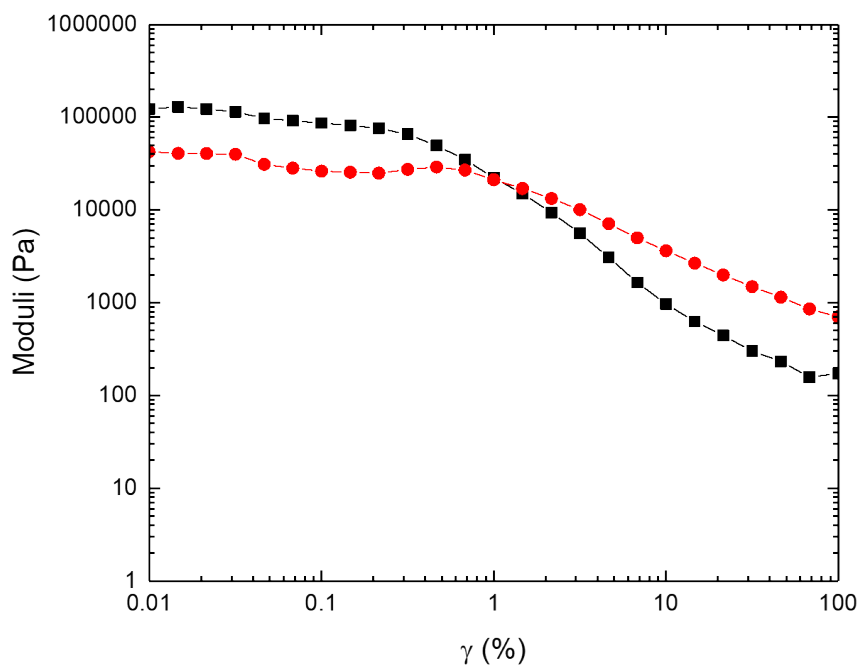

**Figure S80.** Amplitude sweep measurement of gel system IV (0.1 M, 1.0 equivalent of  $\text{H}_2\text{SO}_4$ ). Storage modulus  $G'$  (black curve, square points) and loss modulus  $G''$  (red curve, circle points).
